1 **A bifluorescent-based assay for the identification of neutralizing antibodies**  
2 **against SARS-CoV-2 variants of concern *in vitro* and *in vivo***

3 Kevin Chiem<sup>1</sup>, Desarey Morales Vasquez<sup>1</sup>, Jesus A. Silvas<sup>1</sup>, Jun-Gyu Park<sup>1</sup>, Michael S.  
4 Piepenbrink<sup>2</sup>, Julien Sourimant<sup>3</sup>, Michelle J. Lin<sup>4</sup>, Alexander L. Greninger<sup>4</sup>, Richard K.  
5 Plemper<sup>3</sup>, Jordi B. Torrelles<sup>1</sup>, Mark R. Walter<sup>5</sup>, Juan C. de la Torre<sup>6</sup>, James K. Kobie<sup>2</sup>,  
6 Chengjin Ye<sup>1\*</sup>, Luis Martinez-Sobrido<sup>1\*</sup>

7  
8 <sup>1</sup> Disease Intervention and Prevention and Population Health Programs, Texas  
9 Biomedical Research Institute, San Antonio, Texas 78227, USA

10 <sup>2</sup> Department of Medicine, Division of Infectious Diseases, University of Alabama at  
11 Birmingham, Birmingham, Alabama 35294, USA

12 <sup>3</sup> Center for Translational Antiviral Research, Institute for Biomedical Sciences, Georgia  
13 State University, Atlanta, GA, USA

14 <sup>4</sup> Virology Division, Department of Laboratory Medicine and Pathology, University of  
15 Washington, Seattle, WA, USA

16 <sup>5</sup> Department of Microbiology, University of Alabama at Birmingham, Birmingham,  
17 Alabama 35294, USA

18 <sup>6</sup> Department of Immunology and Microbiology, The Scripps Research Institute, La Jolla,  
19 California 92037, USA

20

21 \*Lead contact email and correspondence:

22 [cye@txbiomed.org](mailto:cye@txbiomed.org)

23 [lmartinez@txbiomed.org](mailto:lmartinez@txbiomed.org)

24        **ABSTRACT**

25        Severe acute respiratory syndrome coronavirus 2 (SARS-CoV-2) emerged at the  
26 end of 2019 and has been responsible for the still ongoing coronavirus disease 2019  
27 (COVID-19) pandemic. Prophylactic vaccines have been authorized by the United  
28 States (US) Food and Drug Administration (FDA) for the prevention of COVID-19.  
29 Identification of SARS-CoV-2 neutralizing antibodies (NAbs) is important to assess  
30 vaccine protection efficacy, including their ability to protect against emerging SARS-  
31 CoV-2 variants of concern (VoC). Here we report the generation and use of a  
32 recombinant (r)SARS-CoV-2 USA/WA1/2020 (WA-1) strain expressing Venus and a  
33 rSARS-CoV-2 expressing mCherry and containing mutations K417N, E484K, and  
34 N501Y found in the receptor binding domain (RBD) of the spike (S) glycoprotein of the  
35 South African (SA) B.1.351 (beta,  $\beta$ ) VoC, in bifluorescent-based assays to rapidly and  
36 accurately identify human monoclonal antibodies (hMAbs) able to neutralize both viral  
37 infections *in vitro* and *in vivo*. Importantly, our bifluorescent-based system accurately  
38 recapitulated findings observed using individual viruses. Moreover, fluorescent-  
39 expressing rSARS-CoV-2 and the parental wild-type (WT) rSARS-CoV-2 WA-1 had  
40 similar viral fitness *in vitro*, as well as similar virulence and pathogenicity *in vivo* in the  
41 K18 human angiotensin converting enzyme 2 (hACE2) transgenic mouse model of  
42 SARS-CoV-2 infection. We demonstrate that these new fluorescent-expressing rSARS-  
43 CoV-2 can be used *in vitro* and *in vivo* to easily identify hMAbs that simultaneously  
44 neutralize different SARS-CoV-2 strains, including VoC, for the rapid assessment of  
45 vaccine efficacy or the identification of prophylactic and/or therapeutic broadly NAbs for  
46 the treatment of SARS-CoV-2 infection.

47        **KEYWORDS**

48        SARS-CoV-2, coronavirus, COVID-19, fluorescence, reporter genes, reporter virus,  
49        bifluorescent-based assay, microneutralization assay, co-infection, animal model, K18  
50        hACE2 transgenic mice, neutralizing antibodies.

51

52

53

54

55

56

57

58

59

60

61

62

63

64

65

66

67

68

69

70        **INTRODUCTION**

71        The emergence of SARS-CoV-2 at the end of 2019 has been responsible for the  
72        COVID-19 pandemic <sup>1</sup>. Despite numerous efforts to contain viral spread, SARS-CoV-2  
73        disseminated worldwide and as of today it has been linked to over 175 million infections  
74        and more than 3.8 million deaths around the world <sup>2</sup>. To date, one antiviral drug  
75        (remdesivir) and three human monoclonal antibodies (hMAbs) (Casirivimab/imdevimab,  
76        Bamlanivimab/etesevimab, and Sotrovimab) have been approved by the United States  
77        (US) Food and Drug Administration (FDA) for the treatment of COVID-19 <sup>3-5</sup>. As of June  
78        2021, six prophylactic vaccines against SARS-CoV-2 have been authorized by the US  
79        FDA to prevent SARS-CoV-2 infection <sup>6-8</sup>. However, recent evidence suggest that newly  
80        identified SARS-CoV-2 VoC are not efficiently neutralized by sera from naturally  
81        infected or vaccinated individuals <sup>9</sup>, raising concerns about the protective efficacy of  
82        current vaccines against emerging SARS-CoV-2 VoC <sup>10-12</sup>.

83        To investigate SARS-CoV-2 infection *in vitro* and *in vivo*, including tissue and cell  
84        tropism and pathogenesis, recombinant viruses expressing a variety of reporter genes  
85        have been generated. We and others have documented the generation of recombinant  
86        (r)SARS-CoV-2 expressing fluorescent (Venus, mCherry, mNeonGreen, and GFP) or  
87        luciferase (Nluc) reporter genes <sup>13-16</sup> and their use for the identification of neutralizing  
88        antibodies (NAbs) or antivirals <sup>14-19</sup>. Importantly, these reporter-expressing rSARS-CoV-  
89        2 have been shown to have growth kinetics and plaque phenotype in cultured cells  
90        similar to those of their parental rSARS-CoV-2 wild-type (WT). Current rSARS-CoV-2  
91        have been genetically engineered to express the reporter gene replacing the open

92 reading frame (ORF) encoding for the 7a viral protein, an approach similar to that used  
93 with SARS-CoV<sup>16,20</sup>.

94 Recently, we described the generation of rSARS-CoV-2 expressing reporter genes  
95 where the porcine teschovirus 1 (PTV-1) 2A autoproteolytic cleavage site was placed  
96 between the reporter gene of choice and the viral nucleocapsid (N) protein<sup>20</sup>. Three  
97 major advantages of this new approach are: 1) all viral proteins are expressed (e.g. the  
98 insertion of the reporter does not replace or remove a viral protein)<sup>20</sup>; 2) high levels of  
99 reporter gene expression from the N locus in the viral genome<sup>20</sup>; and, 3) high genetic  
100 stability of the viral genome *in vitro* and *in vivo* because of the need of the viral N protein  
101 for genome replication and gene transcription<sup>20</sup>. Importantly, this new approach allowed  
102 the visualization of infected cells *in vitro* and supported tracking SARS-CoV-2 infection  
103 *in vivo*<sup>20</sup>. Notably, these new reporter-expressing rSARS-CoV-2 exhibited WT-like  
104 plaque size phenotype and viral growth kinetics *in vitro*, as well as pathogenicity in K18  
105 human angiotensin converting enzyme 2 (hACE2) transgenic mice.

106 Using this strategy, we have successfully rescued Venus- and mCherry-expressing  
107 rSARS-CoV-2 USA/WA1/2020 (WA-1) and a new rSARS-CoV-2 expressing mCherry  
108 and containing mutations K417N, E484K, and N501Y present in the receptor binding  
109 domain (RBD) of the viral spike (S) glycoprotein of the South Africa (SA) B.1.351 (beta,  
110  $\beta$ ) VoC<sup>12</sup>. Using rSARS-CoV-2 WA-1 expressing Venus and rSARS-CoV-2 SA  
111 expressing mCherry, we developed a novel bifluorescent-based assay to readily and  
112 accurately evaluate hMAbs able to specifically neutralize one or both viral variants.  
113 Importantly, the 50% neutralizing titers (NT<sub>50</sub>) obtained with this new bifluorescent-  
114 based assay correlated well with those obtained using individual viruses in separated

115 wells. Moreover, we also demonstrated the feasibility of using rSARS-CoV-2 expressing  
116 different S and fluorescent proteins (FP) to rapidly identify hMAbs able to neutralize *in*  
117 *vivo* both SARS-CoV-2 strains using an *in vivo* imaging system (IVIS). These new tools  
118 will help advance our understanding of efficacy of current and future SARS-CoV-2  
119 vaccines, as well as contribute to the identification of hMAbs with broadly neutralizing  
120 activity against SARS-CoV-2 strains, including VoC, for the therapeutic or prophylactic  
121 treatment of SARS-CoV-2 infection.

122

123

124

125

126

127

128

129

130

131

132

133

134

135

136

137

138       **RESULTS**

139       **Generation and characterization of rSARS-CoV-2 expressing FPs**

140       The pBeloBAC11 plasmid encoding the full-length viral genome of SARS-CoV-2  
141       WA-1 was used as backbone to generate the different rSARS-CoV-2<sup>16,20,21</sup>. We  
142       constructed new rSARS-CoV-2 reporter viruses that retained all viral genes by cloning  
143       the Venus or mCherry FP upstream of the viral N gene using the PTV-1 2A  
144       autocleavage sequence (**Figure 1A**)<sup>20</sup>. Recombinant viruses expressing FPs using this  
145       experimental approach based on the use of the 2A cleavage site from the N locus do  
146       not require removing any viral genes<sup>20</sup>, express higher levels of reporter gene  
147       expression compared to those previously described from the locus of the ORF7a<sup>20</sup>, and  
148       are genetically more stable<sup>20</sup>.

149       To characterize the newly generated FP-expressing rSARS-CoV-2 we first assessed  
150       Venus and mCherry expression levels. Confluent monolayers of Vero E6 cells were  
151       infected (MOI 0.01 plaque forming units (PFU)/cell) with either rSARS-CoV-2 WT,  
152       rSARS-CoV-2 Venus, rSARS-CoV-2 mCherry, or mock-infected, and then examined by  
153       fluorescence microscopy (**Figure 1B**). As expected, only cells infected with rSARS-  
154       CoV-2 Venus or rSARS-CoV-2 mCherry were detected under a fluorescent microscope  
155       (**Figure 1B**). Cells infected with rSARS-CoV-2 WT, rSARS-CoV-2 Venus, and rSARS-  
156       CoV-2 mCherry showed comparable levels of N protein expression (**Figure 1C**).

157       We next determined the multi-step growth kinetics of the newly generated rSARS-  
158       CoV-2. Vero E6 cells were infected (MOI 0.01 PFU/cell) with rSARS-CoV-2 Venus or  
159       rSARS-CoV-2 mCherry, individually or together, and tissue culture supernatants  
160       collected over a course of 96 h to determine viral titers (**Figure 1D**). Kinetics of

161 production and peak titers of infectious progeny were similar for rSARS-CoV-2  
162 expressing Venus or mCherry. Results from co-infection experiments using Venus- and  
163 mCherry-expressing rSARS-CoV-2 indicated that both viruses had similar fitness under  
164 the experimental conditions used (**Figure 1E**). This conclusion was further validated by  
165 assessing FP expression in cells infected with rSARS-CoV-2 Venus and rSARS-CoV-2  
166 mCherry, alone or in combination (**Figure 1F**). Moreover, both rSARS-CoV-2 Venus  
167 and rSARS-CoV-2 mCherry exhibited similar plaque formation efficiency and plaque  
168 size phenotype as the parental rSARS-CoV-2 WT (**Figure 1G**).

### 169 **A bifluorescent-based assay for the identification of SARS-CoV-2 NAbS**

170 We next assessed the feasibility of using these two FP-expressing rSARS-CoV-2,  
171 alone and in combination, to identify NAbS against SARS-CoV-2. For proof of concept,  
172 we used hMAbs 1212C2 and 1213H7, both previously shown to potently neutralize  
173 rSARS-CoV-2<sup>22,23</sup>. The NT<sub>50</sub> values of 1212C2 against rSARS-CoV-2 Venus (0.97 ng)  
174 (**Figure 2A**), rSARS-CoV-2 mCherry (1.20 ng) (**Figure 2B**), as well as rSARS-CoV-2  
175 Venus and rSARS-CoV-2 mCherry together (0.86 ng and 0.88 ng, respectively) (**Figure**  
176 **2C**) were similar to those reported using a natural SARS-CoV-2 WA-1 isolate<sup>16,22</sup>. The  
177 NT<sub>50</sub> of 1213H7 against rSARS-CoV-2 Venus (2.19 ng) (**Figure 2D**), rSARS-CoV-2  
178 mCherry (3.17 ng) (**Figure 2E**), and both, rSARS-CoV-2 Venus and rSARS-CoV-2  
179 mCherry together (2.32 ng and 1.96 ng, respectively) (**Figure 2F**) were similar to those  
180 obtained with the natural SARS-CoV-2 WA-1 isolate<sup>16</sup>. These results demonstrated the  
181 feasibility of using rSARS-CoV-2 expressing Venus and mCherry reporter genes in a  
182 new bifluorescent-based assay to identify SARS-CoV-2 NAbS.

### 183 **Generation and characterization of rSARS-CoV-2 mCherry SA**



184 The emergence of new SARS-CoV-2 VoC, including the SA B.1.351 (beta,  $\beta$ )<sup>12</sup>, is a  
185 major health threat since the efficacy of current vaccines against recently identified VoC  
186 may be diminished. We sought to develop an assay that would allow us to evaluate the  
187 protective efficacy of hMAbs against WA-1 and SA VoC within the same well. Towards  
188 this objective, we generated a rSARS-CoV-2 containing the K417N, E484K, and N501Y  
189 mutations found in the S RBD of the SA strain of SARS-CoV-2 and expressing also  
190 mCherry, referred to as rSARS-CoV-2 mCherry SA (**Figure 3A**). The genetic identity of  
191 the rescued rSARS-CoV-2 mCherry SA was confirmed by Sanger sequencing (**Figure**  
192 **3B**).

193 Next, we aimed to characterize the rSARS-CoV-2 mCherry SA by assessing reporter  
194 expression levels using rSARS-CoV-2 and rSARS-CoV-2 Venus as controls. Vero E6  
195 cells were infected (MOI 0.01 PFU/cell) with rSARS-CoV-2 WT, rSARS-CoV-2 Venus,  
196 or rSARS-CoV-2 mCherry SA, and expression of Venus and mCherry assessed by  
197 epifluorescence microscopy (**Figure 3C**). Only cells infected with rSARS-CoV-2 Venus  
198 or rSARS-CoV-2 mCherry SA were fluorescent. However, immunostaining with the  
199 SARS-CoV cross-reactive N protein mMAb (1C7C7) detected cells infected with rSARS-  
200 CoV-2 WT, rSARS-CoV-2 Venus and rSARS-CoV-2 mCherry SA (**Figure 3C**). Next, we  
201 compared the growth kinetics of rSARS-CoV-2 mCherry SA and rSARS-CoV-2 Venus in  
202 Vero E6 cells (**Figures 3D-3F**). Interestingly, at all hpi tested, tissue culture  
203 supernatants from rSARS-CoV-2 mCherry SA infected cells had higher viral titers than  
204 those from rSARS-CoV-2 Venus infected cells (**Figure 3D**), which correlated with a  
205 higher number of mCherry than Venus positive cells in cells co-infected with rSARS-  
206 CoV-2 Venus and rSARS-CoV-2 mCherry SA (**Figures 3E and 3F**). These results were

207 further confirmed when we assessed multiplication of rSARS-CoV-2 Venus and rSARS-  
208 CoV-2 mCherry SA by plaque assay (**Figure 3G**). Larger plaque foci were observed in  
209 cells infected with rSARS-CoV-2 mCherry SA compared to those infected with rSARS-  
210 CoV-2 Venus (**Figure 3G**). We have also observed a similar fitness advantage of a  
211 natural SARS-CoV-2 SA natural isolate over SARS-CoV-2 WA-1 <sup>24</sup>.

### 212 **A bifluorescent-based assay to identify SARS-CoV-2 broadly NABs**

213 We next evaluated whether the rSARS-CoV-2 Venus and rSARS-CoV-2 mCherry  
214 SA could be used in a bifluorescent-based assay to identify broadly NABs, using the  
215 1212C2 and 1213H7 hMAbs (**Figure 2**). Preliminary data using natural SARS-CoV-2  
216 WA-1 and SA isolates showed that 1212C2 neutralized SARS-CoV-2 WA-1 but not  
217 SARS-CoV-2 SA VoC, while 1213H7 neutralized both viral isolates <sup>22,23</sup>. As expected,  
218 1212C2 was able to efficiently neutralize rSARS-CoV-2 Venus (NT<sub>50</sub> 0.53 ng) (**Figure**  
219 **4A**) but not rSARS-CoV-2 mCherry SA (NT<sub>50</sub> > 500 ng) (**Figure 4B**), alone or in  
220 combination (NT<sub>50</sub> 1.96 ng and > 500 ng, respectively) (**Figure 4C**). In contrast, 1213H7  
221 was able to efficiently neutralize both rSARS-CoV-2 Venus (NT<sub>50</sub> 11.89 ng) (**Figure 4D**)  
222 and rSARS-CoV-2 mCherry SA (NT<sub>50</sub> 6.54 ng) (**Figure 4E**), alone or in combination  
223 (NT<sub>50</sub> 12.08 and 7.97 ng, respectively) (**Figure 4F**). These results demonstrated the  
224 feasibility of using this novel bifluorescent-based assay to readily and reliably identify  
225 hMAbs with neutralizing activity against both SARS-CoV-2 strains within the same  
226 assay and that these results recapitulated those of experiments following individual viral  
227 infections and classical neutralization assays using natural viral isolates.

228 To further demonstrate the feasibility of this new bifluorescence-based assay to  
229 identify hMAbs able to neutralize different SARS-CoV-2 strains present in the same

230 sample, we assessed the neutralizing activity of a selected set of previously described  
231 hMAbs<sup>22</sup>. CB6, REGN10933, and REGN10987 hMAbs were used as internal controls  
232 in the assay<sup>25,26</sup>. CB6 (**Figure 5A**) and REGN10933 (**Figure 5B**) neutralized rSARS-  
233 CoV-2 Venus (NT<sub>50</sub> of 1.02 and 1.53 ng, respectively) but exhibited limited  
234 (REGN10933, NT<sub>50</sub> > 240.9 ng) or no (CB6, NT<sub>50</sub> > 500 ng) neutralization activity  
235 against rSARS-CoV-2 mCherry SA. On the other hand, REGN10987 (**Figure 5C**)  
236 efficiently neutralized both rSARS-CoV-2 Venus and rSARS-CoV-2 mCherry SA (NT<sub>50</sub>  
237 of 0.63 and 0.18 ng, respectively) (**Figure 5C**). Some of the tested hMAbs were also  
238 able to specifically neutralize rSARS-CoV-2 Venus but not rSARS-CoV-2 mCherry SA,  
239 including 1206D12 (NT<sub>50</sub> 0.58 and > 500 ng, respectively) (**Figure 5D**), 1212D5 (NT<sub>50</sub>  
240 0.54 and > 500 ng, respectively) (**Figure 5E**), and 1215D1 (NT<sub>50</sub> 20.31 and > 500 ng,  
241 respectively) (**Figure 5F**). We identified hMAbs with broadly neutralizing activity against  
242 both rSARS-CoV-2 Venus and rSARS-CoV-2 mCherry SA, including 1206G12 (NT<sub>50</sub> of  
243 2.23 and 1.18 ng, respectively) (**Figure 5G**), 1212F2 (NT<sub>50</sub> of 31.14 and 10.64 ng,  
244 respectively) (**Figure 5H**), and 1207B4 (6.45 and 1.05 ng, respectively) (**Figure 5I**).  
245 These results support the feasibility of this novel bifluorescent-based assay to identify  
246 broad neutralizing hMAbs against different SARS-CoV-2 strains within the same assay.

#### 247 **An *in vivo* bifluorescent-based assay to identify SARS-CoV-2 broadly NABs**

248 Based on our *in vitro* results, we hypothesized that our novel bifluorescent-based  
249 assay to identify NABs against different SARS-CoV-2 strains could be adapted to  
250 assess the neutralizing activity of hMAbs *in vivo*. To test this hypothesis, we assessed  
251 the ability of 1212C2 and 1213H7 hMAbs to neutralize rSARS-CoV-2 Venus and  
252 rSARS-CoV-2 mCherry SA, alone or in combination, in the K18 hACE2 transgenic

253 mouse model of SARS-CoV-2 infection (**Figure 6**)<sup>27</sup>. Mice were treated intraperitoneally  
254 (i.p.) with 25 mg/kg of 1212C2, 1213H7, or an IgG isotype control 24 h prior to  
255 challenge with 10<sup>4</sup> PFU of rSARS-CoV-2 Venus, rSARS-CoV-2 mCherry SA, or both  
256 rSARS-CoV-2 Venus and rSARS-CoV-2 mCherry SA together. Body weight (**Figure**  
257 **6A**) and survival (**Figure 6B**) were evaluated for 12 days post-infection (pi). IgG isotype  
258 control-treated mice infected with rSARS-CoV-2 Venus, rSARS-CoV-2 mCherry SA, or  
259 both rSARS-CoV-2 Venus and rSARS-CoV-2 mCherry SA together, exhibited weight  
260 loss starting on day 4 pi (**Figure 6A**) and succumbed to viral infection between days 6  
261 to 8 pi (**Figure 6B**). However, all mice treated with 1212C2 or 1213H7 survived  
262 challenge with rSARS-CoV-2 Venus, consistent with efficient neutralization of SARS-  
263 CoV-2 WA-1 *in vitro* by these two hMAbs (**Figures 2 and 4**). In contrast, only 1213H7,  
264 but not 1212C2, was able to protect mice infected with rSARS-CoV-2 mCherry SA  
265 (**Figures 6A and 6B**), consistent with the inability of 1212C2 to neutralize rSARS-CoV-2  
266 mCherry SA *in vitro* (**Figure 4**). When mice were co-infected with both rSARS-CoV-2  
267 Venus and rSARS-CoV-2 mCherry SA, only mice treated with 1213H7 retained their  
268 initial body weight and survived infection (**Figures 6A and 6B**, right panels), similar to  
269 results obtained using individual infections.

#### 270 **Use of FP expression to assess kinetics of SARS-CoV-2 multiplication in the** 271 **lungs of infected K18 hACE2 transgenic mice**

272 We next examined whether FP expression could be used as a surrogate of SARS-  
273 CoV-2 multiplication in the lungs of infected mice, providing a readout to assess the *in*  
274 *vivo* protective activity of 1212C2 and 1213H7 hMAbs through IVIS (**Figure 7**). K18  
275 hACE2 transgenic mice were treated (i.p., 25 mg/kg) with IgG isotype control, 1212C2,

276 or 1213H7 hMAbs, 24 h before infection ( $10^4$  PFU/mouse) with rSARS-CoV-2 Venus  
277 and/or rSARS-CoV-2 mCherry SA, singly or in combination. Mock-infected mice were  
278 included as control. At days 2 and 4 pi, Venus and mCherry expression in the lungs was  
279 evaluated using IVIS (**Figure 7A**) and quantified using Aura imaging software (**Figure**  
280 **7B**). Excised lungs were also evaluated in a blinded manner by a certified pathologist to  
281 provide gross pathological scoring (**Figure 7A**). Both Venus and mCherry expression  
282 were detected in the lungs of mice treated with the IgG isotype control and infected with  
283 rSARS-CoV-2 Venus and/or rSARS-CoV-2 mCherry SA, respectively (**Figure 7A**),  
284 alone or in combination. Fluorescent signal increased from day 2 to day 4 pi in the lungs  
285 of all IgG isotype control-treated infected mice (**Figure 7B**). Mice treated with 1212C2  
286 and infected with rSARS-CoV-2 Venus showed no detectable Venus signal, indicating  
287 that 1212C2 protects against rSARS-CoV-2 Venus infection (**Figure 7A**, top panel). In  
288 contrast, 1212C2-treated mice infected with rSARS-CoV-2 mCherry SA expressed  
289 mCherry in the lungs (**Figure 7A**, middle panel). In mice treated with 1212C2 and co-  
290 infected with both rSARS-CoV-2 Venus and rSARS-CoV-2 mCherry SA, we observed  
291 only mCherry expression, consistent with the ability of 1212C2 to neutralize rSARS-  
292 CoV-2 Venus but not rSARS-CoV-2 mCherry SA (**Figure 7A**, bottom panel).

293 Corroborating our previous *in vitro* and *in vivo* results (**Figures 4 and 6**, respectively),  
294 mice treated with 1213H7 were protected against infection with both rSARS-CoV-2  
295 Venus and rSARS-CoV-2 mCherry SA, when administered alone or in combination, and  
296 presented no detectable fluorescence in the lungs (**Figure 7A**). These data were further  
297 supported by quantification of the average radiant efficiency of fluorescence signals,  
298 which were high in the lungs of IgG isotype control-treated mice infected with rSARS-

299 CoV-2 Venus or rSARS-CoV-2 mCherry SA, and in the lungs of 1212C2-treated mice  
300 infected with rSARS-CoV-2 mCherry SA (**Figure 7B**). Importantly, gross pathological  
301 scoring correlated with levels of FP expression in the lungs of infected mice.

302 As predicted, IgG isotype control-treated K18 hACE2 transgenic mice infected with  
303 rSARS-CoV-2 Venus (**Figure 8A**), rSARS-CoV-2 mCherry SA (**Figure 8B**), or both  
304 rSARS-CoV-2 Venus and rSARS-CoV-2 mCherry SA (**Figure 8C**) presented high viral  
305 titers. In contrast, lungs of 1212C2-treated and infected mice had undetectable levels of  
306 rSARS-CoV-2 Venus (**Figure 8A**), but high titers of rSARS-CoV-2 mCherry SA when  
307 mice were individually infected (**Figure 8B**) or co-infected with both viruses (**Figure 8C**).  
308 In 1213H7-treated and infected mice, we did not detect rSARS-CoV-2 Venus (**Figure**  
309 **8A**) or rSARS-CoV-2 mCherry SA (**Figure 8B**), including double infected mice (**Figure**  
310 **8C**), consistent with the ability of 1213H7 to potently neutralize both viruses *in vitro* and  
311 *in vivo* (**Figures 4 and 6**, respectively),

312 Lung homogenates from IgG isotype control-treated mice infected with both reporter  
313 viruses contained ~25% and ~75% of Venus and mCherry, respectively, positive  
314 plaques by day 2 pi. This finding suggested that rSARS-CoV-2 mCherry SA had a  
315 higher fitness than rSARS-CoV-2 Venus *in vivo* (**Figure 8D**), which was similar to our *in*  
316 *vitro* studies (**Figure 3**). Notably, by day 4 pi all viral plaques were mCherry-positive,  
317 further supporting a higher fitness of rSARS-CoV-2 mCherry SA compared to rSARS-  
318 CoV-2 Venus *in vivo* (**Figure 8D**). Lung homogenates from 1212C2-treated mice  
319 contained rSARS-CoV-2 mCherry SA, reflecting the ability of 1212C2 to efficiently  
320 neutralize rSARS-CoV-2 Venus but not rSARS-CoV-2 mCherry SA. In contrast, no viral  
321 plaques were detected in lung homogenates from mice treated with 1213H7, as this

322 hMAb efficiently neutralizes both viruses. We obtained similar results in the nasal  
323 turbinate (**Figure 8**, middle) and brain (**Figure 8**, bottom) of hMAb-treated and infected  
324 K18 hACE2 transgenic mice.

325

326

327

328

329

330

331

332

333

334

335

336

337

338

339

340

341

342

343

344

345        **DISCUSSION**

346        The COVID-19 pandemic caused by SARS-CoV-2 started at the end of 2019 <sup>1</sup>.  
347        Despite US FDA-authorized prophylactic vaccines <sup>6-8</sup> and some, although still limited,  
348        available therapeutic antiviral drugs (remdesivir) and neutralizing hMAbs  
349        (Casirivimab/imdevimab, Bamlanivimab/etesevimab, and Sotrovimab) interventions <sup>3-5</sup>,  
350        over 175 million infections and more than 3.8 million deaths have been attributed to the  
351        COVID-19 pandemic globally <sup>2</sup>. As with other viruses, SARS-CoV-2 is continuously  
352        evolving, resulting in viral variants (e.g. VoC) that are becoming dominant within the  
353        human population due to increased fitness, transmission and/or resilience against  
354        naturally or vaccine induced immune responses. To date, several VoC have been  
355        identified, including the United Kingdom B.1.1.7 (alpha,  $\alpha$ ) <sup>28</sup>, SA B.1.351 ( $\beta$ ) <sup>12</sup>, Brazil  
356        P.1 (gamma,  $\gamma$ ) <sup>29,30</sup>, India B.1.617.2 (delta,  $\delta$ ) <sup>31</sup>, and California B.1.427 (epsilon,  $\epsilon$ ) <sup>32</sup>.  
357        There is limited information on the ability of current vaccines to protect against these  
358        newly identified SARS-CoV-2 VoC <sup>9,10,33</sup>. Moreover, it is likely that additional VoC will  
359        emerge in the future.

360        Reporter-expressing recombinant viruses can circumvent limitations imposed by the  
361        need for secondary methods to detect the presence of viruses in infected cells. These  
362        reporter viruses have been used to evaluate viral infections, identify therapeutics, and to  
363        study viral virulence *in vivo*. Here, we have documented the generation of novel rSARS-  
364        CoV-2 to facilitate tracking infection of two different SARS-CoV-2 strains (WA-1 and SA)  
365        *in vitro* and *in vivo* based on the use of two different FPs (Venus and mCherry,  
366        respectively). The FP-expressing rSARS-CoV-2 encode the fluorescent Venus or  
367        mCherry proteins from the locus of the N protein, without the need for deletion of any



368 viral protein<sup>20</sup>. Notably, the use of this approach to generate FP-expressing rSARS-  
369 CoV-2 resulted in higher FP expression levels than those afforded by rSARS-CoV-2  
370 expressing FPs from the locus of the viral ORF7a protein<sup>20</sup>. Moreover, rSARS-CoV-2  
371 expressing reporter genes from the N locus are more genetically stable than those  
372 expressing reporter genes from the ORF7a locus of the SARS-CoV-2 genome<sup>20</sup>.

373 We showed that rSARS-CoV-2 expressing Venus or mCherry from the N locus  
374 exhibited similar growth kinetics, peak titers, and plaque phenotype as the parental WT  
375 rSARS-CoV-2 WA-1 strain. Importantly, we were able to use these novel reporter  
376 rSARS-CoV-2 in bifluorescent-based assays to determine the neutralization efficacy of  
377 hMAbs based on FP expression levels. We also generated rSARS-CoV-2 mCherry SA,  
378 an mCherry-expressing rSARS-CoV-2 containing the K417N, E484K, and N501Y  
379 mutations in the RBD of the S glycoprotein of the SA VoC. Notably, rSARS-CoV-2  
380 mCherry SA had higher fitness than rSARS-CoV-2 Venus in cultured cells, as  
381 evidenced by higher viral titers reached and a bigger plaque size phenotype.  
382 Interestingly, when used in the bifluorescent-based assay, hMAb 1212C2 was unable to  
383 neutralize rSARS-CoV-2 mCherry SA, but efficiently neutralized rSARS-CoV-2 Venus.  
384 In contrast, hMAb 1213H7 displayed efficient neutralization of both rSARS-CoV-2  
385 Venus and rSARS-CoV-2 mCherry SA. Importantly, these *in vitro* results correlated with  
386 *in vivo* studies in which K18 hACE2 transgenic mice pre-treated with 1212C2 were  
387 protected against challenge with rSARS-CoV-2 Venus but not rSARS-CoV-2 mCherry  
388 SA, alone or in combination. In contrast, mice treated with 1213H7 were protected  
389 against lethal challenge with both reporter-expressing rSARS-CoV-2, alone or in  
390 combination. These protection results were corroborated through IVIS studies, in which

391 fluorescence and viral titers demonstrated the neutralizing protective efficacy of 1212C2  
392 against rSARS-CoV-2 Venus but not rSARS-CoV-2 mCherry SA, while 1213H7  
393 efficiently protected mice against challenge with both viruses, alone or in combination.  
394 These results prove the feasibility of using both rSARS-CoV-2 Venus and rSARS-CoV-2  
395 mCherry SA to accurately assess the ability of hMAbs to efficiently neutralize one or  
396 both SARS-CoV-2 strains, alone or in combination, *in vitro* and/or *in vivo*, and establish  
397 that the readouts of the bifluorescent-based assays correlate well with those of  
398 individual viral infections.

399 rSARS-CoV-2 expressing FP or luciferase reporter genes have been described by  
400 us and others<sup>13-16</sup>, but in this study we have documented, for the first time, the use of  
401 two rSARS-CoV-2 expressing different FP and S glycoproteins in a bifluorescent-based  
402 assay to identify NAbs exhibiting differences in their neutralizing activity against different  
403 SARS-CoV-2 strains present in the same biological sample *in vitro* and *in vivo*. Notably,  
404 this approach can be extended to identify broadly NAbs against different SARS-CoV-2  
405 VoC by generating rSARS-CoV-2 expressing additional FP and containing the S  
406 glycoproteins of different VoC in multiplex-based fluorescent assays *in vitro* and/or *in*  
407 *vivo*. These reporter rSARS-CoV-2 expressing the S glycoprotein of VoC also represent  
408 an excellent option to investigate viral infection, dissemination, pathogenesis and  
409 therapeutic interventions, including protective efficacy of vaccines or antivirals, for the  
410 treatment of SARS-CoV-2 infection in cultured cells and/or in validated animals models  
411 of SARS-CoV-2 infection.

412

413

414        **METHODS**

415        **Biosafety**

416        Experiments involving the use of infectious SARS-CoV-2 were performed at  
417        biosafety level 3 (BSL3) containment laboratories at Texas Biomedical Research  
418        Institute. All experiments using SARS-CoV-2 were approved by the Institutional  
419        Biosafety Committee (IBC) at Texas Biomedical Research Institute.

420        **Cells**

421        African green monkey kidney epithelial cells (Vero E6, CRL-1586) were grown and  
422        maintained in Dulbecco's modified Eagle's medium (DMEM) supplemented with 10%  
423        fetal bovine serum (FBS) and 1X PSG (100 units/ml penicillin, 100 µg/ml streptomycin,  
424        and 2 mM L-glutamine), and incubated at 37°C in an 5% CO<sub>2</sub> atmosphere.

425        **Generation of pBeloBAC11-SARS-CoV-2 encoding fluorescent proteins (FP)**

426        The pBeloBAC11 plasmid (NEB) containing the entire viral genome of SARS-CoV-2  
427        USA/WA1/2020 (WA-1) isolate (accession no. MN985325) has been described <sup>20,21</sup>.  
428        The rSARS-CoV-2 expressing Venus or mCherry from the locus of the viral N protein  
429        using the PTV-1 2A autocleavage sequence were generated as previously described  
430        <sup>20,21</sup>. The rSARS-CoV-2 containing mutations K417N, E484K, and N501Y present in the  
431        receptor binding domain (RBD) within the spike (S) gene of the South African (SA)  
432        B.1.351 (beta, β) VoC <sup>12</sup> and expressing mCherry was generated using standard  
433        molecular biology techniques. Plasmids containing the full-length genome of the  
434        different rSARS-CoV-2 were analyzed by digestion using specific restriction enzymes  
435        and validated by deep sequencing. Oligonucleotides for cloning the Venus or mCherry  
436        FP, or K417N, E484K, and N501Y mutations, are available upon request.

437 **Generation of rSARS-CoV-2 expressing FP**

438 Wild-type (WT, WA-1), Venus (Venus WA-1), and mCherry (mCherry WA-1)  
439 reporter-expressing rSARS-CoV-2, as well as rSARS-CoV-2 encoding the SA B.1.351  
440 (beta,  $\beta$ ) mutations K417N, E484K, and N501Y in the S RBD expressing mCherry  
441 (mCherry SA) were rescued as previously described<sup>21,34</sup>. Briefly, confluent monolayers  
442 of Vero E6 cells ( $1.2 \times 10^6$  cells/well, 6-well plate format, triplicates) were transfected  
443 with 4  $\mu\text{g}$ /well of pBeloBAC11-SARS-CoV-2 (WA-1), -2A/Venus, -2A/mCherry, or -  
444 2A/mCherry-SA-RBD plasmids using Lipofectamine 2000 (Thermo Fisher). After 24 h  
445 post-transfection, media was exchanged with post-infection (pi) media (DMEM  
446 containing 2% FBS), and 24 h later cells were scaled up to T75 flasks and incubated for  
447 72 h at 37°C. Viral rescues were first confirmed under a brightfield microscope by  
448 assessing cytopathic effect (CPE) before supernatants were collected, aliquoted, and  
449 stored at -80°C. To confirm the rescue of rSARS-CoV-2, Vero E6 cells ( $1.2 \times 10^6$   
450 cells/well, 6-well plates, triplicates) were infected with virus-containing tissue culture  
451 supernatants and incubated at 37°C in a 5% CO<sub>2</sub> incubator for 48 h. Viruses were  
452 detected by fluorescence or immunostaining with a SARS-CoV N protein cross reactive  
453 mouse (m)MAb (1C7C7). Plaque assays were used to determine viral titers (plaque  
454 forming units, PFU/ml). Viral stocks were generated by infecting fresh monolayers of  
455 Vero E6 cells at low multiplicity of infection (MOI, 0.0001) for 72 h before aliquoted and  
456 stored at -80°C.

457 **Sequencing**

458 To confirm the identity of the rescued rSARS-CoV-2 mCherry SA, total RNA from  
459 infected (MOI 0.01) Vero E6 cells ( $1.2 \times 10^6$  cells/well, 6-well format, triplicates) was

460 extracted using TRIzol reagent (Thermo Fisher Scientific), and used in RT-PCR  
461 reactions to amplify a fragment of 1,174 bp around the RBD of the S gene. RT-PCR  
462 was done using SuperScript II reverse transcriptase (Thermo Fisher Scientific) and  
463 Expand high-fidelity PCR system (Sigma-Aldrich). RT-PCR products were purified on  
464 0.7% agarose gel and subjected to Sanger sequencing (ACGT). All primer sequences  
465 are available upon request.

#### 466 **Immunofluorescence assays**

467 Confluent monolayers of Vero E6 cells ( $1.2 \times 10^6$  cells/well, 6-well format, triplicates)  
468 were mock-infected or infected (MOI 0.01) with WT, Venus-, or mCherry-expressing  
469 rSARS-CoV-2 WA-1 (WA-1, Venus WA-1, or mCherry WA-1, respectively); or rSARS-  
470 CoV-2 mCherry SA. At 48 hours post-infection (hpi), cells were submerged in 10%  
471 neutral buffered formalin at 4°C overnight for fixation and viral inactivation, and then  
472 permeabilized with 0.5% Triton X-100 phosphate-buffered saline (PBS) at room  
473 temperature for 10 min. Thereafter, cells were washed with PBS before blocking with  
474 2.5% bovine albumin serum (BSA) PBS for 1 h. Cells were then incubated with 1 µg/ml  
475 of SARS-CoV anti-N mMAb 1C7C7 in 1% BSA at 37°C for 1 h. Reporter-expressing  
476 rSARS-CoV-2 were detected directly by epifluorescence and using either Alexa Fluor  
477 594 goat anti-mouse IgG (Invitrogen; 1:1,000) or fluorescein isothiocyanate (FITC)-  
478 conjugated goat anti-mouse IgG (Dako; 1:200), depending on whether the viruses  
479 express Venus or mCherry, respectively. Cell nuclei were detected with 4', 6'-diamidino-  
480 2-phenylindole (DAPI, Research Organics). An EVOS M5000 imaging system was used  
481 to acquire representative images (10X magnification).

#### 482 **Viral growth kinetics**

483 Vero E6 cells ( $1.2 \times 10^6$  cells/well, 6-well plate format, triplicates) were infected (MOI  
484 0.01) at 37°C for 1 h. After viral adsorption, cells were washed with PBS and incubated  
485 at 37°C in pi media. At 24, 48, 72, and 96 hpi, fluorescence-positive cells were imaged  
486 with an EVOS M5000 fluorescence microscope for rSARS-CoV-2 expressing Venus or  
487 mCherry FP, and viral titers in the tissue culture supernatants were determined by  
488 plaque assay and immunostaining using the anti-SARS-CoV N mMAb 1C7C7. Mean  
489 values and standard deviation (SD) were calculated with Microsoft Excel software.

#### 490 **Plaque assays and immunostaining**

491 Confluent monolayers of Vero E6 cells ( $2 \times 10^5$  cells/well, 24-well plate format,  
492 triplicates) were infected with WT or reporter-expressing rSARS-CoV-2 for 1 h before  
493 being overlaid with pi media containing 1% agar (Oxoid) and incubated at 37°C in a 5%  
494 CO<sub>2</sub> incubator. After 72 h, cells were fixed in 10% neutral buffered formalin overnight at  
495 4°C. Next, overlays were removed, PBS was added to each well, and fluorescent  
496 plaques were detected and quantified using a ChemiDoc MP imaging system (Bio-Rad).  
497 Cells were then permeabilized with 0.5% Triton X-100 in PBS for 5 min, blocked with  
498 2.5% BSA in PBS for 1 h, and incubated with the SARS-CoV N mMAb 1C7C7, and  
499 plaques detected using a Vectastain ABC kit and DAB HRP Substrate kit (Vector  
500 laboratories) following the manufacturers' instructions.

#### 501 **A bifluorescence-based neutralization assay**

502 The hMAbs used in this study were generated and purified as described<sup>22</sup>. CB6,  
503 REGN10987 and REGN10933 hMAbs were included as controls<sup>25,26</sup>. To test the  
504 neutralizing activity of hMAbs, confluent monolayers of Vero E6 cells ( $4 \times 10^4$  cells/well,  
505 96-plate well format, quadruplicates) were infected (MOI of 0.01 or 0.1) with the

506 indicated rSARS-CoV-2 for 1 h at 37°C. After viral absorption, pi media containing 3-fold  
507 dilutions of the indicated hMAbs (starting concentration of 500 ng/well) were added to  
508 the cells and incubated at 37°C for 48 h. Cells were then fixed in 10% neutral buffered  
509 formalin overnight and washed with PBS, before fluorescence signal was measured and  
510 quantified using a Synergy LX microplate reader and Gen5 data analysis software (Bio-  
511 Tek). The mean and SD of viral infections were calculated from individual wells of three  
512 independent experiments conducted in quadruplicates with Microsoft Excel software.  
513 Non-linear regression curves and NT<sub>50</sub> values were determined using GraphPad Prism  
514 Software (San Diego, CA, USA, Version 8.2.1). Representative images were captured  
515 with an EVOS M5000 Imaging system (Thermofisher) at 10X magnification.

#### 516 **Mouse experiments**

517 All animal protocols were approved by Texas Biomed IACUC (1718MU). Six-to-  
518 eight-week-old female K18 human angiotensin converting enzyme 2 (hACE2)  
519 transgenic mice were purchased from The Jackson Laboratory and maintained in the  
520 Animal Biosafety Laboratory level 3 (ABSL-3) at Texas Biomedical Research Institute.  
521 All mouse procedures were approved by Texas Biomedical Research Institute IACUC.  
522 To assess the *in vivo* efficacy of hMAbs, K18 hACE2 transgenic mice (n=5/group) were  
523 anesthetized with isoflurane and injected (i.p.) with hMAbs IgG isotype control, 1212C2  
524 or 1213H7 (25 mg/kg) using a 1 ml syringe 23-25 gauge 5/8 inch needle 24 h prior to  
525 challenge with rSARS-CoV-2. For viral challenges, mice were anesthetized and  
526 inoculated intranasally (i.n.) with 10<sup>4</sup> plaque forming units (PFU) of the indicated rSARS-  
527 CoV-2 and monitored daily for morbidity as determined by changes in body weight, and  
528 survival. Mice that lost greater than 25% of their initial weight were considered to have

529 reached their experimental endpoint and were humanely euthanized. In parallel, K18  
530 hACE2 transgenic mice (n=3/group) were treated (i.p.) with 1212C2 or 1213H7 hMAbs  
531 and challenged i.n. with  $10^4$  PFU of the indicated rSARS-CoV-2 for viral titer  
532 determination. Viral titers in the lungs of infected mice at days 2 and 4 pi were  
533 determined by plaque assay. *In vivo* fluorescence imaging of mouse lungs was  
534 conducted using an Ami HT *in vivo* imaging system, IVIS (Spectral Instruments). Mice  
535 were euthanized with a lethal dose of Fatal-Plus solution and lungs were surgically  
536 extracted and washed in PBS before imaging in the Ami HT. Images were analyzed with  
537 Aura software to determine radiance with the region of interest (ROI), and fluorescence  
538 signal was normalized to background signal of lungs from mock-infected mice. Bright  
539 field images of lungs were captured using an iPhone X camera. After imaging, lungs  
540 were homogenized using a Precellys tissue homogenizer (Bertin Instruments) in 1 ml of  
541 PBS and centrifuged at 21,500 x g for 10 min to pellet cell debris. Clarified supernatants  
542 were collected and used to determine viral titers by plaque assay. Macroscopic  
543 pathological scoring was determined from the percent of total surface area affected by  
544 congestion, consolidation, and atelectasis of excised lungs, using NIH ImageJ software  
545 as previously described<sup>21,35</sup>.

#### 546 **Statistical analysis**

547 All data are presented as mean values and SD for each group and were analyzed  
548 using Microsoft Excel software. A two-tailed Student *t* test was used to compare the  
549 means between two groups. A *P* value of less than 0.05 ( $P < 0.05$ ) was considered  
550 statistically significant.

#### 551 **Data availability**



552 All of the data supporting the findings of this work can be found within the paper.

553 The raw data are available from the corresponding authors upon request.

554

555

556

557

558

559

560

561

562

563

564

565

566

567

568

569

570

571

572

573

574

575        **ACKNOWLEDGEMENTS**

576        We are grateful to Dr. Thomas Moran at The Icahn School of Medicine at Mount  
577        Sinai for providing the SARS-CoV cross-reactive 1C7C7 N protein mMAb.

578

579        **AUTHOR CONTRIBUTIONS**

580        C.Y. rescued the rSARS-CoV-2 expressing FP; K.C. conducted the *in vitro*  
581        experiments; D.M.V. conducted the bifluorescent neutralization assays; K.C. J.P., J.S.,  
582        and D.M.V. conducted the *in vivo* experiments; J. J. K., M.S.P., and M. R. W. provided  
583        critical reagents; J.C.T., J.S., M.J.L., A.L.G., and R.K.P. deep sequenced the viruses;  
584        K.C. and D.M.V. drafted the manuscript; J.B.T. provide support for the *in vitro* and *in*  
585        *vivo* studies at the BSL3 and ABSL3 facilities, respectively, at Texas Biomedical  
586        Research Institute. L.M-S. conceived the study, revised, and finalized the manuscript.  
587        All authors review and approve the manuscript.

588

589        **COMPETING INTERESTS**

590        J.-G.P., M.S.P., M.R.W., J.J.K., and L.M.-S. are co-inventors on a patent that  
591        includes claims related to some of the hMAbs described in the manuscript.

592

593

594

595

596

597

598 **FIGURE LEGENDS**

599 **Figure 1. Generation and characterization of Venus and mCherry-expressing**

600 **rSARS-CoV-2. A) Schematic representation of Venus and mCherry rSARS-CoV-2:**

601 Reporter genes Venus (green) or mCherry (red) were inserted upstream of the N  
602 protein (dark blue), flanked by the PTV-1 2A autocleavage sequence (light blue). **B-C)**

603 **Venus and mCherry expression from rSARS-CoV-2:** Vero E6 cells (6-well plate

604 format,  $10^6$  cells/well, triplicates) were mock-infected or infected (MOI 0.01) with rSARS-

605 CoV-2 Venus or rSARS-CoV-2 mCherry (**B**). At 24 hpi, cells were fixed in 10% neutral

606 buffered formalin and visualized under a fluorescence microscope for Venus or mCherry

607 expression. A cross-reactive mMAb against SARS-CoV N protein (1C7C7) was used for

608 staining of infected cells (**C**). DAPI was used for nuclear staining. FL: fluorescent field.

609 **D-F) Multi-step growth kinetics:** Vero E6 cells (6-well plate format,  $10^6$  cells/well,

610 triplicates) were mock-infected or infected (MOI 0.01) with rSARS-CoV-2 Venus and

611 rSARS-CoV-2 mCherry, alone or together, and tissue cultured supernatants were

612 collected at the indicated times pi to assess viral titers using standard plaque assay (**D**).

613 The amount of Venus- and/or mCherry-positive rSARS-CoV-2 at the same times pi in

614 cells infected with both viruses were also determined using plaque assay (**E**). Images of

615 infected cells under a fluorescent microscope at the same times pi are shown (**F**). **G)**

616 **Plaque assays:** Vero E6 cells (6-well plate format,  $10^6$  cells/well, triplicates) were mock-

617 infected or infected with ~20 PFU of rSARS-CoV-2, rSARS-CoV-2 Venus, rSARS-CoV-

618 2 mCherry, or both rSARS-CoV-2 Venus and rSARS-CoV-2 mCherry. At 72 hpi,

619 fluorescent plaques were assessed using a Chemidoc instrument. Viral plaques were

620 also immunostained with the SARS-CoV N protein 1C7C7 cross-reactive mMAb.

621 Fluorescent green, red and merge imaged are shown. Representative images are  
622 shown for panels B, C and F and G. Scale bars = 300  $\mu$ m.

623 **Figure 2. A bifluorescent-based assay to identify NABs:** Confluent monolayers of  
624 Vero E6 cells ( $4 \times 10^4$  cells/well, 96-plate well format, quadruplicates) were infected  
625 (MOI 0.1) with rSARS-CoV-2 Venus (**A and D**), rSARS-CoV-2 mCherry (**B and E**), or  
626 both rSARS-CoV-2 Venus and rSARS-CoV-2 mCherry (**C and F**). After 1 h infection, pi  
627 media containing 3-fold serial dilutions of 1212C2 (**A-C**) or 1213H7 (**D-F**) hMAbs  
628 (starting concentration 500 ng) was added to the cells. At 48 hpi, cells were fixed with  
629 10% neutral buffered formalin and levels of fluorescence expression were quantified in  
630 a fluorescent plate reader and analyzed using Gen5 data analysis software (BioTek).  
631 The NT<sub>50</sub> values of 1212C2 and 1213H7 hMAbs for each virus, alone or in combination,  
632 were determined using GraphPad Prism. Dashed lines indicate 50% viral neutralization.  
633 Data are means and SD from quadruplicate wells. Representative images are shown.  
634 Scale bars = 300  $\mu$ m.

635 **Figure 3. Generation and characterization of rSARS-CoV-2 mCherry SA. A)**

636 **Schematic representation of rSARS-CoV-2 mCherry SA:** The genome of a rSARS-  
637 CoV-2 Venus (top) and the rSARS-CoV-2 with the three mutations (K417N, E484K, and  
638 N501Y) present in the S RBD of the SA B.1.351 (beta,  $\beta$ ) VoC expressing mCherry  
639 (bottom) is shown. **B) Sequencing of rSARS-CoV-2 mCherry SA:** Sanger sequencing  
640 results of the rSARS-CoV-2 Venus (top) and the rSARS-CoV-2 mCherry SA with the  
641 K417N, E484K, and N501Y substitutions in the RBD of the S glycoprotein (bottom) are  
642 indicated. **C) Reporter gene expression:** Vero E6 cells (6-well plate format,  $10^6$   
643 cells/well, triplicates) were mock-infected or infected (MOI 0.01) with rSARS-CoV-2,

644 rSARS-CoV-2 Venus, or rSARS-CoV-2 mCherry SA. Infected cells were fixed in 10%  
645 neutral buffered formalin at 24 hpi and visualized under a fluorescence microscope for  
646 Venus or mCherry expression. **D-F) Multicycle growth kinetics:** Vero E6 cells (6-well  
647 plate format,  $10^6$  cells/well, triplicates) were mock-infected or infected (MOI 0.01) with  
648 rSARS-CoV-2 Venus, rSARS-CoV-2 mCherry SA, or both rSARS-CoV-2 Venus and  
649 rSARS-CoV-2 mCherry SA. Tissue cultured supernatants were collected at the  
650 indicated times pi to assess viral titers using standard plaque assay (**D**). The amount of  
651 Venus- and/or mCherry-positive plaques at the same times pi were determined using  
652 fluorescent microscopy (**E**). Images of infected cells under a fluorescent microscope at  
653 the same times pi are shown (**F**). **G) Plaque assays:** Vero E6 cells (6-well plate format,  
654  $10^6$  cells/well, triplicates) were mock-infected or infected with ~20 PFU of rSARS-CoV-2,  
655 rSARS-CoV-2 Venus, rSARS-CoV-2 mCherry SA, or both rSARS-CoV-2 Venus and  
656 rSARS-CoV-2 mCherry SA. At 72 hpi, fluorescent plaques were assessed using a  
657 Chemidoc instrument. Viral plaques were also immunostained with the SARS-CoV N  
658 protein 1C7C7 cross-reactive mMAb. Fluorescent green, red and merge imaged as  
659 shown. Representative images are shown for panels C, F and G. Scale bars = 300  $\mu$ m.

660 **Figure 4. A bifluorescent-based assay to identify SARS-CoV-2 broadly NAbs:**

661 Confluent monolayers of Vero E6 cells ( $4 \times 10^4$  cells/well, 96-plate well format,  
662 quadruplicates) were infected (MOI 0.1) with rSARS-CoV-2 Venus (**A and D**), rSARS-  
663 CoV-2 mCherry SA (MOI 0.01) (**B and E**), or both rSARS-CoV-2 Venus (MOI 0.1) and  
664 rSARS-CoV-2 mCherry SA (MOI 0.01) (**C and F**). After 1 h infection, pi media  
665 containing 3-fold serial dilutions of 12C2C2 (**A-C**) or 1213H7 (**D-F**) hMAbs (starting  
666 concentration 500 ng) was added to the cells. At 48 hpi, cells were fixed with 10%

667 neutral buffered formalin and levels of fluorescence expression were quantified in a  
668 fluorescent plate reader and analyzed using Gen5 data analysis software (BioTek). The  
669  $NT_{50}$  values of 1212C2 and 1213H7 hMAbs for each virus, alone or in combination,  
670 were determined using GraphPad Prism. Dashed lines indicate 50% viral neutralization.  
671 Data are means and SD from quadruplicate wells. Representative images are shown.  
672 Scale bars = 300  $\mu$ m.

673 **Figure 5. Identification of SARS-CoV-2 broadly NAbS using the bifluorescent-**  
674 **based assay:** Confluent monolayers of Vero E6 cells ( $4 \times 10^4$  cells/well, 96-plate well  
675 format, quadruplicates) were co-infected with rSARS-CoV-2 Venus (MOI 0.1) and  
676 rSARS-CoV-2 mCherry SA (MOI 0.01). After 1 h infection, pi media containing 3-fold  
677 serial dilutions (starting concentration 500 ng) of the indicated hMAbs was added to the  
678 cells. At 48 hpi, cells were fixed with 10% neutral buffered formalin and levels of  
679 fluorescence were quantified using a fluorescent plate reader and analyzed using Gen5  
680 data analysis software (BioTek). The  $NT_{50}$  values of each of the hMAbs was determined  
681 using GraphPad Prism. Dashed lines indicate 50% viral neutralization. Data are means  
682 and SD from quadruplicate wells. Representative images are shown. Scale bars = 300  
683  $\mu$ m.

684 **Figure 6. Prophylactic activity of 1212C2 and 1213H7 against rSARS-CoV-2 Venus**  
685 **and rSARS-CoV-2 mCherry SA, alone or in combination, in K18 hACE2 transgenic**  
686 **mice:** Six-to-eight-week-old female K18 hACE2 transgenic mice (n=5) were treated  
687 (i.p.) with 25 mg/kg of IgG isotype control, hMAb 1212C2, or hMAb 1213H7 and infected  
688 with  $10^4$  PFU of rSARS-CoV-2 Venus (left), rSARS-CoV-2 mCherry SA (middle) or both,  
689 rSARS-CoV-2 Venus and rSARS-CoV-2 mCherry SA (right). Mice were monitored for

690 12 days for changes in body weight (**A**) and survival (**B**). Data represent the means and  
691 SD of the results determined for individual mice.

692 **Figure 7. Kinetics of fluorescent expression in the lungs of K18 hACE2 transgenic**  
693 **mice treated with 1212C2 or 1213H7 hMAbs and infected with rSARS-CoV-2**

694 **Venus and rSARS-CoV-2 mCherry SA:** Six-to-eight-week-old female K18 hACE2  
695 transgenic mice (n=3) were injected (i.p.) with 25 mg/kg of an IgG isotype control, hMAb  
696 1212C2, or hMAb 1213H7 and infected with  $10^4$  PFU of rSARS-CoV-2 Venus (top),  
697 rSARS-CoV-2 mCherry SA (middle), or both, rSARS-CoV-2 Venus and rSARS-CoV-2  
698 mCherry SA (bottom). At days 2 and 4 pi, lungs were collected to determine Venus and  
699 mCherry fluorescence expression using an Ami HT imaging system (**A**). BF, bright field.  
700 Venus and mCherry radiance values were quantified based on the mean values for the  
701 regions of interest in mouse lungs (**B**). Mean values were normalized to the  
702 autofluorescence in mock-infected mice at each time point and were used to calculate  
703 fold induction. Gross pathological scores in the lungs of mock-infected and rSARS-CoV-  
704 2-infected K18 hACE2 transgenic mice were calculated based on the % area of the  
705 lungs affected by infection.

706 **Figure 8. Viral titers in the lungs, nasal turbinate and brain of K18 hACE2**  
707 **transgenic mice treated with 1212C2 or 1213H7 hMAbs and infected with rSARS-**

708 **CoV-2 Venus and rSARS-CoV-2 mCherry SA:** Six-to-eight-week-old female K18  
709 hACE2 transgenic mice (n=3) injected (i.p.) with 25 mg/kg of an IgG isotype control,  
710 hMAb 1212C2, or hMAb 1213H7, and infected with  $10^4$  PFU of rSARS-CoV-2 Venus  
711 (**A**), rSARS-CoV-2 mCherry SA (**B**), or both rSARS-CoV-2 Venus and rSARS-CoV-2  
712 mCherry SA (**C**). Viral titers in the lungs (top), nasal turbinate (middle) and brain

713 (bottom) at days 2 and 4 pi were determined by plaque assay in Vero E6 cells. Bars  
714 indicates the mean and SD of lung virus titers. Dotted lines indicate the limit of  
715 detection. **D)** Quantification of rSARS-CoV-2 Venus and rSARS-CoV-2 mCherry SA in  
716 the lungs (top), nasal turbinate (middle) and brain (bottom) from mice co-infected with  
717 both rSARS-CoV-2 Venus and rSARS-CoV-2 mCherry SA at days 2 and 4 pi.

718

719

720

721

722

723

724

725

726

727

728

729

730

731

732

733

734

735



736 **REFERENCES**

- 737 1 Zhu, N. *et al.* A Novel Coronavirus from Patients with Pneumonia in China, 2019.  
738 *N. Engl. J. Med.* **382**, 727-733, doi:10.1056/NEJMoa2001017 (2020).
- 739 2 Dong, E., Du, H. & Gardner, L. An interactive web-based dashboard to track  
740 COVID-19 in real time. *Lancet Infect Dis* **20**, 533-534, doi:10.1016/S1473-  
741 3099(20)30120-1 (2020).
- 742 3 Wang, M. *et al.* Remdesivir and chloroquine effectively inhibit the recently  
743 emerged novel coronavirus (2019-nCoV) in vitro. *Cell Res* **30**, 269-271,  
744 doi:10.1038/s41422-020-0282-0 (2020).
- 745 4 Beigel, J. H. *et al.* Remdesivir for the Treatment of Covid-19 - Final Report. *N.*  
746 *Engl. J. Med.* **383**, 1813-1826, doi:10.1056/NEJMoa2007764 (2020).
- 747 5 Jones, B. E. *et al.* The neutralizing antibody, LY-CoV555, protects against SARS-  
748 CoV-2 infection in nonhuman primates. *Sci Transl Med* **13**,  
749 doi:10.1126/scitranslmed.abf1906 (2021).
- 750 6 Polack, F. P. *et al.* Safety and Efficacy of the BNT162b2 mRNA Covid-19  
751 Vaccine. *New England Journal of Medicine* **383**, 2603-2615,  
752 doi:10.1056/NEJMoa2034577 (2020).
- 753 7 Oliver, S. E. *et al.* The Advisory Committee on Immunization Practices' Interim  
754 Recommendation for Use of Moderna COVID-19 Vaccine - United States,  
755 December 2020. *MMWR Morb Mortal Wkly Rep* **69**, 1653-1656,  
756 doi:10.15585/mmwr.mm695152e1 (2021).
- 757 8 Livingston, E. H., Malani, P. N. & Creech, C. B. The Johnson & Johnson Vaccine  
758 for COVID-19. *JAMA* **325**, 1575, doi:10.1001/jama.2021.2927 (2021).

- 759 9 Zhou, D. *et al.* Evidence of escape of SARS-CoV-2 variant B.1.351 from natural  
760 and vaccine-induced sera. *Cell* **184**, 2348-2361.e2346,  
761 doi:10.1016/j.cell.2021.02.037 (2021).
- 762 10 Madhi, S. A. *et al.* Efficacy of the ChAdOx1 nCoV-19 Covid-19 Vaccine against  
763 the B.1.351 Variant. *N Engl J Med* **384**, 1885-1898,  
764 doi:10.1056/NEJMoa2102214 (2021).
- 765 11 Irfan, N. & Chagla, Z. In South Africa, a 2-dose Oxford/AZ vaccine did not  
766 prevent mild to moderate COVID-19 (cases mainly B.1.351 variant). *Ann Intern*  
767 *Med* **174**, JC50, doi:10.7326/ACPJ202105180-050 (2021).
- 768 12 Tegally, H. *et al.* Emergence and rapid spread of a new severe acute respiratory  
769 syndrome-related coronavirus 2 (SARS-CoV-2) lineage with multiple spike  
770 mutations in South Africa. *medRxiv*, 2020.2012.2021.20248640,  
771 doi:10.1101/2020.12.21.20248640 (2020).
- 772 13 Hou, Y. J. *et al.* SARS-CoV-2 Reverse Genetics Reveals a Variable Infection  
773 Gradient in the Respiratory Tract. *Cell* **182**, 429-446 e414,  
774 doi:10.1016/j.cell.2020.05.042 (2020).
- 775 14 Xie, X. *et al.* An Infectious cDNA Clone of SARS-CoV-2. *Cell Host Microbe* **27**,  
776 841-848 e843, doi:10.1016/j.chom.2020.04.004 (2020).
- 777 15 Xie, X. *et al.* A nanoluciferase SARS-CoV-2 for rapid neutralization testing and  
778 screening of anti-infective drugs for COVID-19. *bioRxiv*, 2020.2006.2022.165712,  
779 doi:10.1101/2020.06.22.165712 (2020).
- 780 16 Chiem, K. *et al.* Generation and Characterization of recombinant SARS-CoV-2  
781 expressing reporter genes. *J Virol*, doi:10.1128/JVI.02209-20 (2021).

- 782 17 Nogales, A. *et al.* A novel fluorescent and bioluminescent Bi-Reporter influenza A  
783 virus (BIRFLU) to evaluate viral infections. *J Virol*, doi:10.1128/JVI.00032-19  
784 (2019).
- 785 18 Creanga, A. *et al.* A comprehensive influenza reporter virus panel for high-  
786 throughput deep profiling of neutralizing antibodies. *Nat Commun* **12**, 1722,  
787 doi:10.1038/s41467-021-21954-2 (2021).
- 788 19 Park, J. G. *et al.* Rapid in vitro assays for screening neutralizing antibodies and  
789 antivirals against SARS-CoV-2. *J Virol Methods*, 113995,  
790 doi:10.1016/j.jviromet.2020.113995 (2020).
- 791 20 Ye, C. *et al.* Visualization of SARS-CoV-2 infection dynamic. *bioRxiv*,  
792 2021.2006.2003.446942, doi:10.1101/2021.06.03.446942 (2021).
- 793 21 Ye, C. *et al.* Rescue of SARS-CoV-2 from a Single Bacterial Artificial  
794 Chromosome. *mBio* **11**, doi:10.1128/mBio.02168-20 (2020).
- 795 22 Piepenbrink, M. S. *et al.* Therapeutic activity of an inhaled potent SARS-CoV-2  
796 neutralizing human monoclonal antibody in hamsters. *bioRxiv*,  
797 2020.2010.2014.339150, doi:10.1101/2020.10.14.339150 (2020).
- 798 23 Deshpande, A., Harris, B. D., Martinez-Sobrido, L., Kobie, J. J. & Walter, M. R.  
799 Epitope classification and RBD binding properties of neutralizing antibodies  
800 against SARS-CoV-2 variants of concern. *bioRxiv*, 2021.2004.2013.439681,  
801 doi:10.1101/2021.04.13.439681 (2021).
- 802 24 Horspool, A. M. *et al.* SARS-CoV-2 B.1.1.7 and B.1.351 variants of concern  
803 induce lethal disease in K18-hACE2 transgenic mice despite convalescent  
804 plasma therapy. *bioRxiv*, doi:10.1101/2021.05.05.442784 (2021).

- 805 25 Hansen, J. *et al.* Studies in humanized mice and convalescent humans yield a  
806 SARS-CoV-2 antibody cocktail. *Science* **369**, 1010-1014,  
807 doi:10.1126/science.abd0827 (2020).
- 808 26 Shi, R. *et al.* A human neutralizing antibody targets the receptor-binding site of  
809 SARS-CoV-2. *Nature* **584**, 120-124, doi:10.1038/s41586-020-2381-y (2020).
- 810 27 Oladunni, F. S. *et al.* Lethality of SARS-CoV-2 infection in K18 human  
811 angiotensin-converting enzyme 2 transgenic mice. *Nat Commun* **11**, 6122,  
812 doi:10.1038/s41467-020-19891-7 (2020).
- 813 28 Rambaut, A. *et al.* Preliminary genomic characterisation of an emergent SARS-  
814 CoV-2 lineage in the UK defined by a novel set of spike mutations. *Genom.*  
815 *Epidemiol* (2020).
- 816 29 Faria, N. R. *et al.* Genomics and epidemiology of the P.1 SARS-CoV-2 lineage in  
817 Manaus, Brazil. *Science* **372**, 815-821, doi:10.1126/science.abh2644 (2021).
- 818 30 Faria, N. R. *et al.* Genomics and epidemiology of a novel SARS-CoV-2 lineage in  
819 Manaus, Brazil. *medRxiv*, doi:10.1101/2021.02.26.21252554 (2021).
- 820 31 Yadav, P. D. *et al.* Neutralization of variant under investigation B.1.617 with sera  
821 of BBV152 vaccinees. *Clin Infect Dis*, doi:10.1093/cid/ciab411 (2021).
- 822 32 Martin Webb, L. *et al.* Identification of and Surveillance for the SARS-CoV-2  
823 Variants B.1.427 and B.1.429 - Colorado, January-March 2021. *MMWR Morb*  
824 *Mortal Wkly Rep* **70**, 717-718, doi:10.15585/mmwr.mm7019e2 (2021).
- 825 33 Harvey, W. T. *et al.* SARS-CoV-2 variants, spike mutations and immune escape.  
826 *Nat Rev Microbiol*, doi:10.1038/s41579-021-00573-0 (2021).

- 827 34 Avila-Perez, G., Park, J. G., Nogales, A., Almazan, F. & Martinez-Sobrido, L.  
828 Rescue of Recombinant Zika Virus from a Bacterial Artificial Chromosome cDNA  
829 Clone. *J Vis Exp*, doi:10.3791/59537 (2019).
- 830 35 Jensen, E. C. Quantitative analysis of histological staining and fluorescence  
831 using ImageJ. *Anat Rec (Hoboken)* **296**, 378-381, doi:10.1002/ar.22641 (2013).  
832

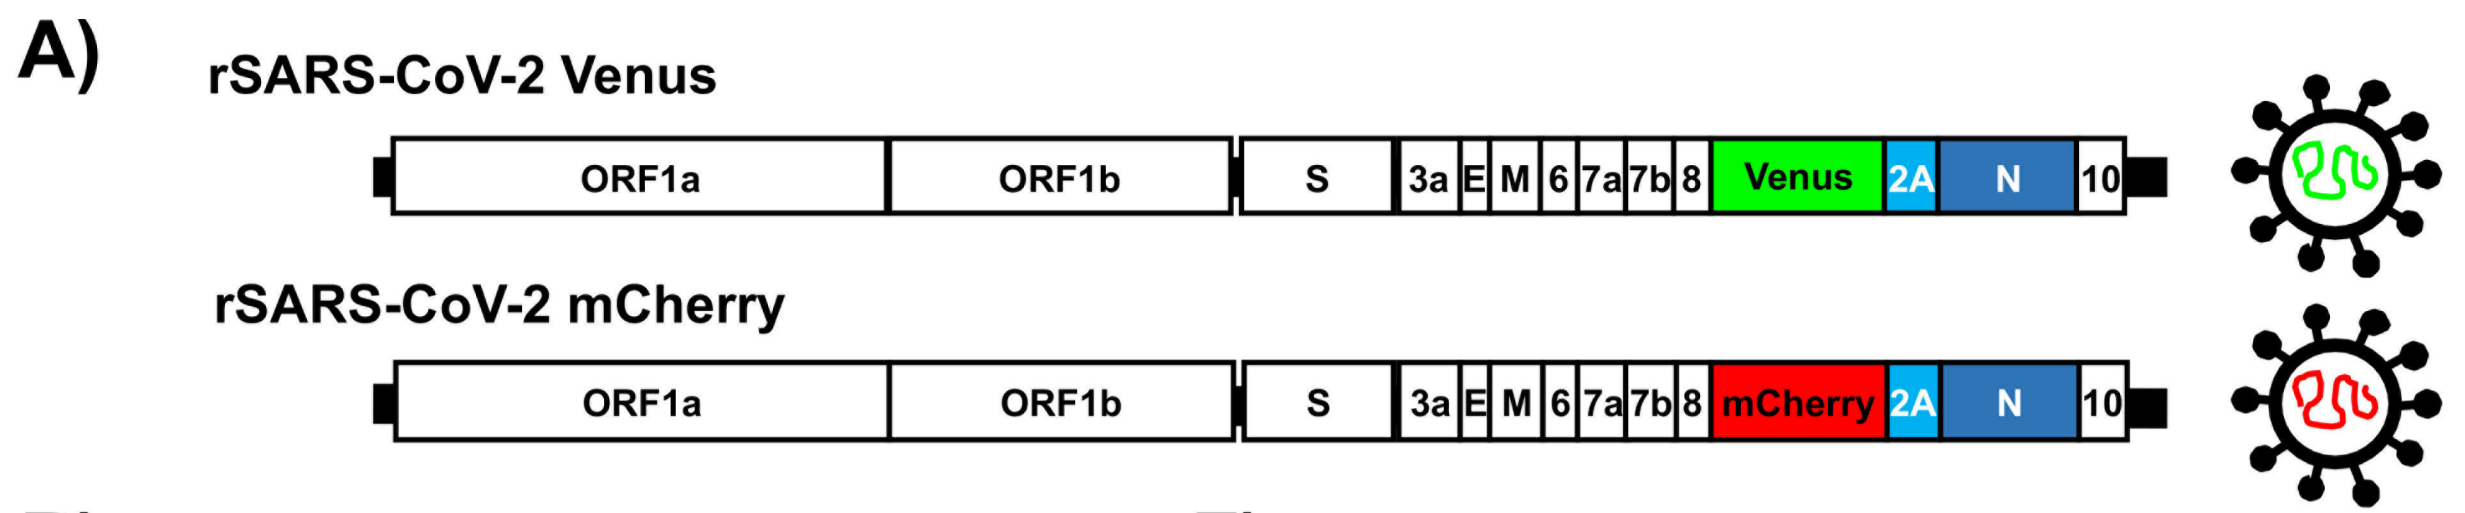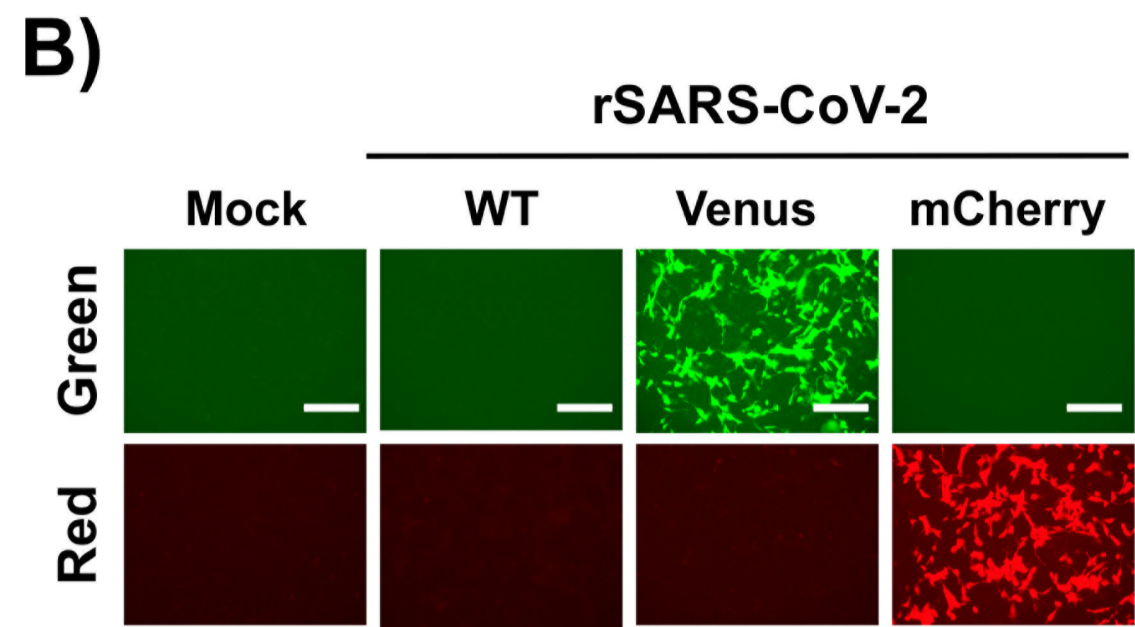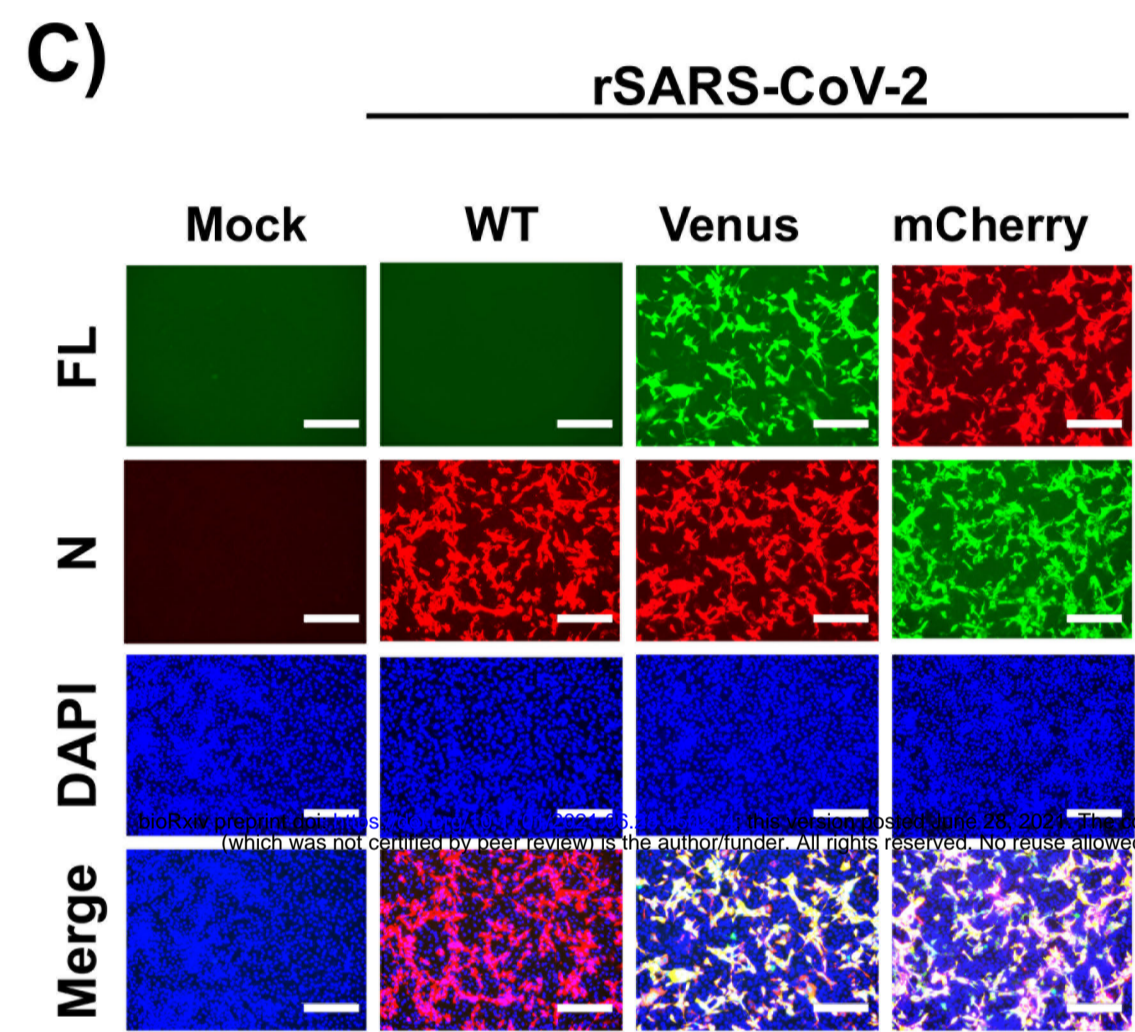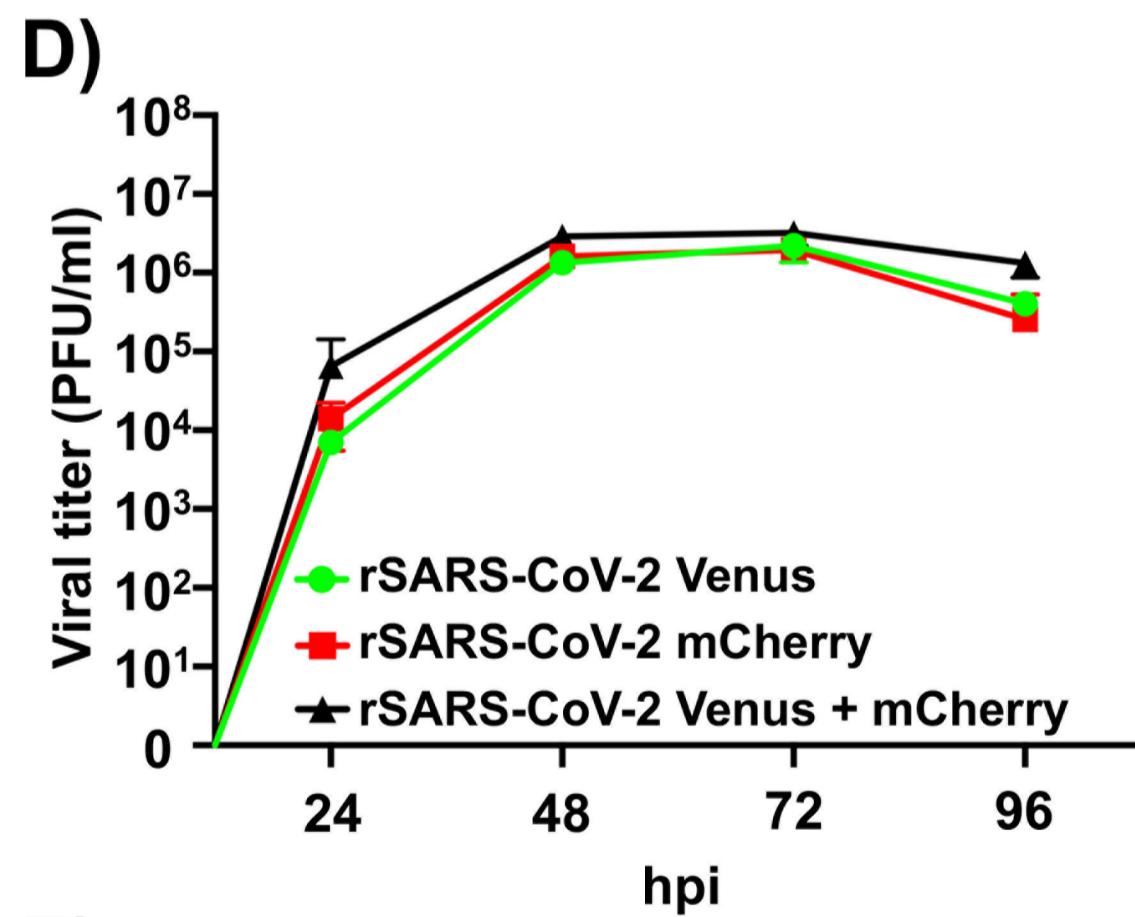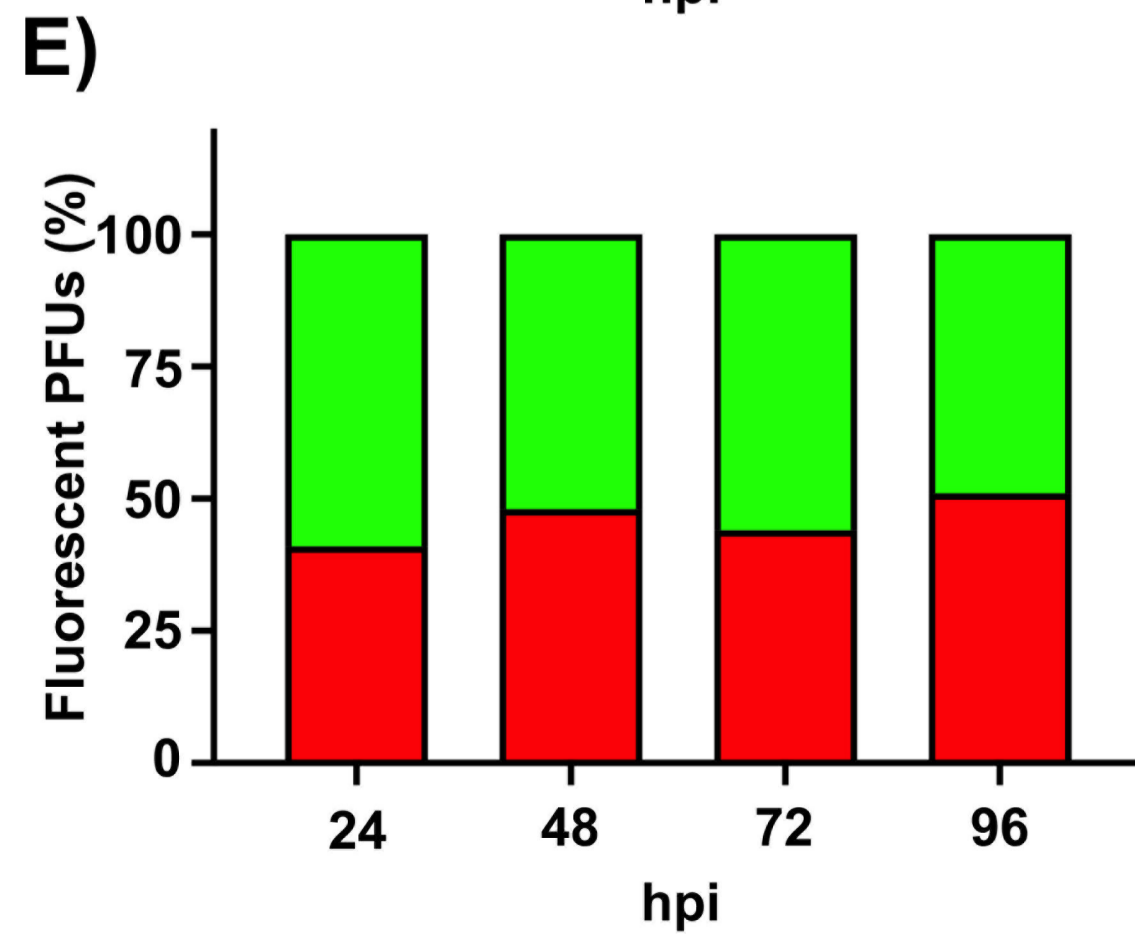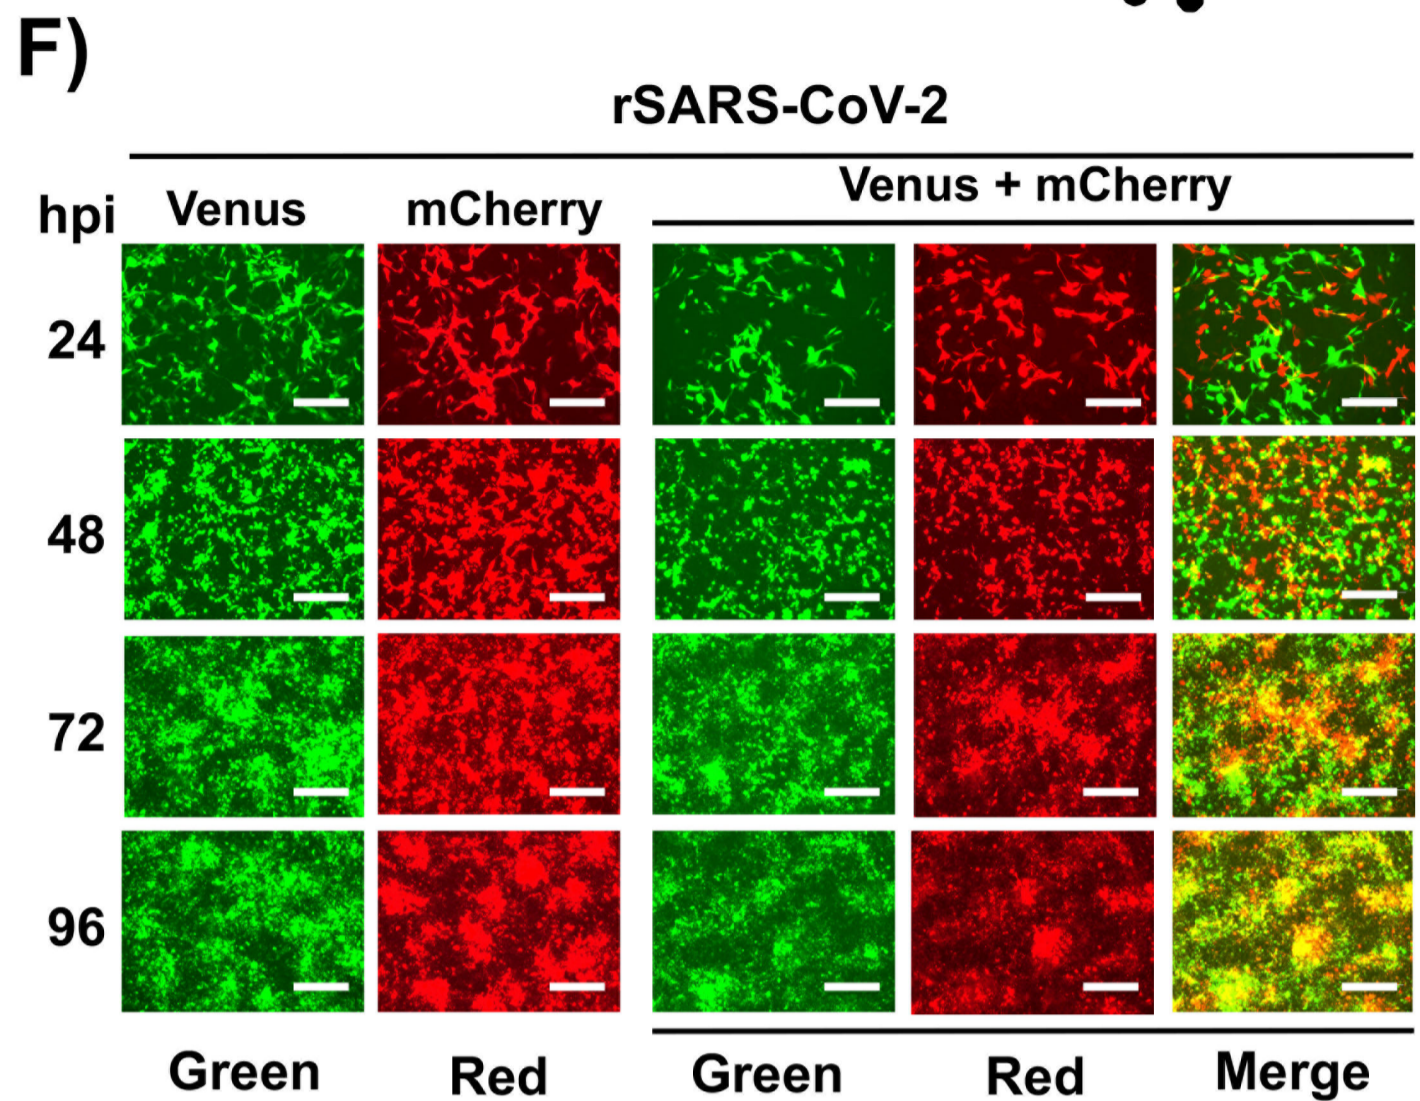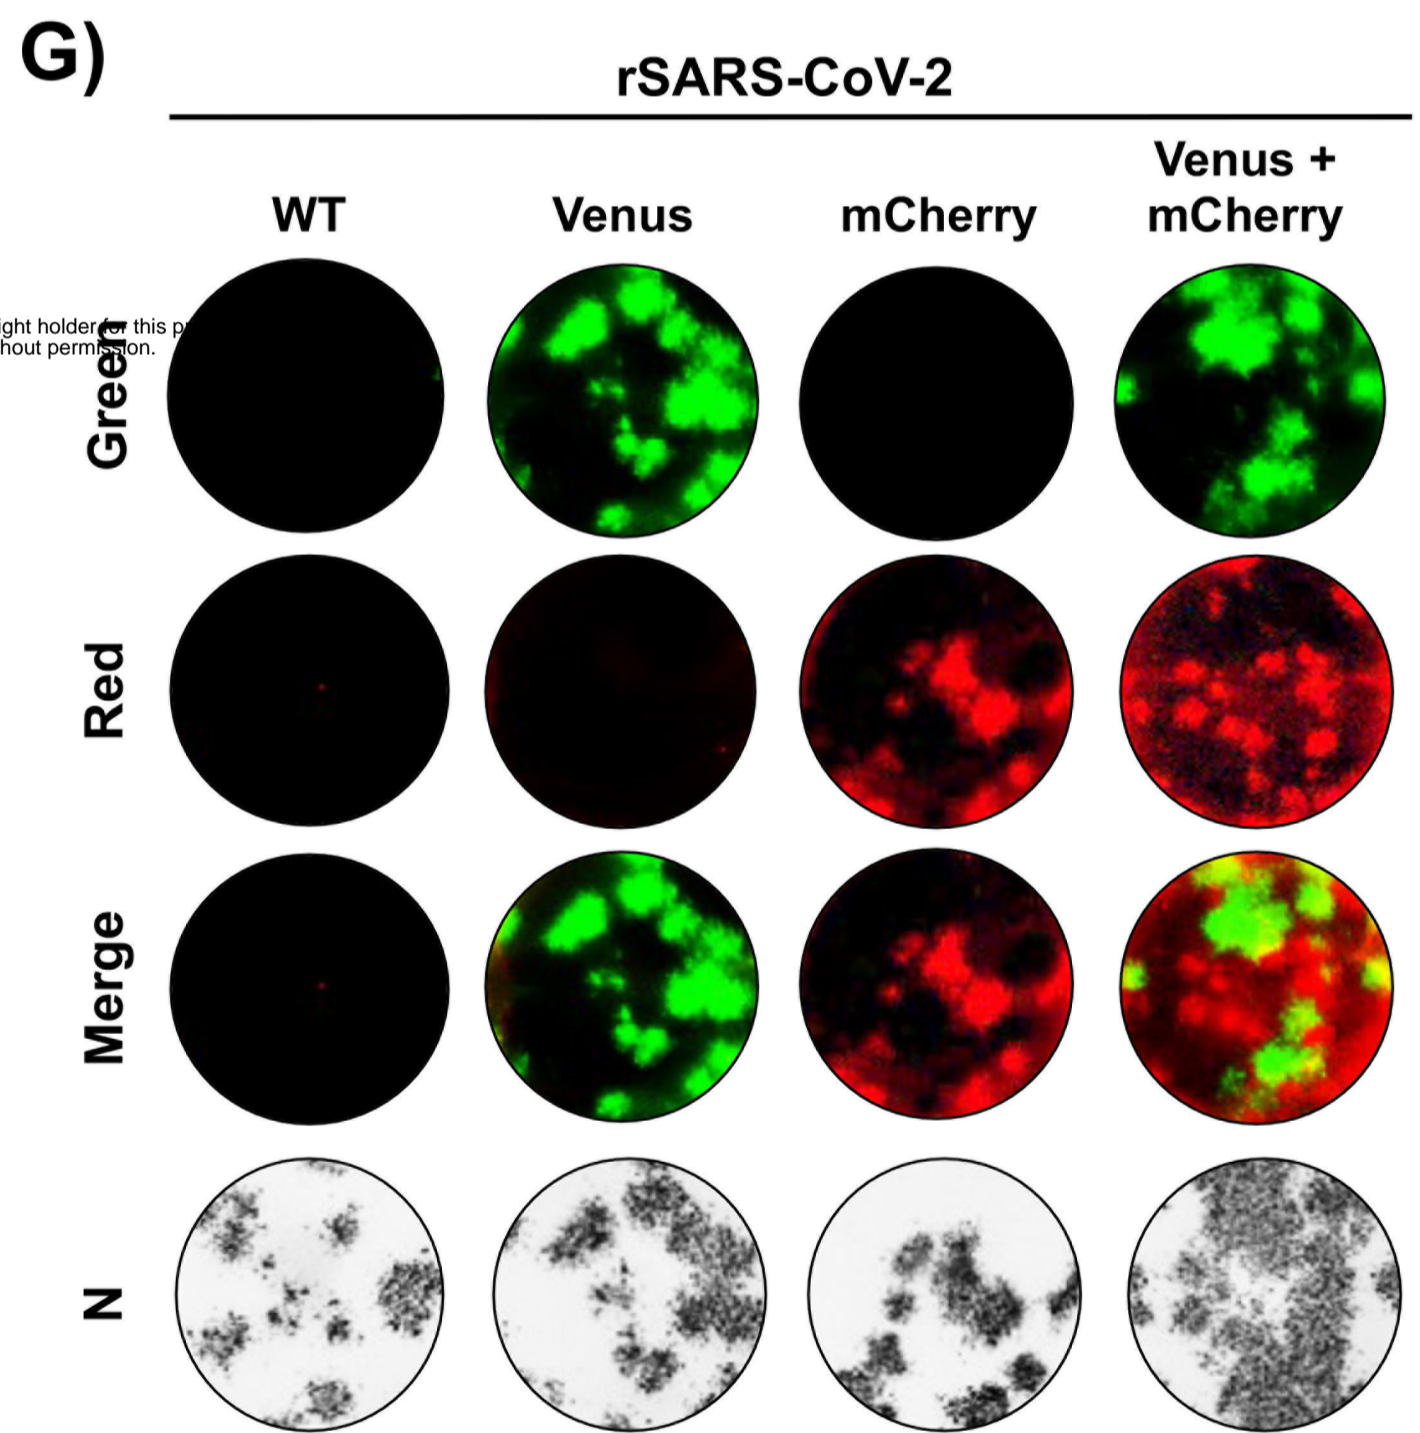

A)

1212C2

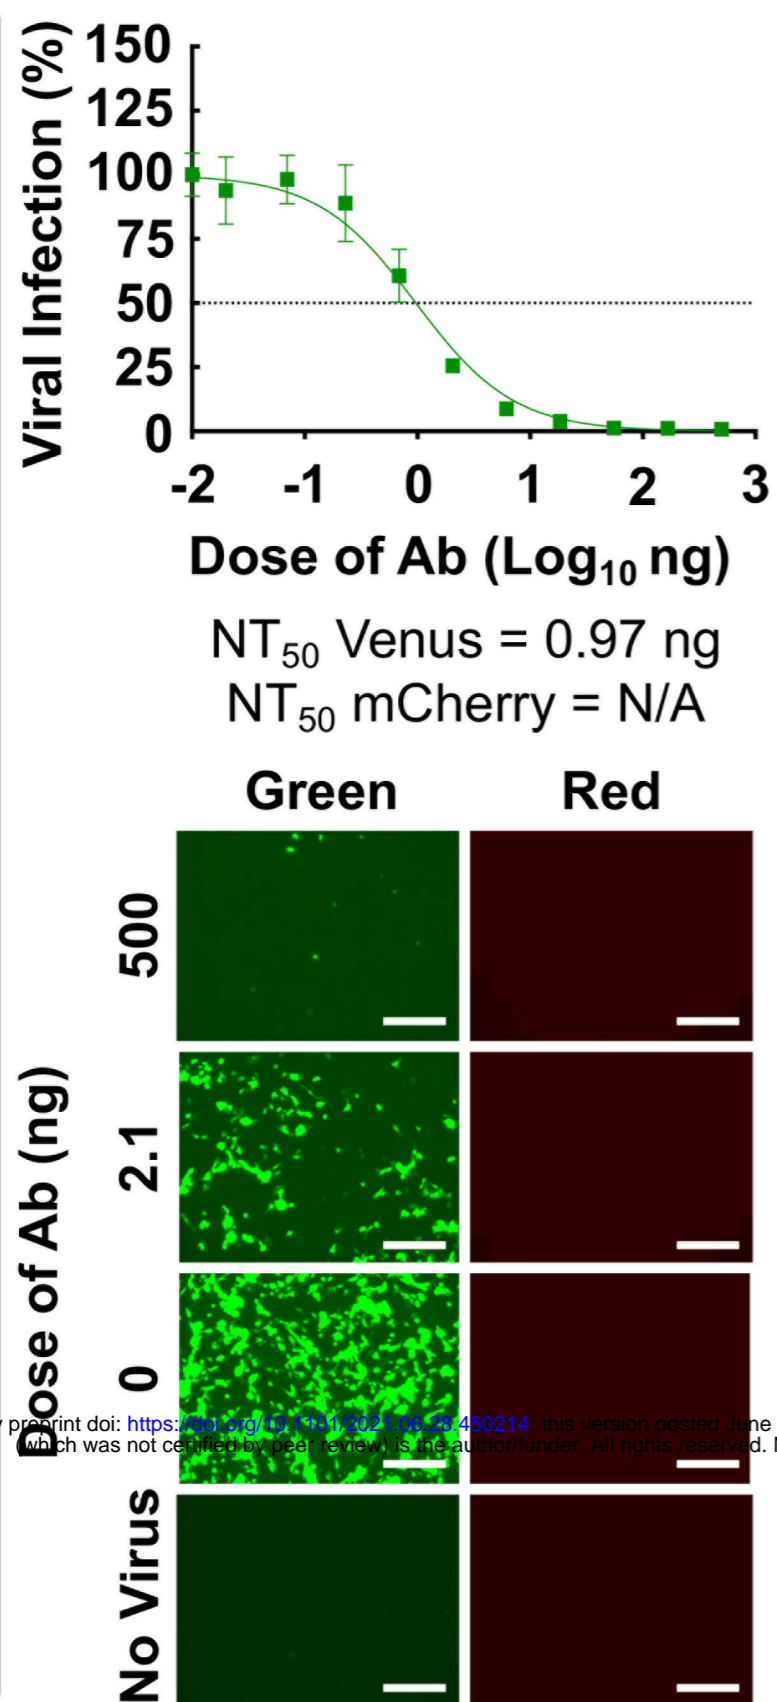

B)

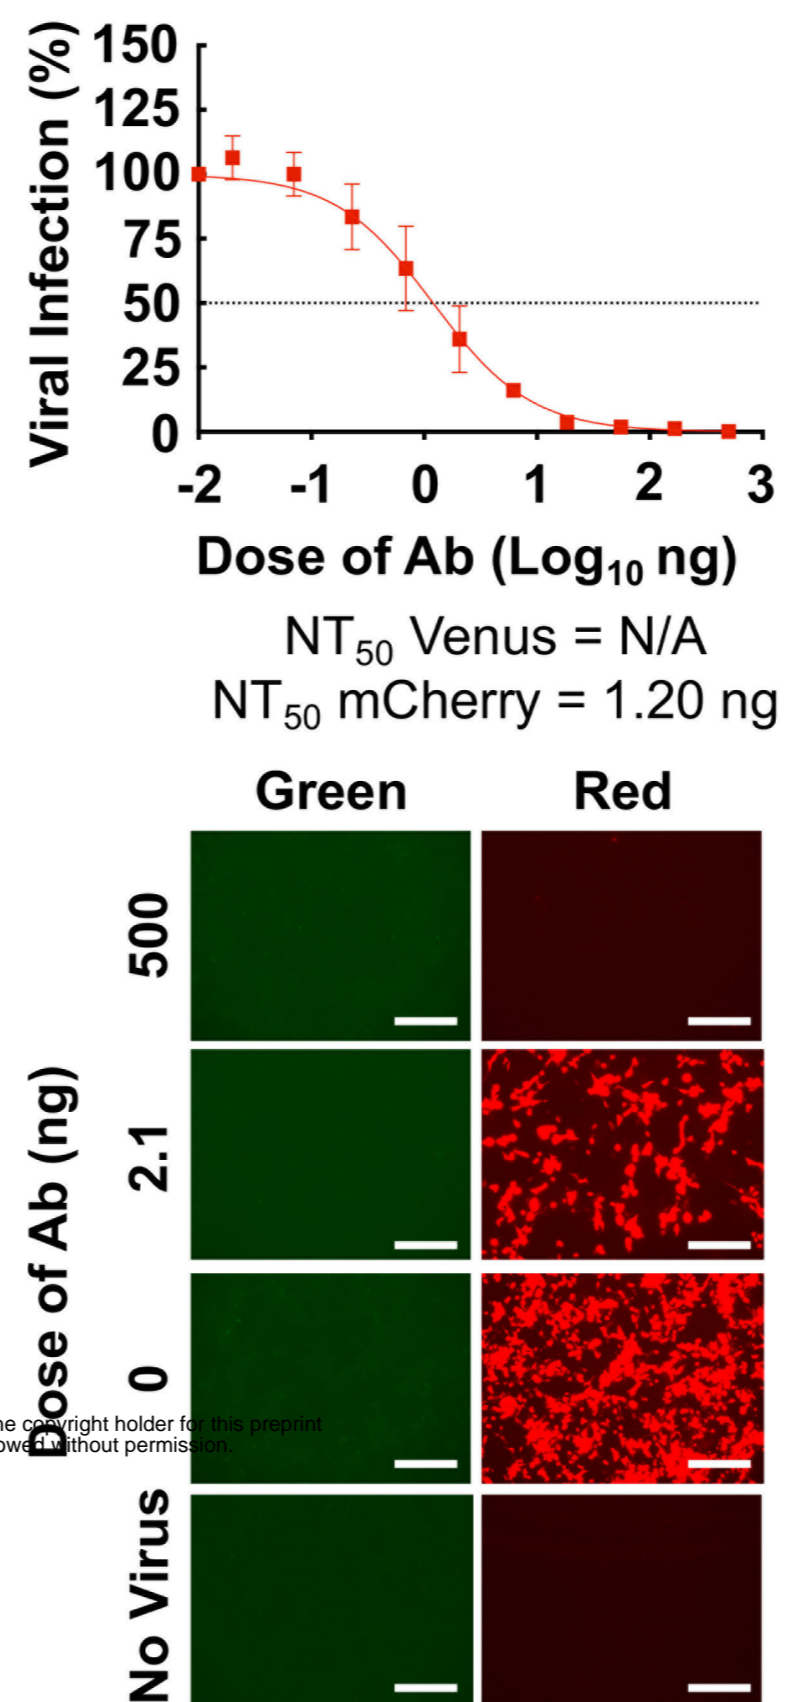

C)

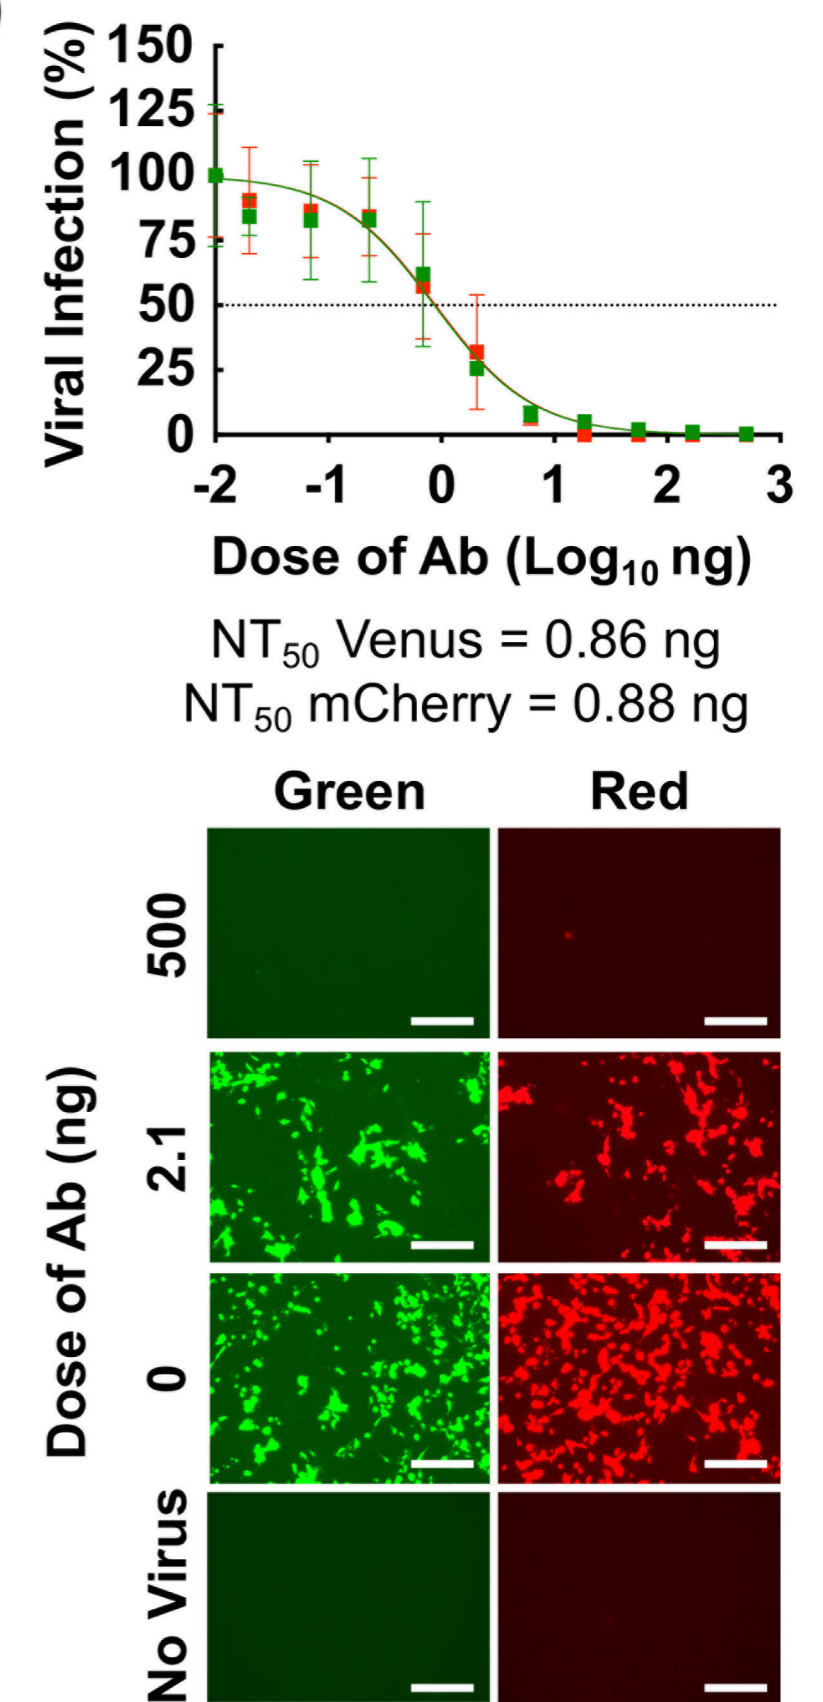

D)

1213H7

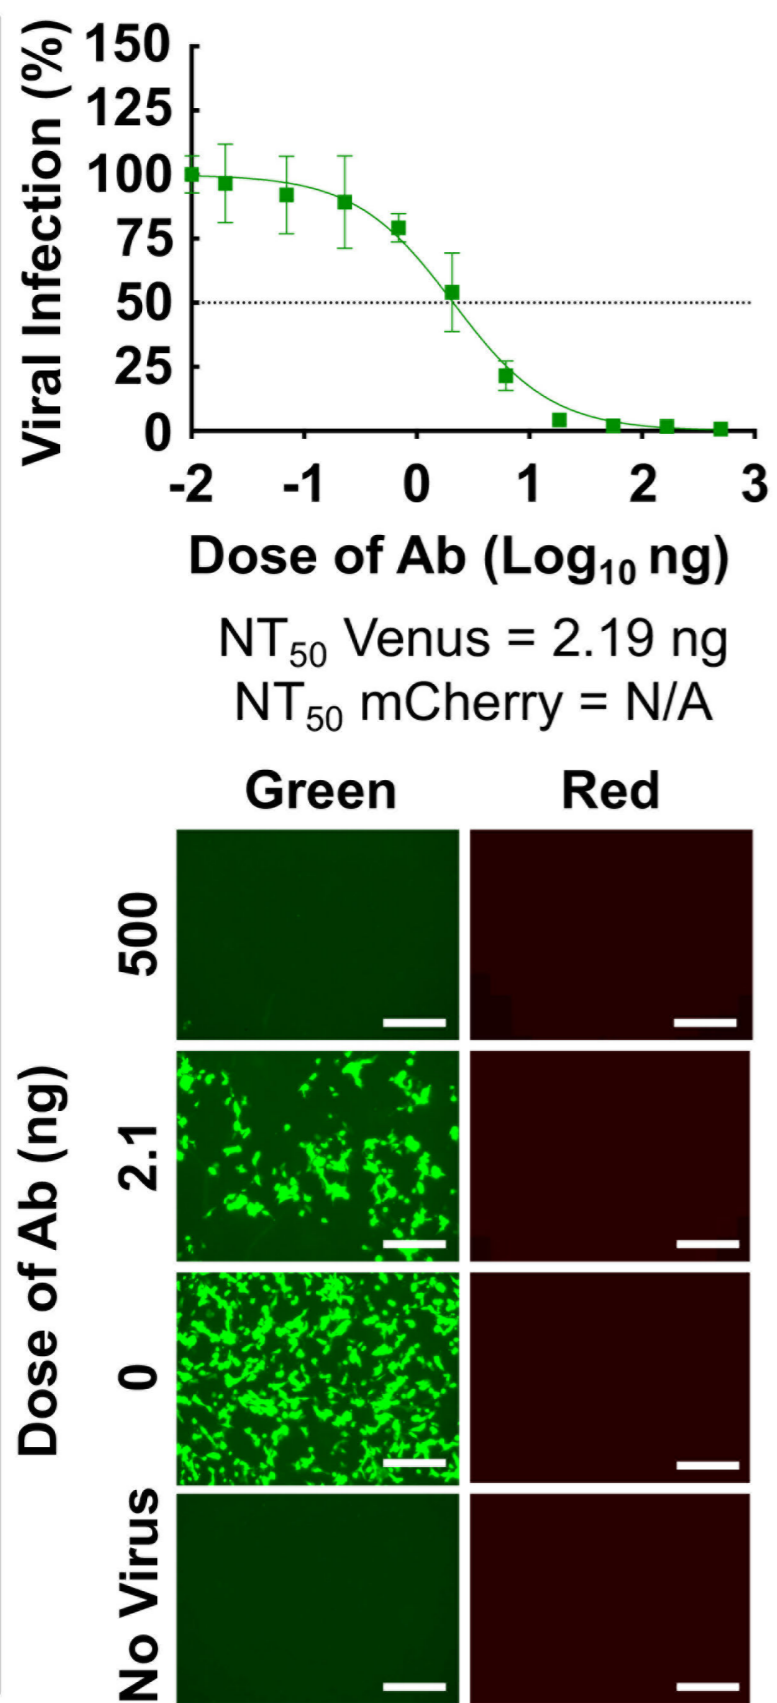

E)

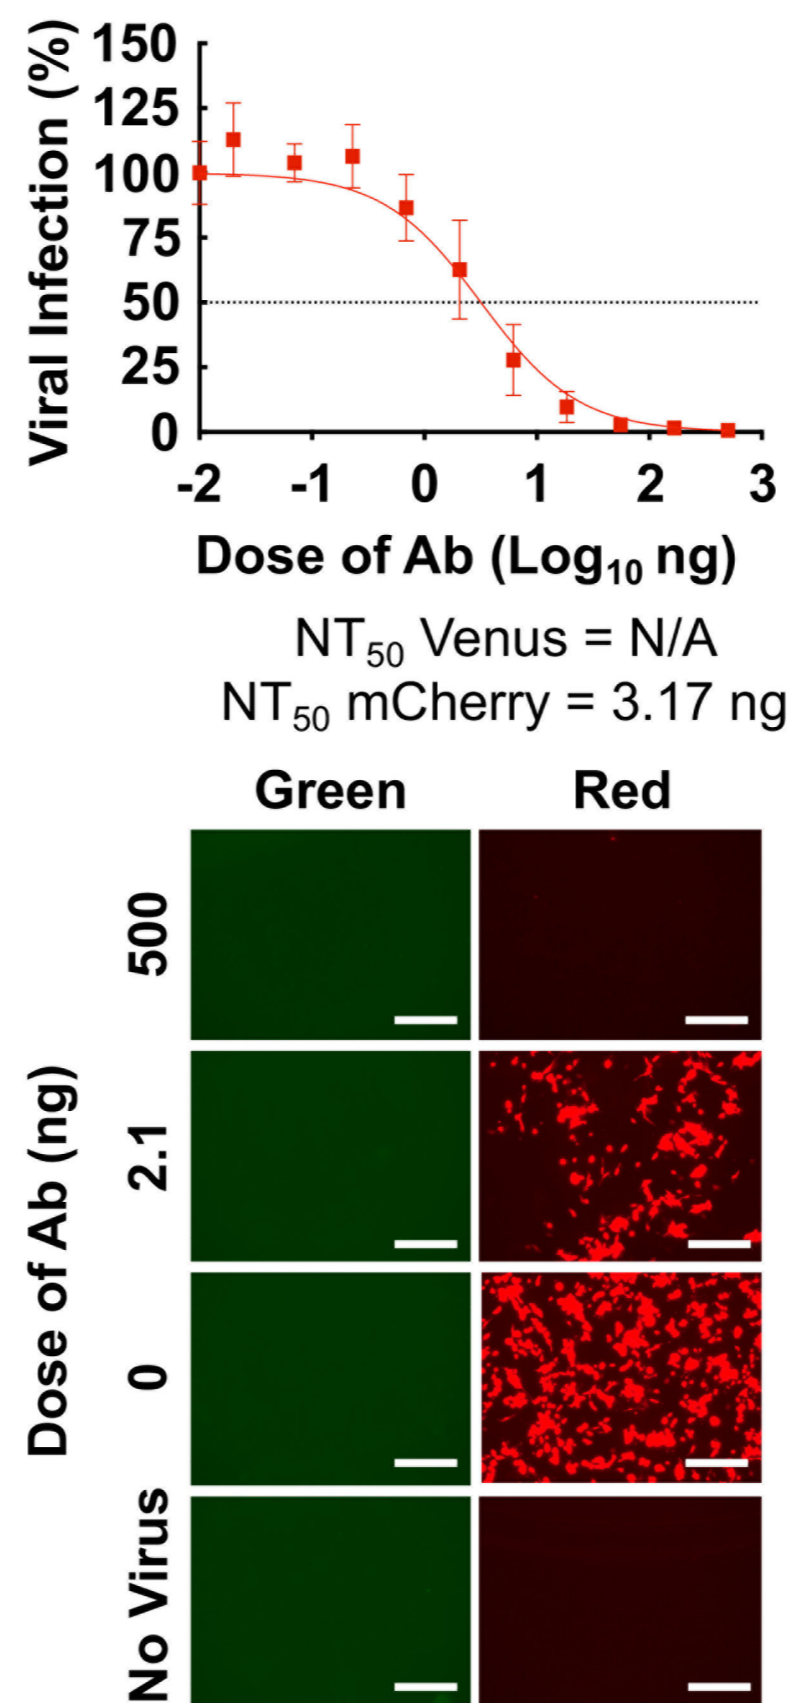

F)

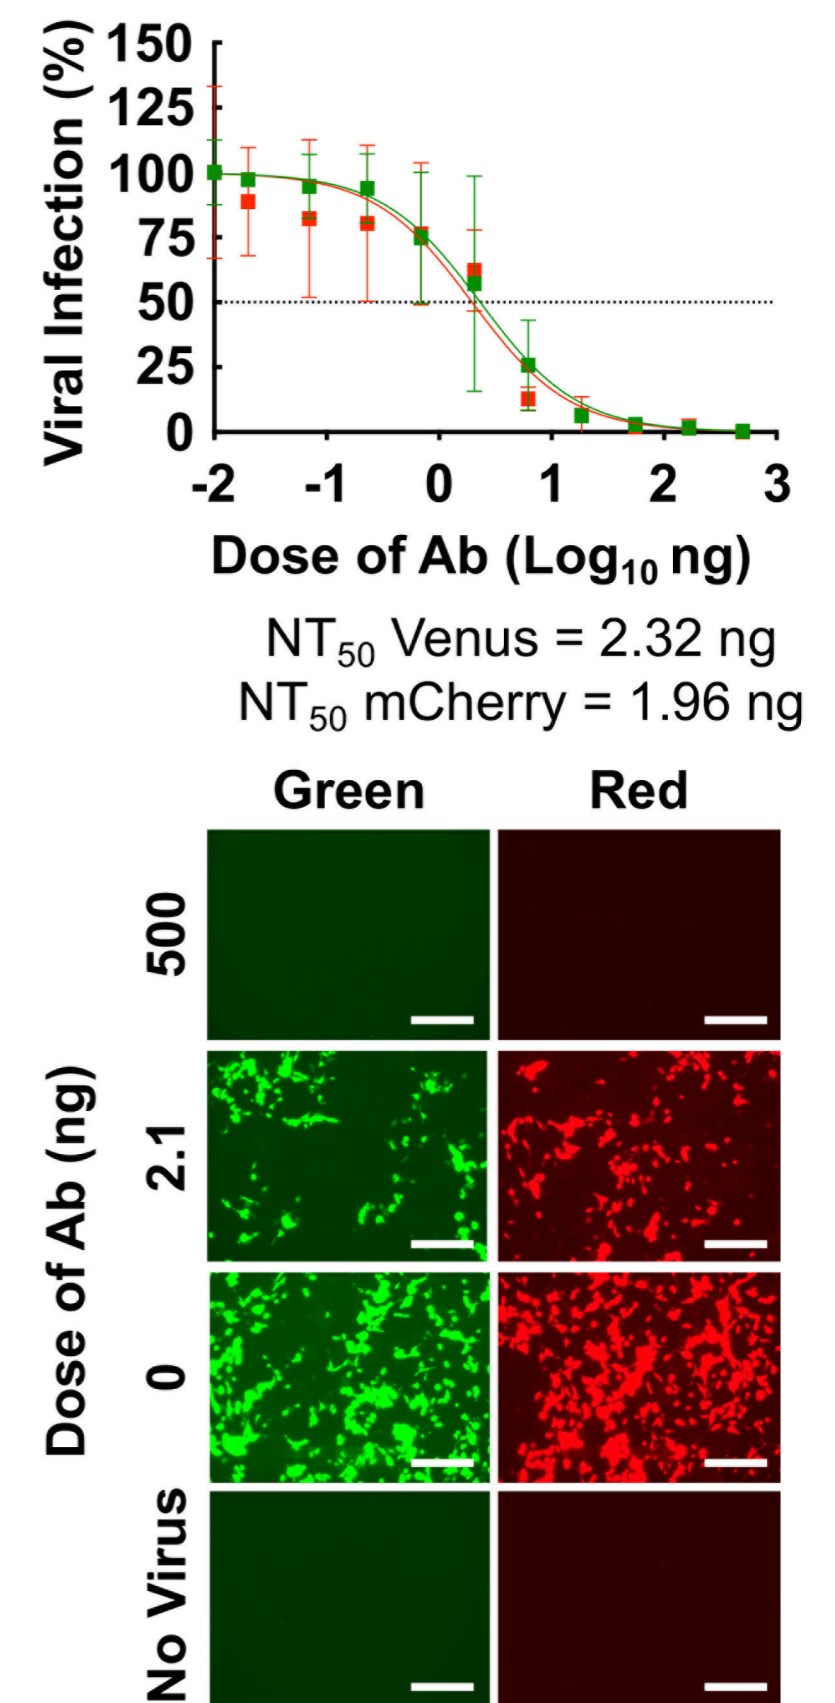

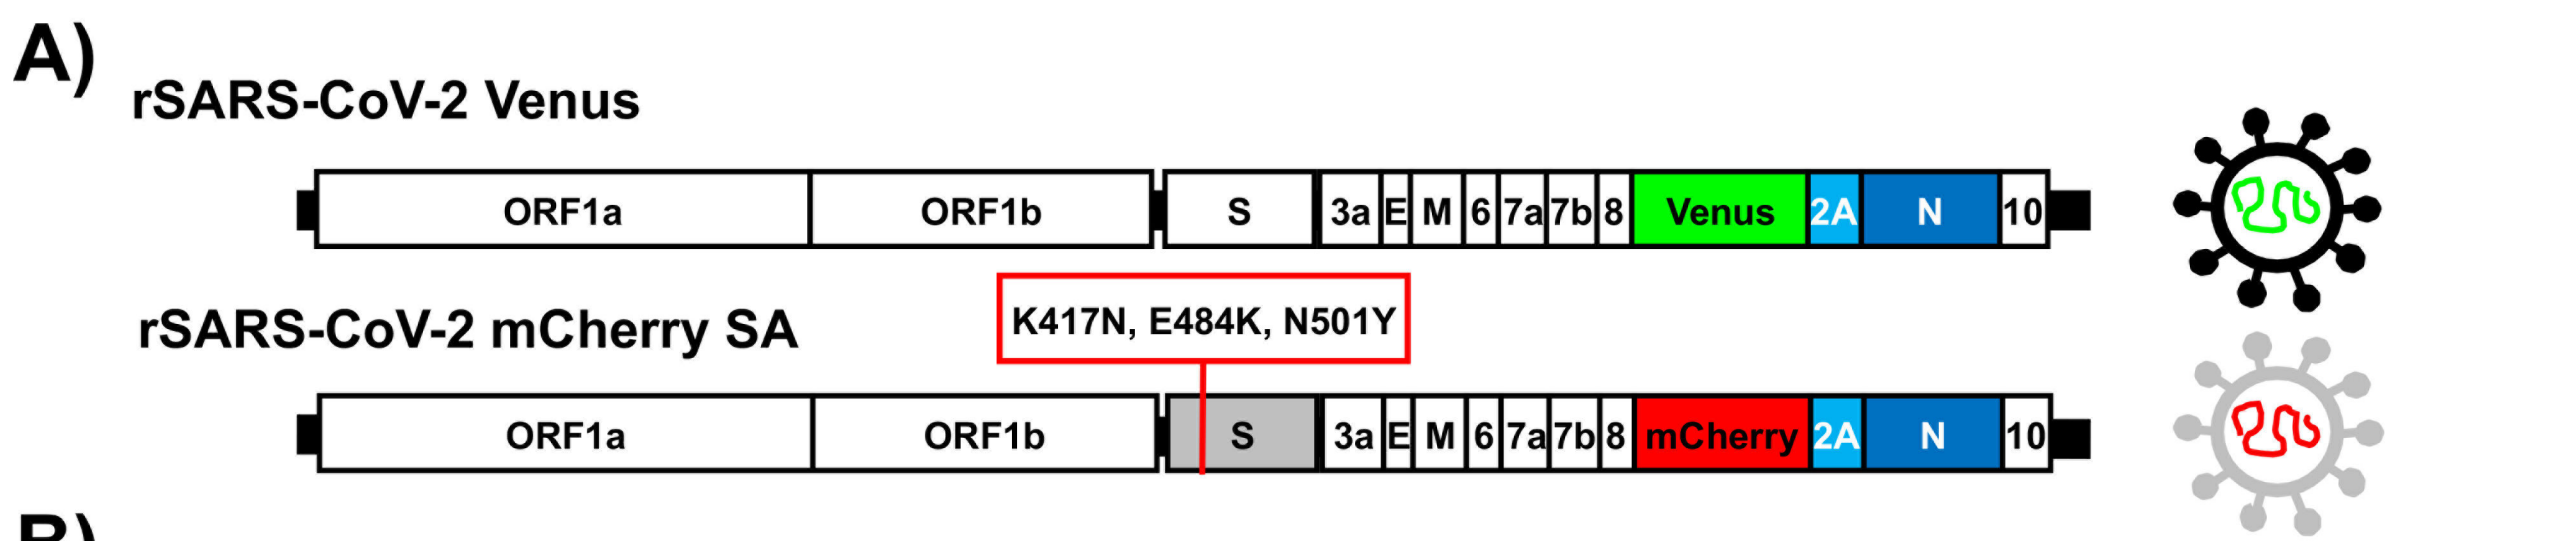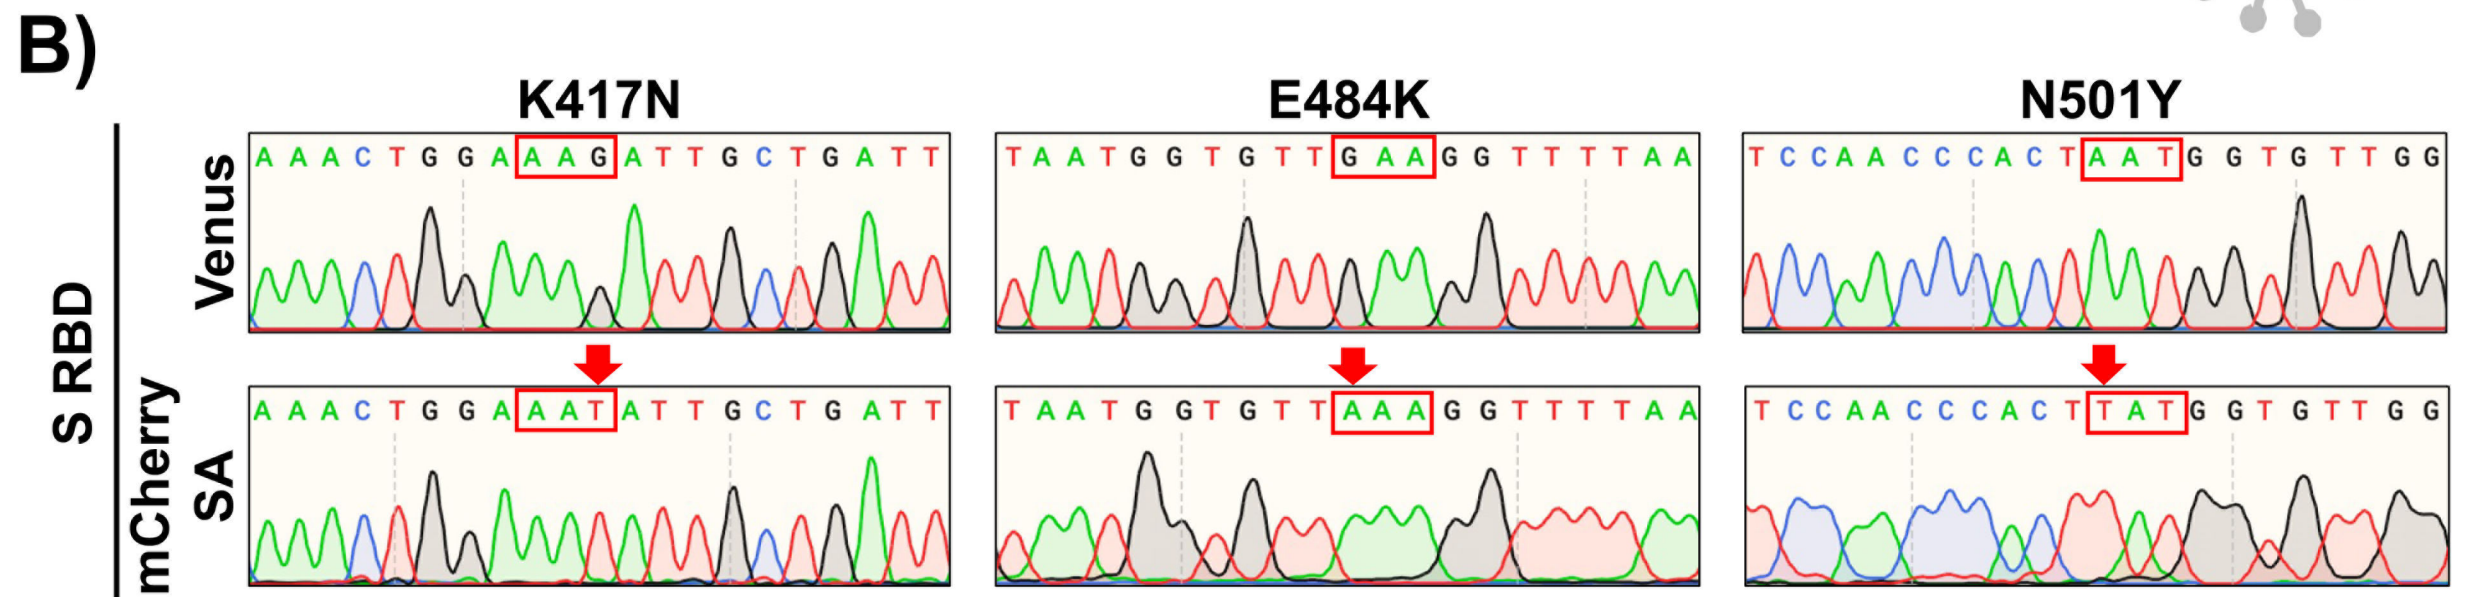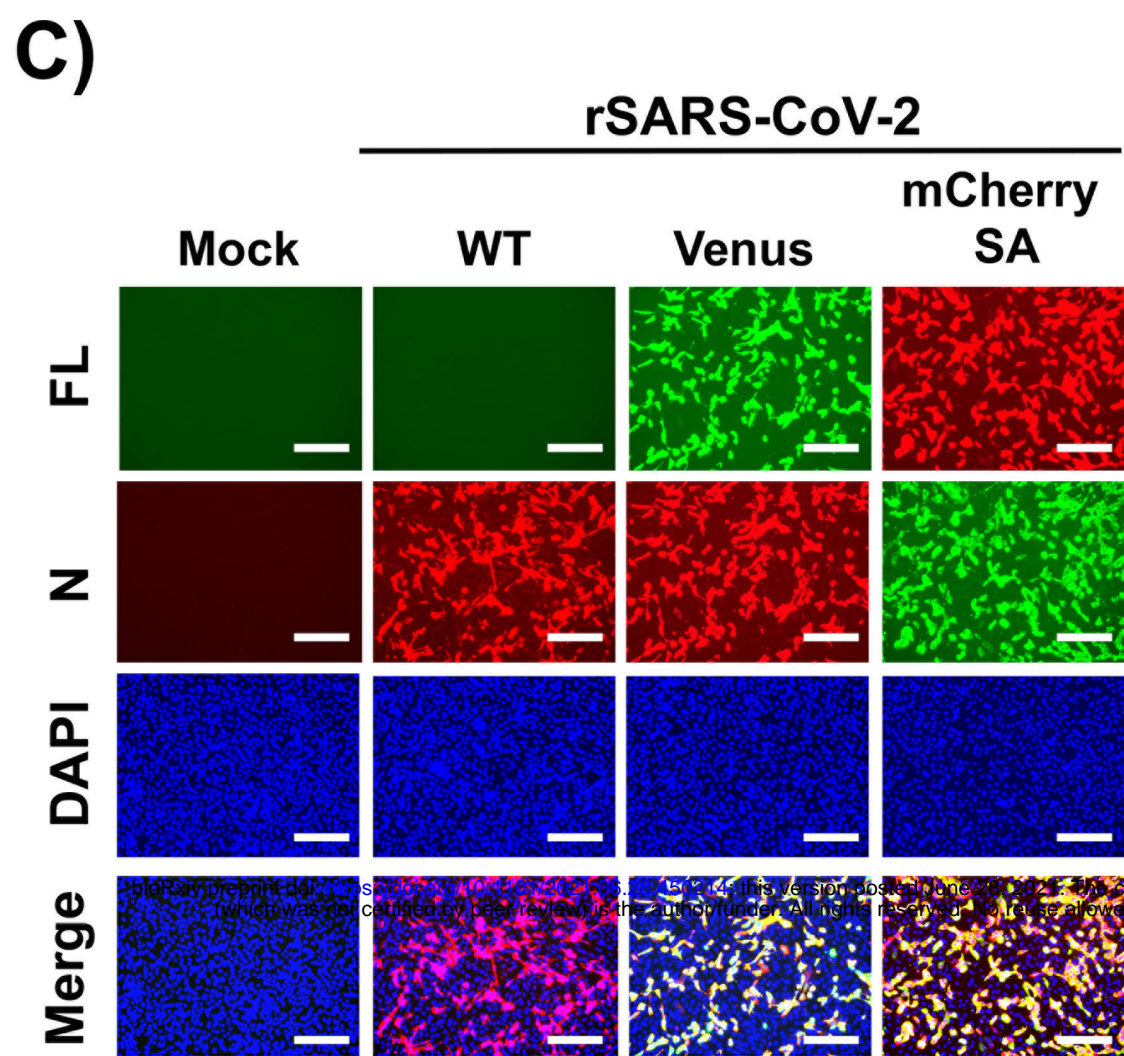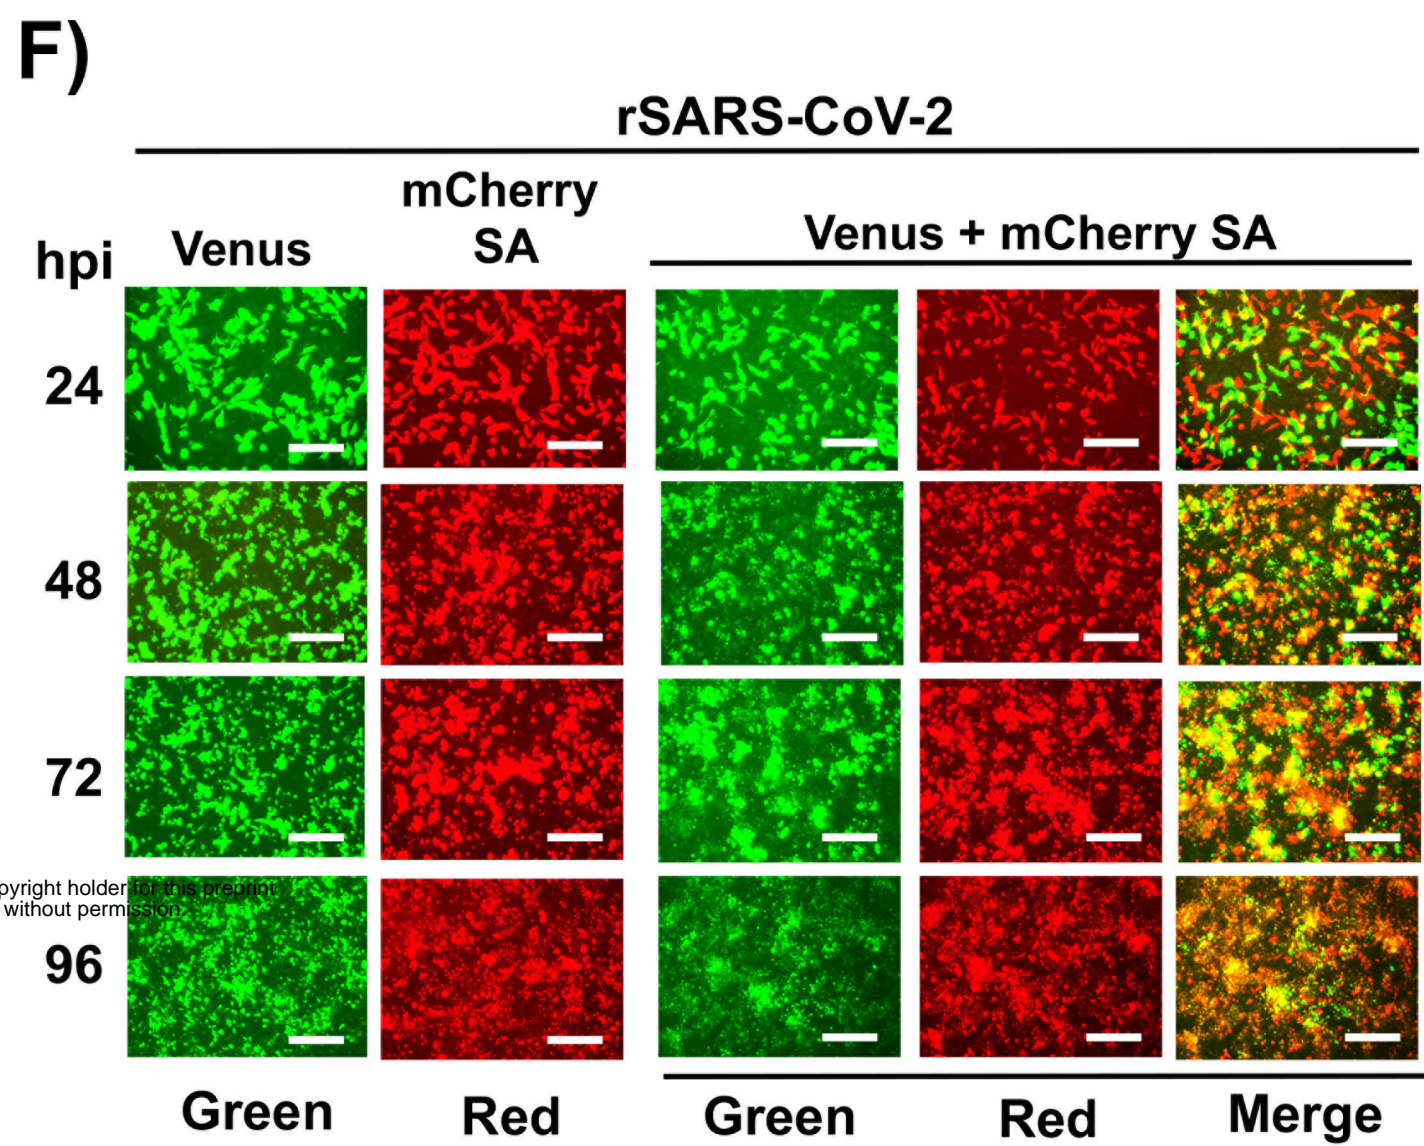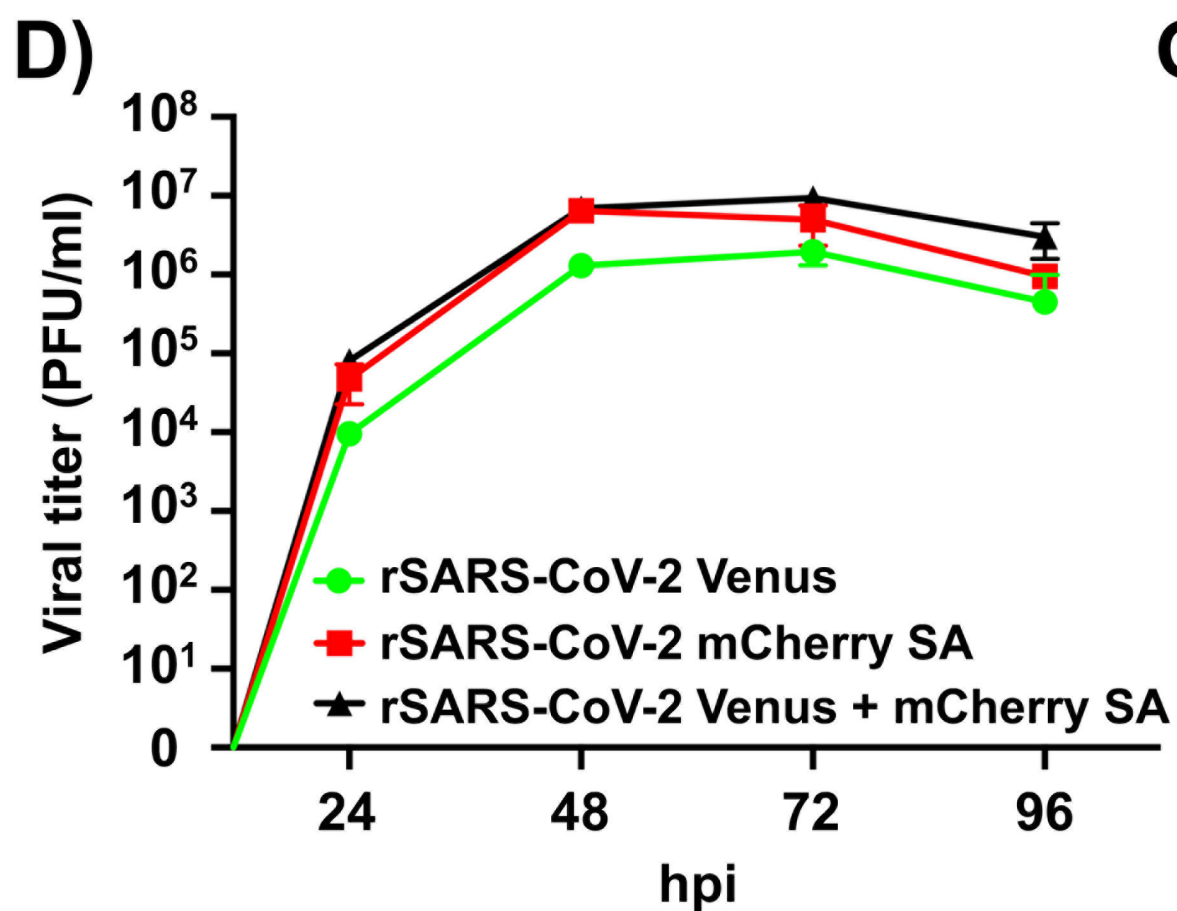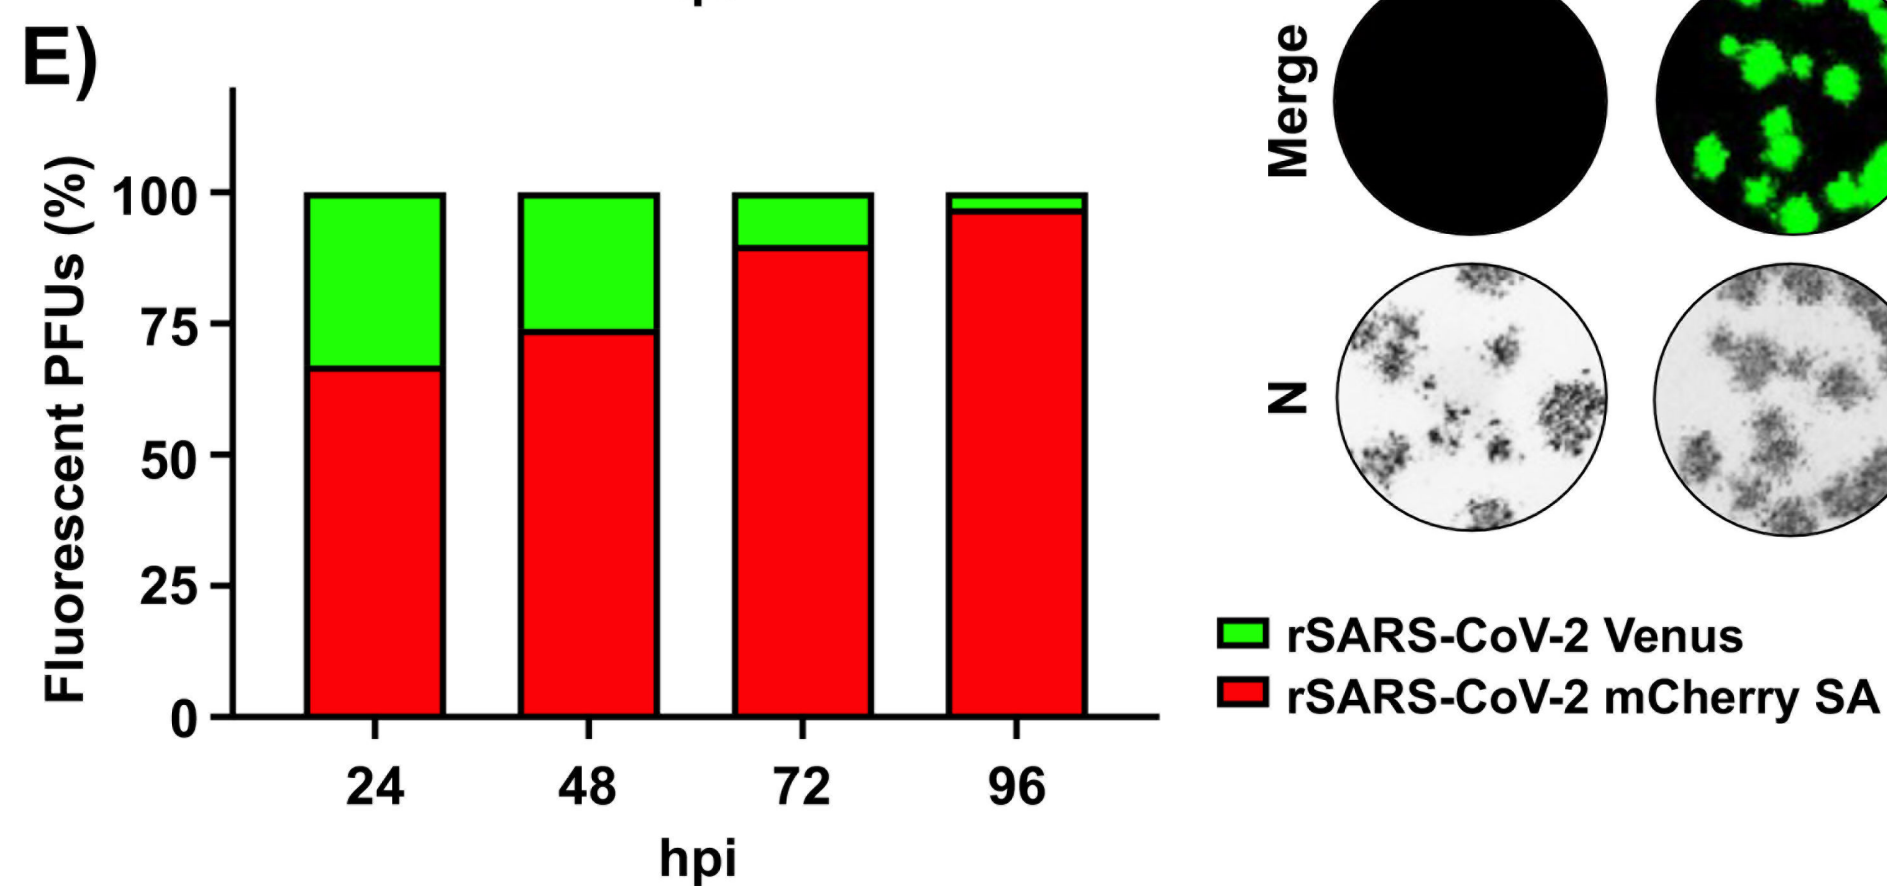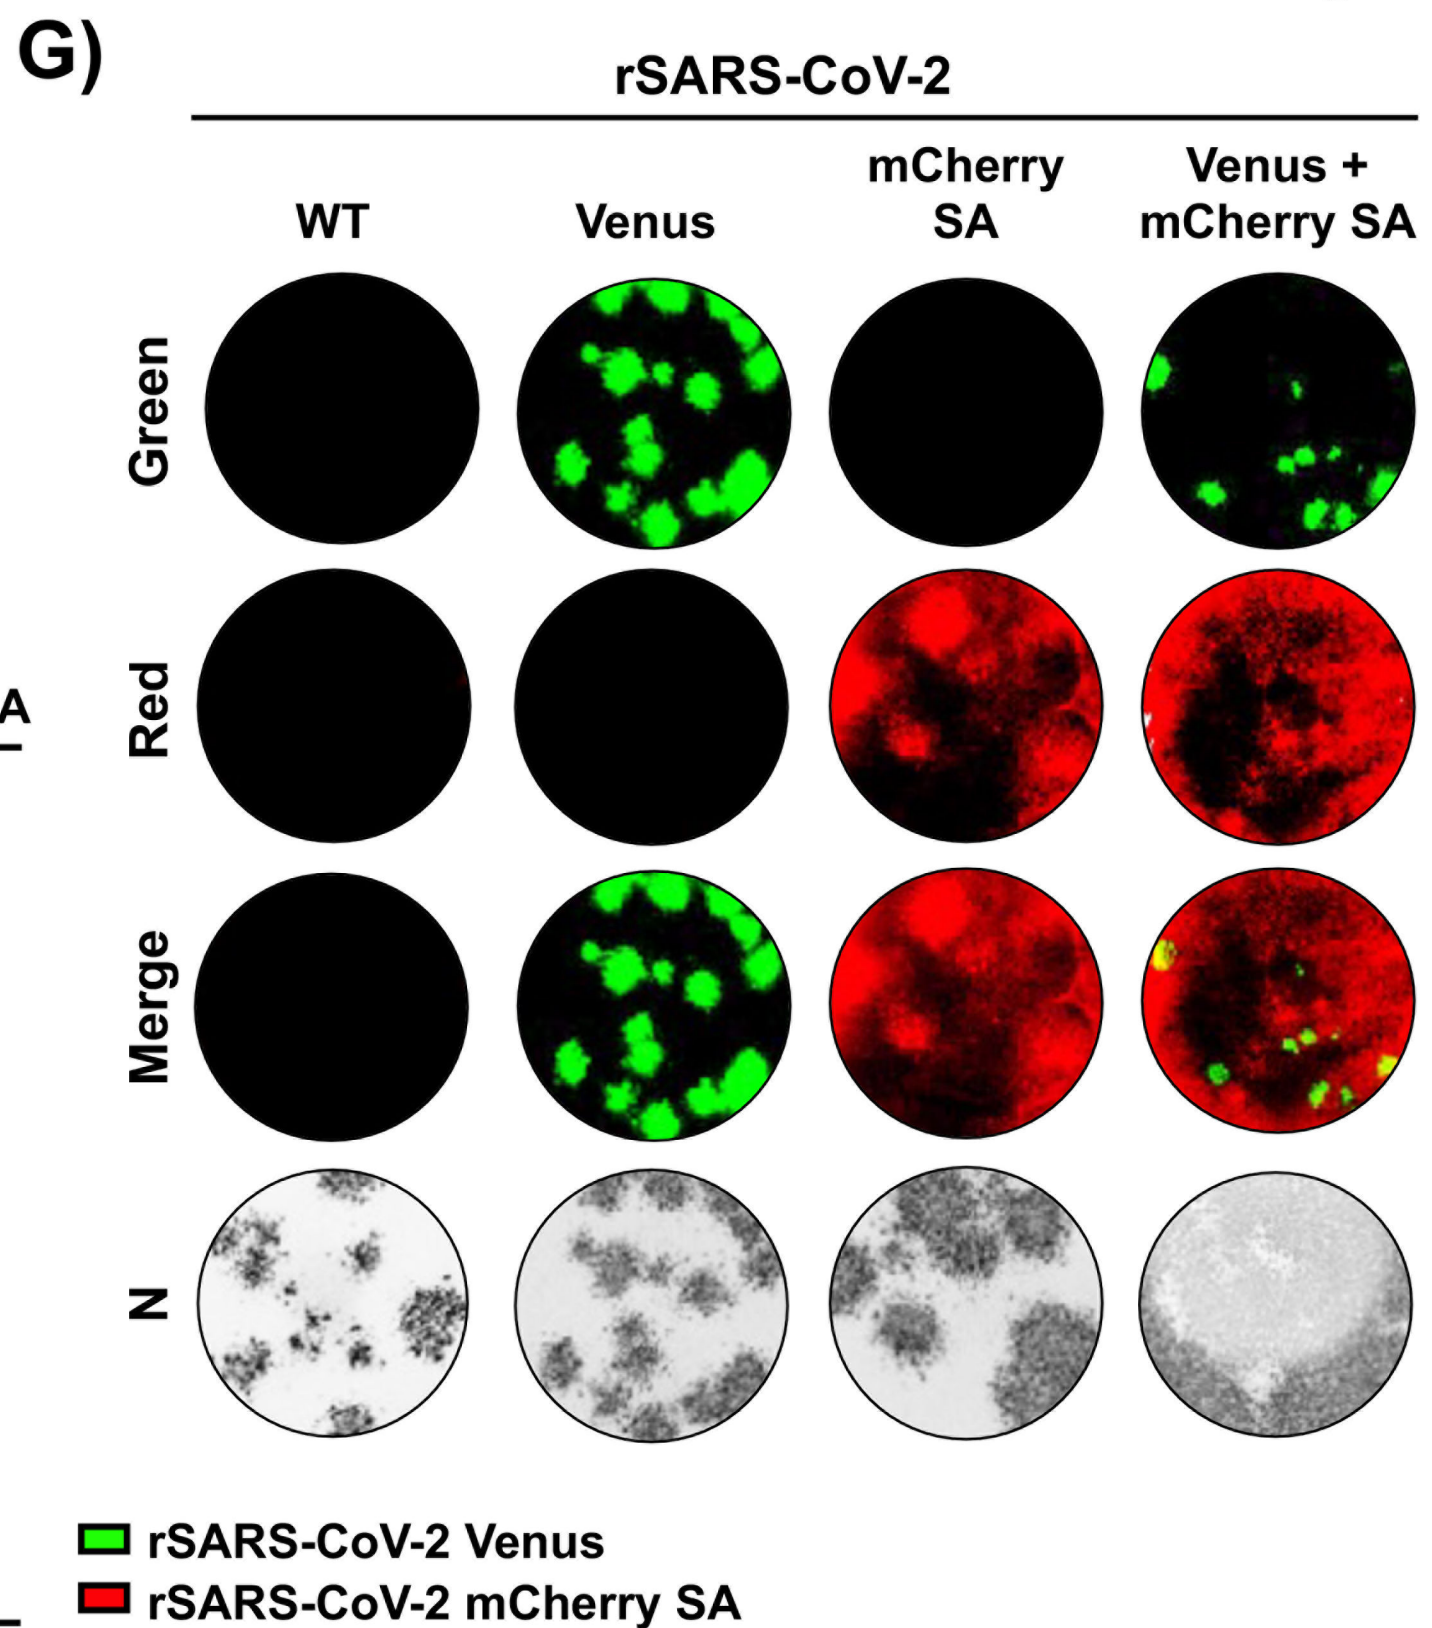



A)

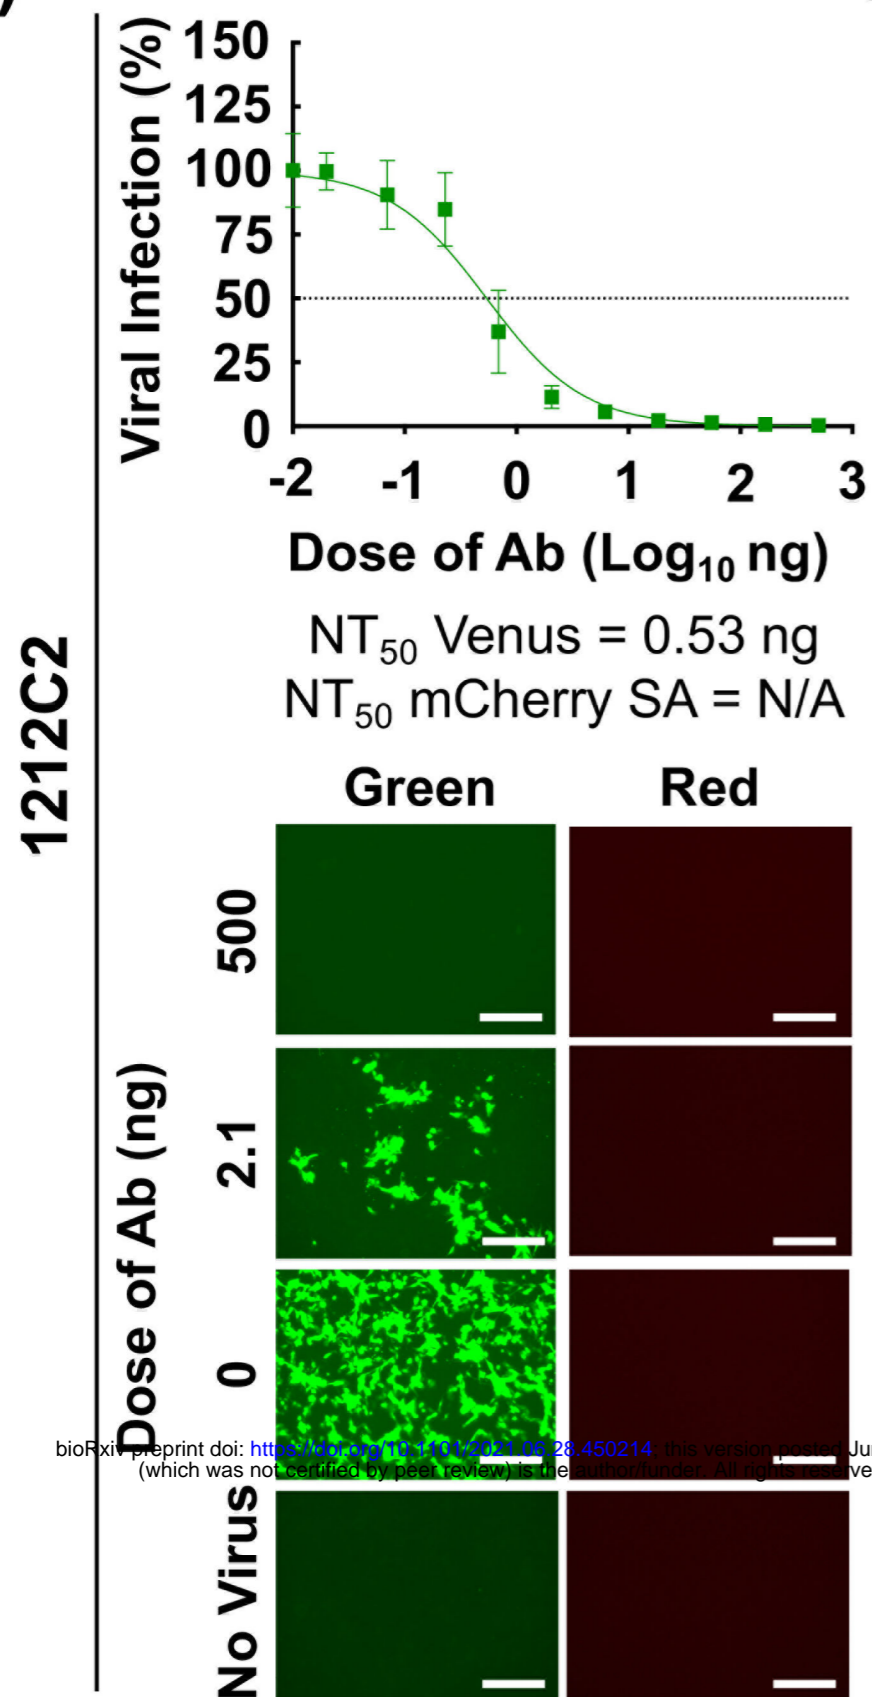

B)

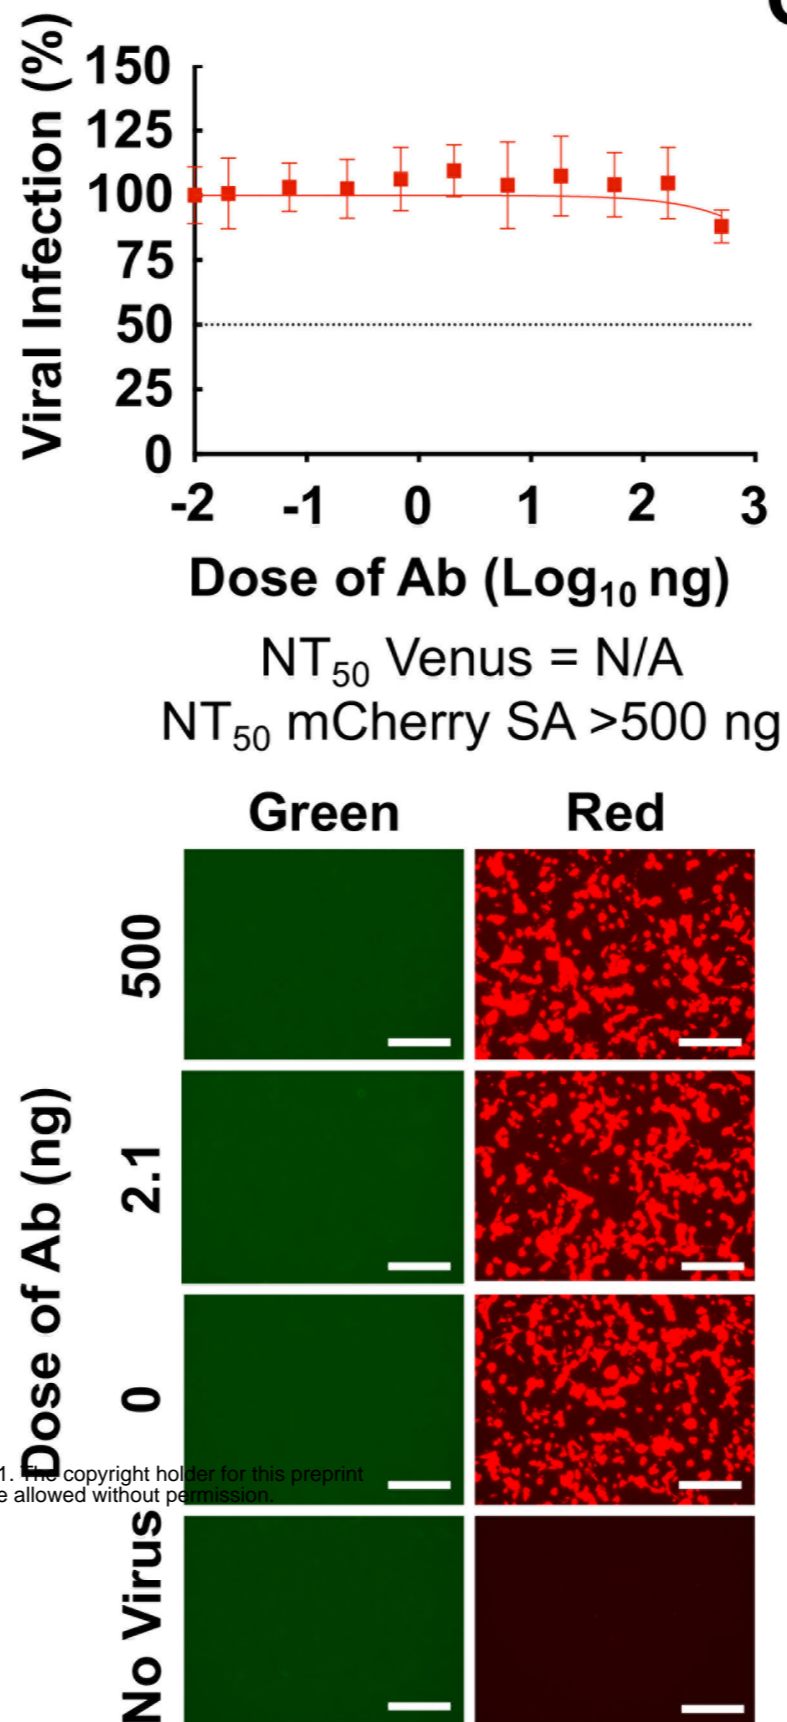

C)

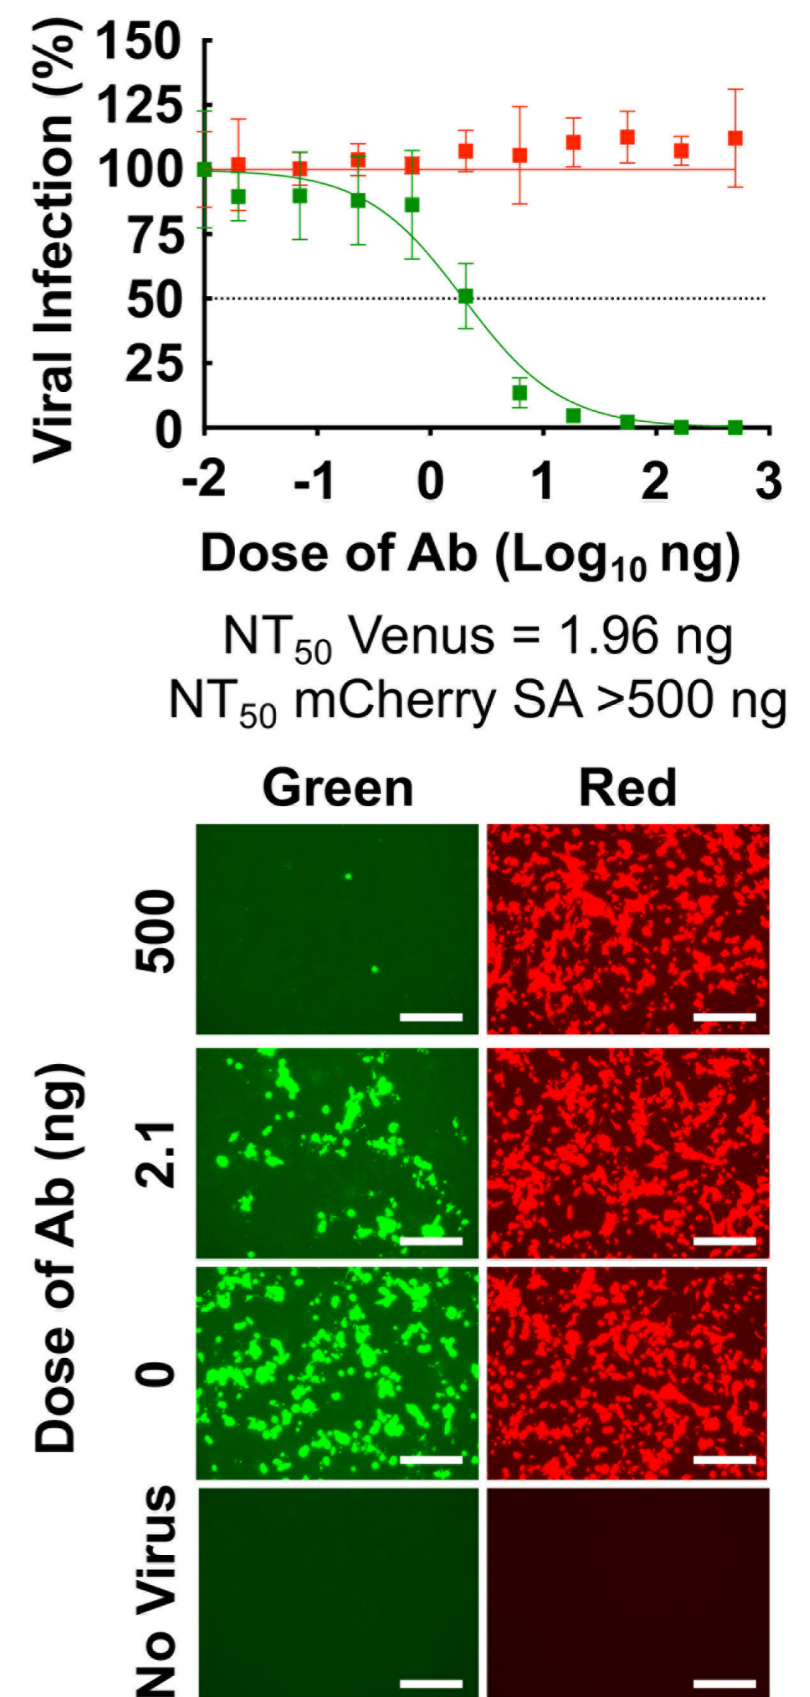

D)

1213H7

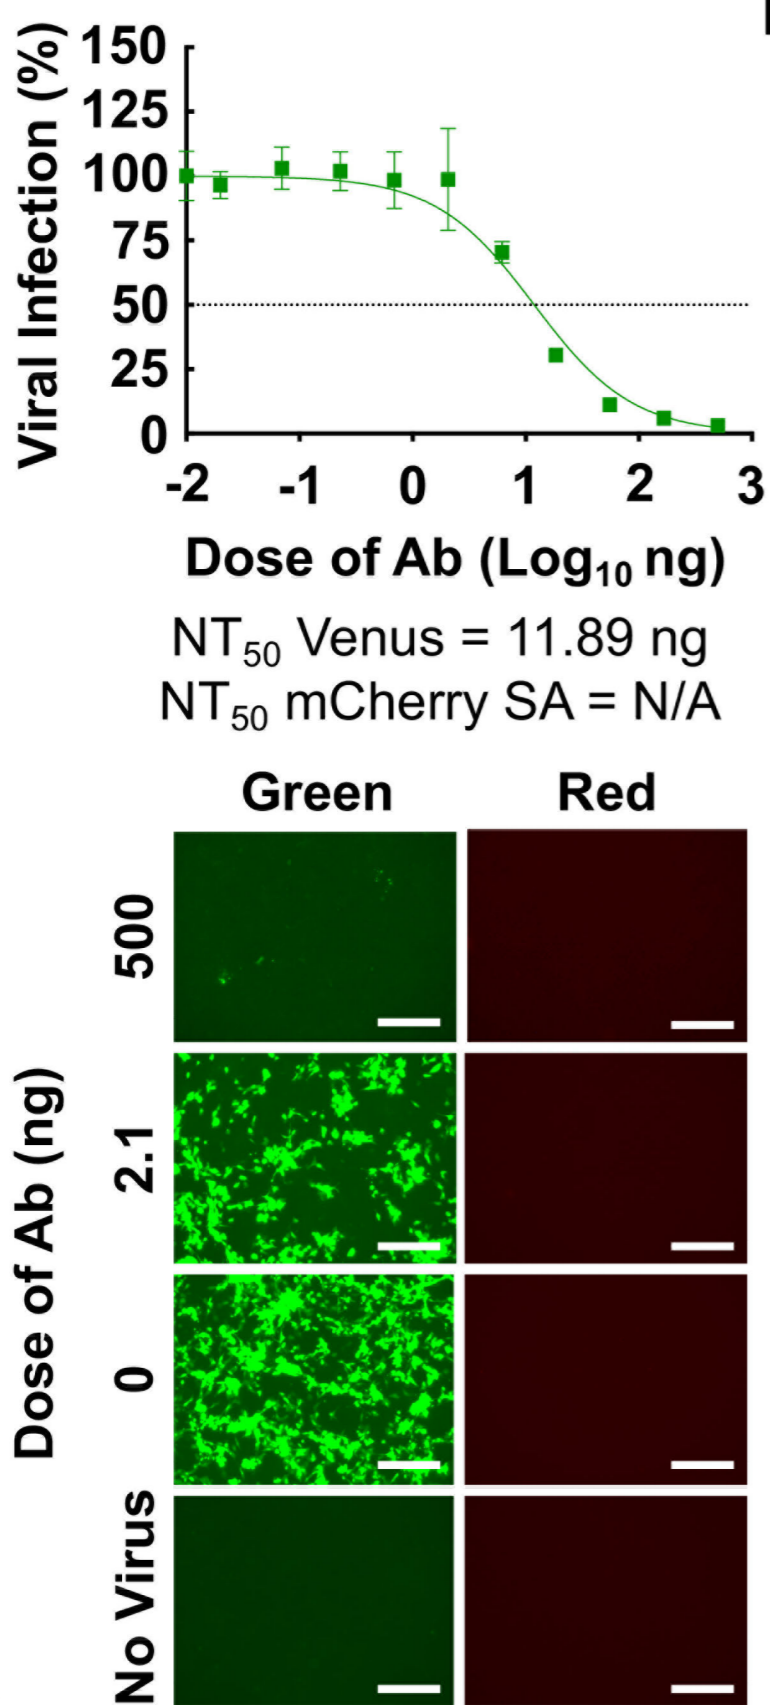

E)

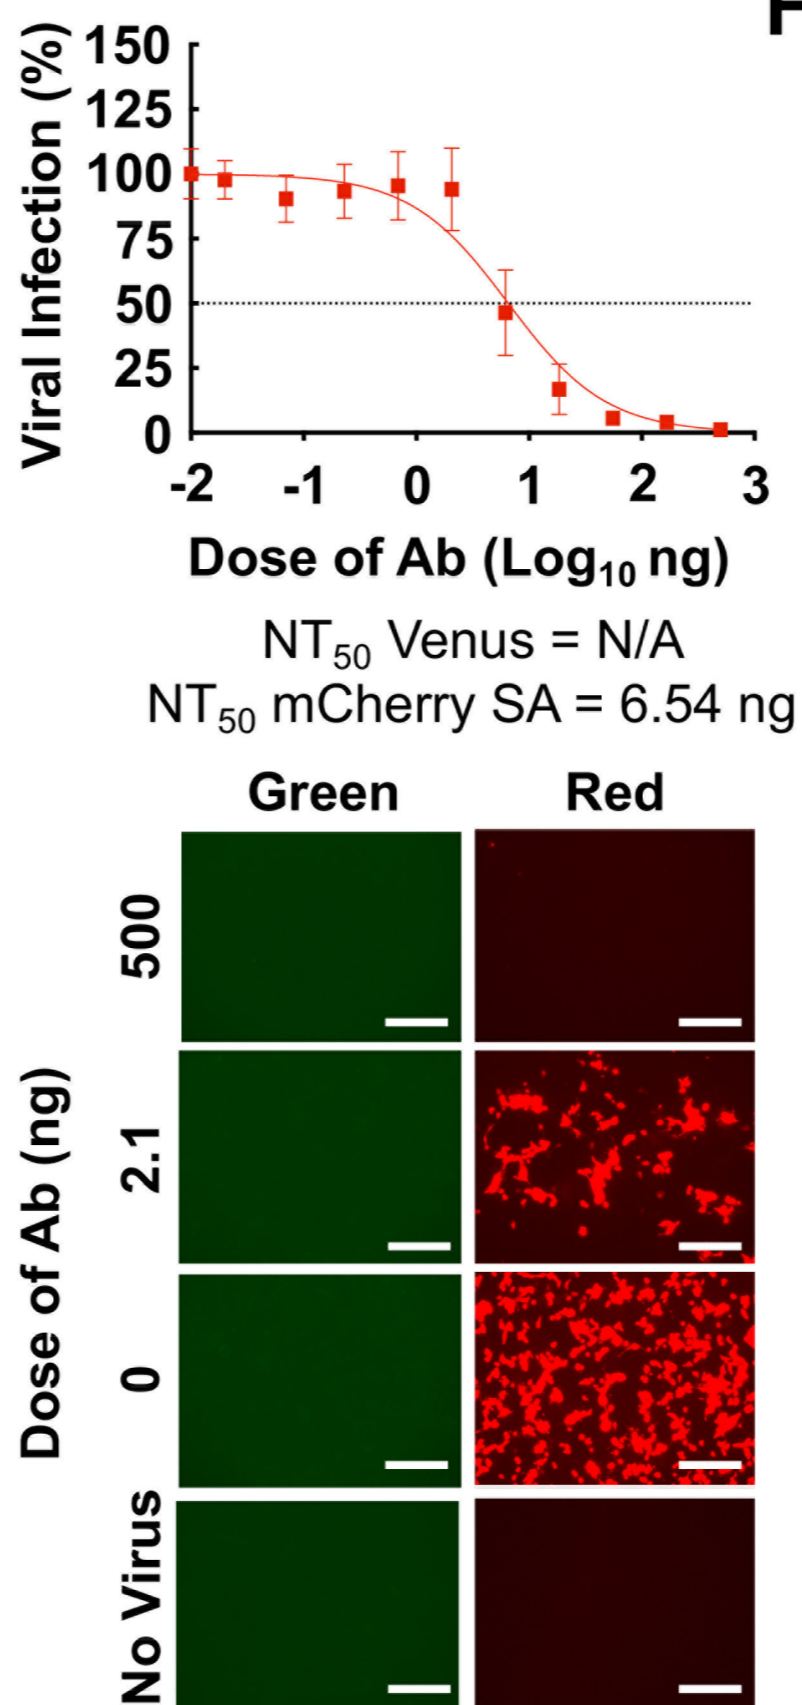

F)

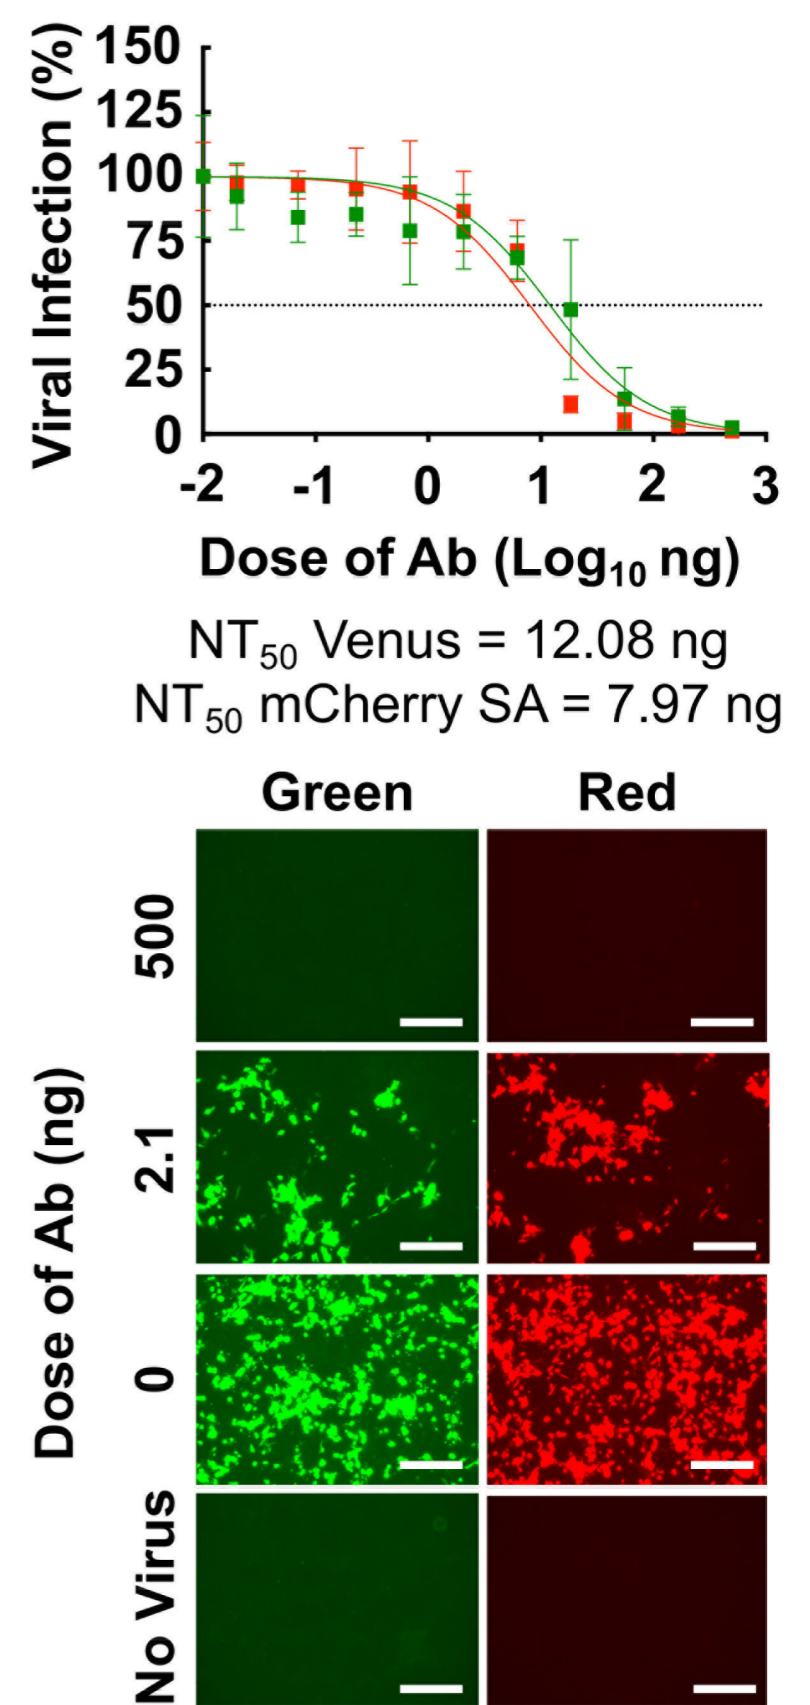

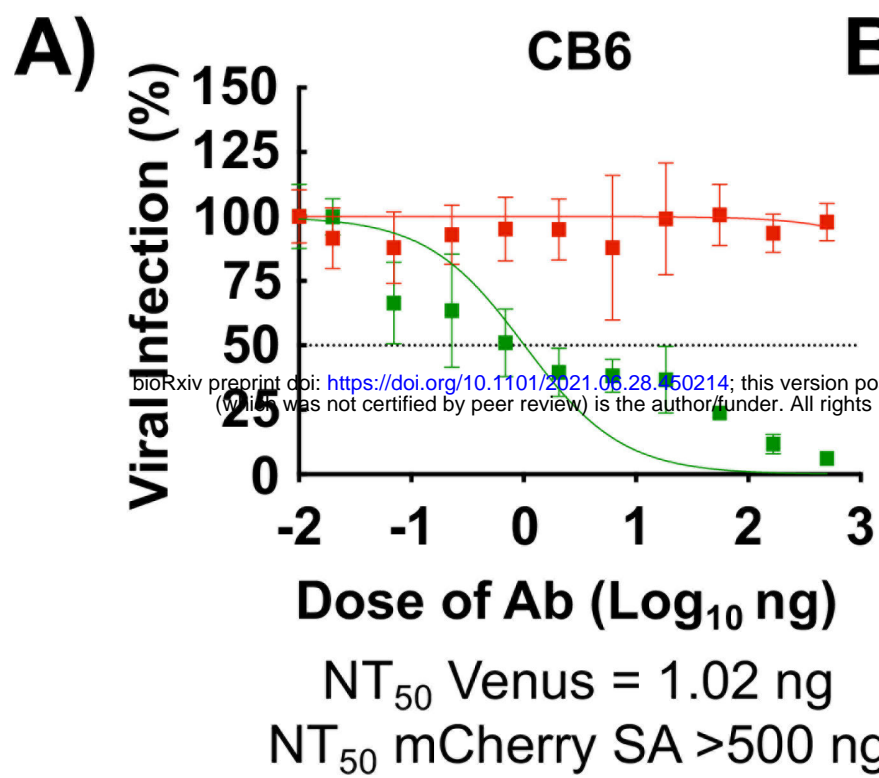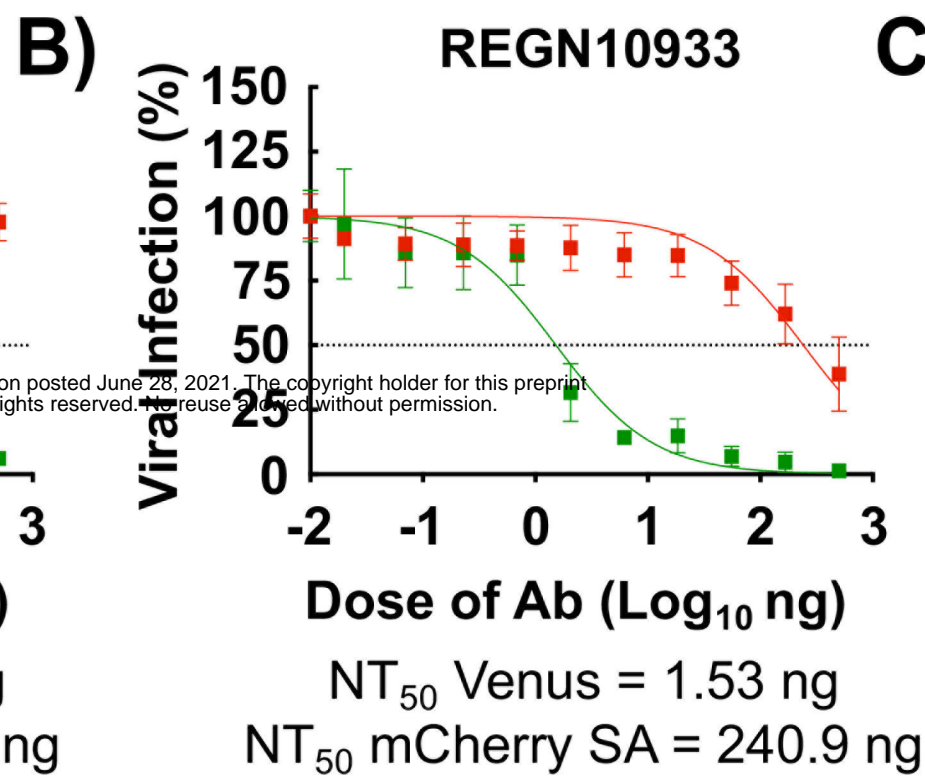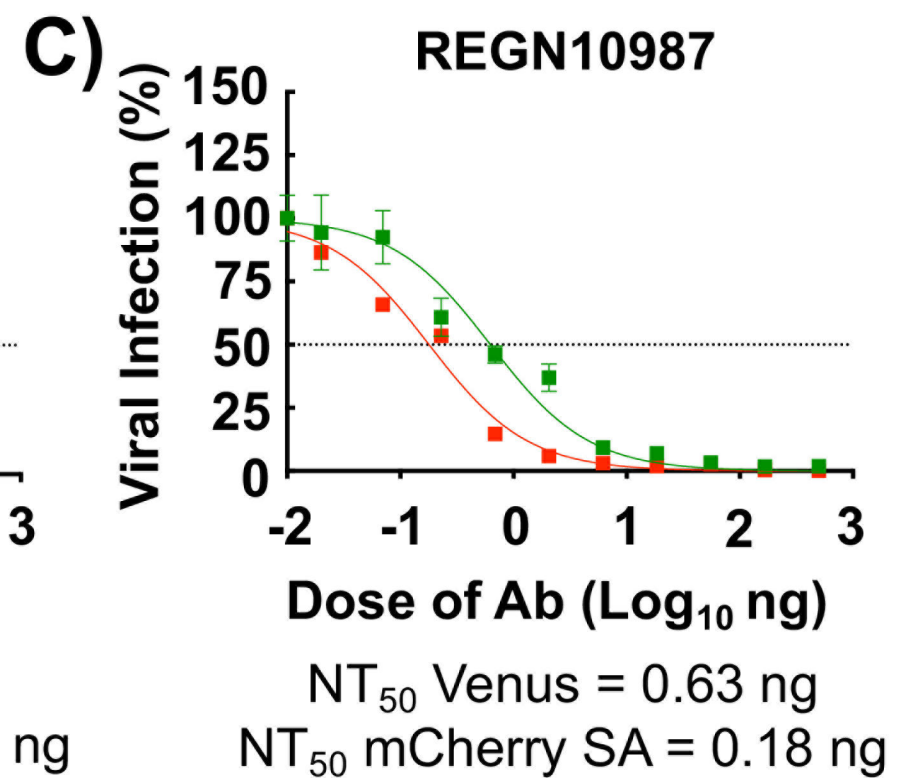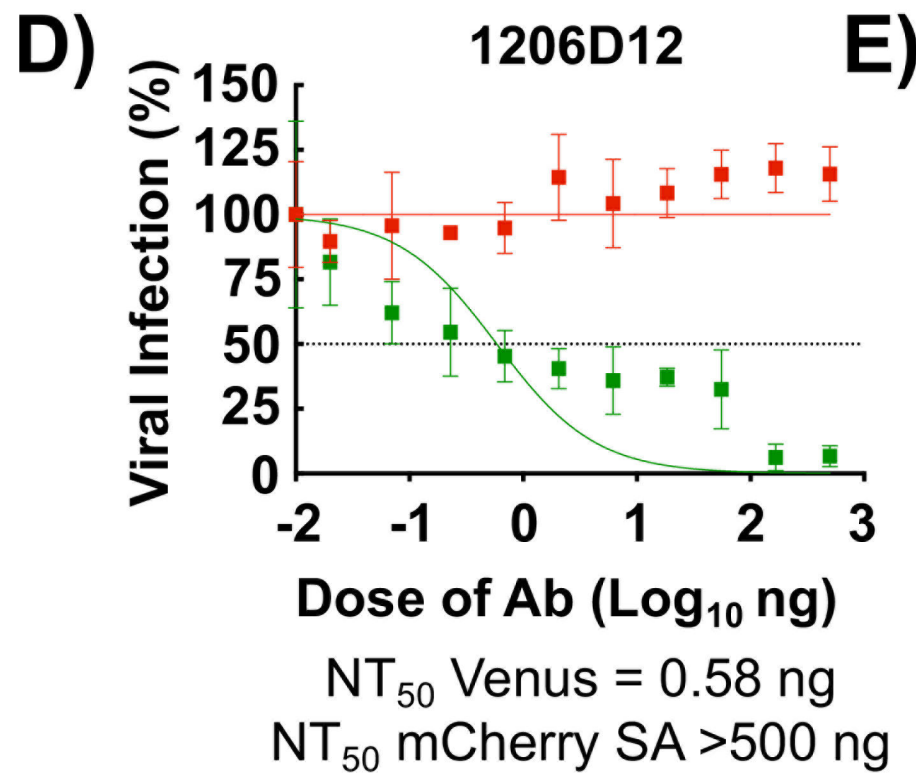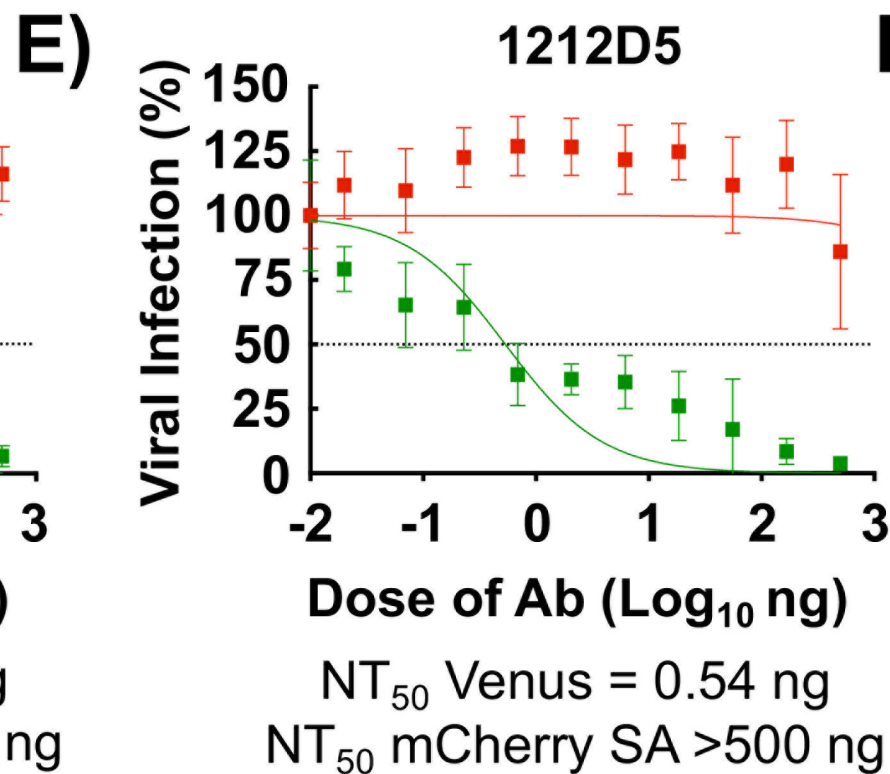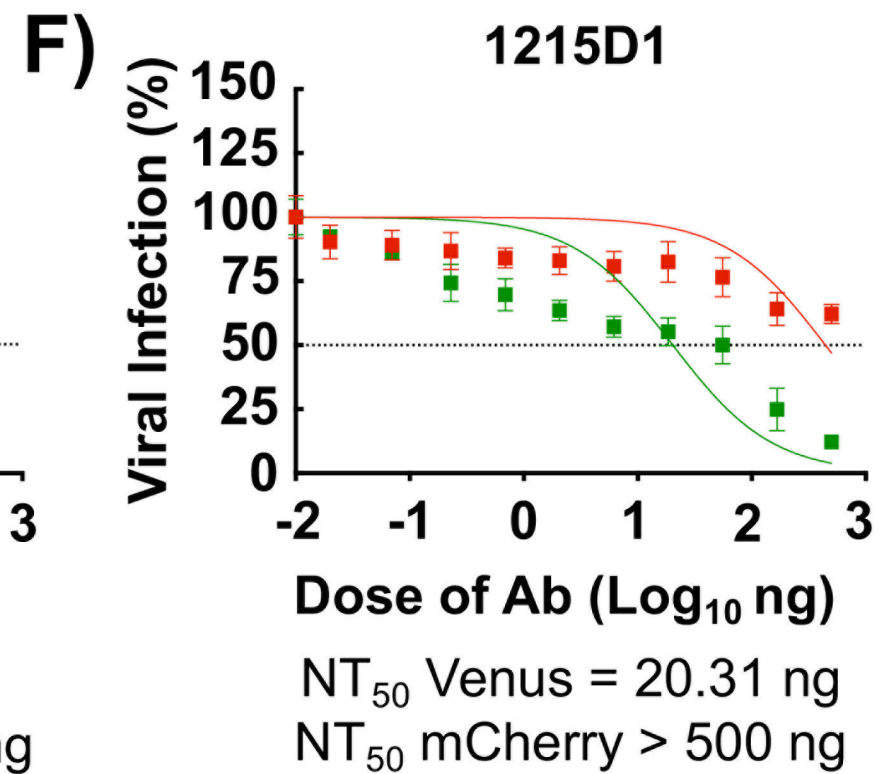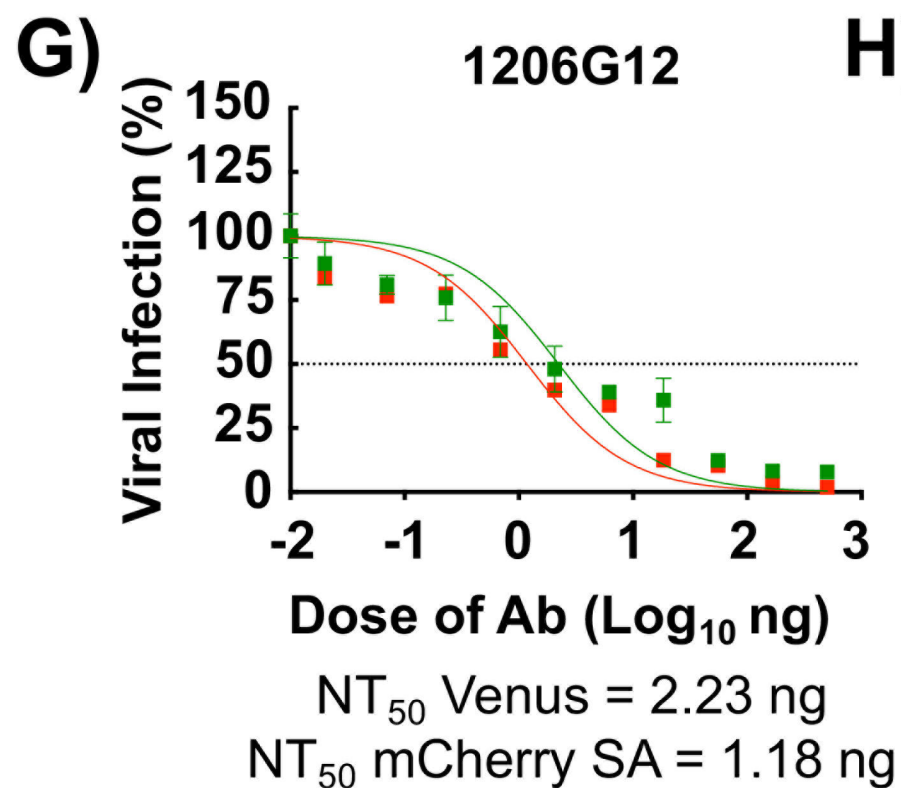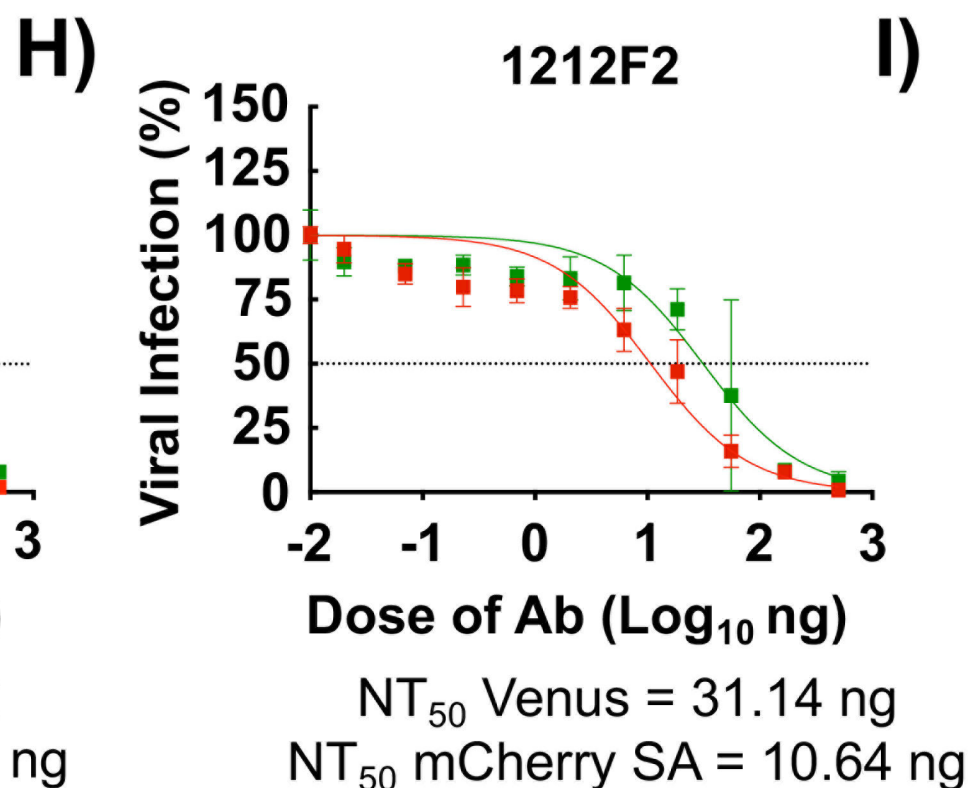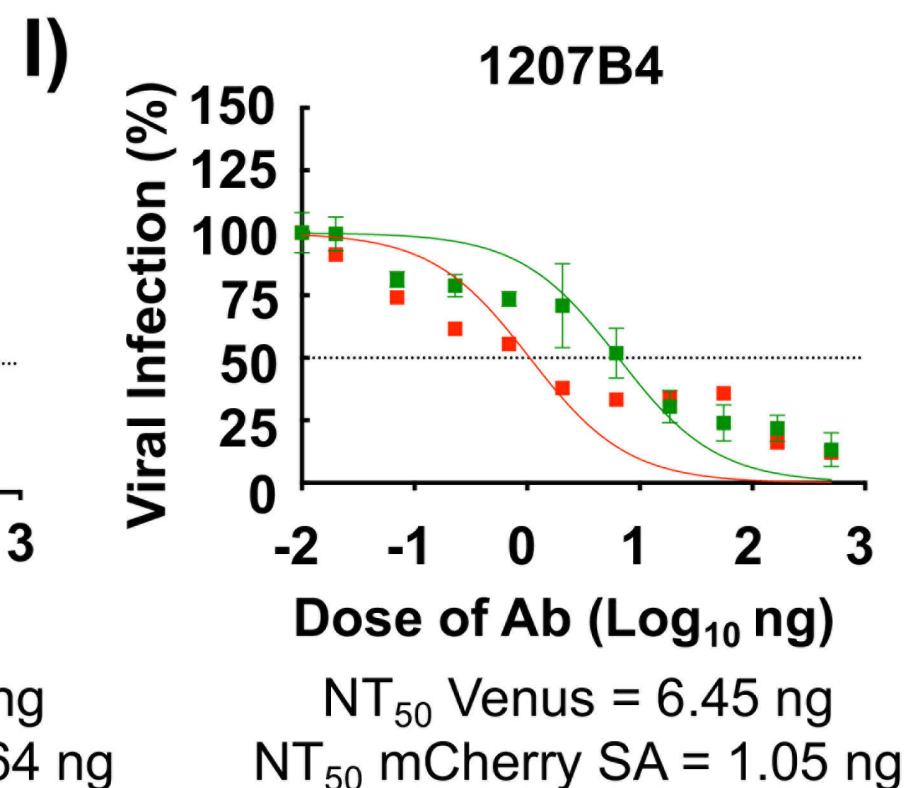

**A)**

rSARS-CoV-2 Venus

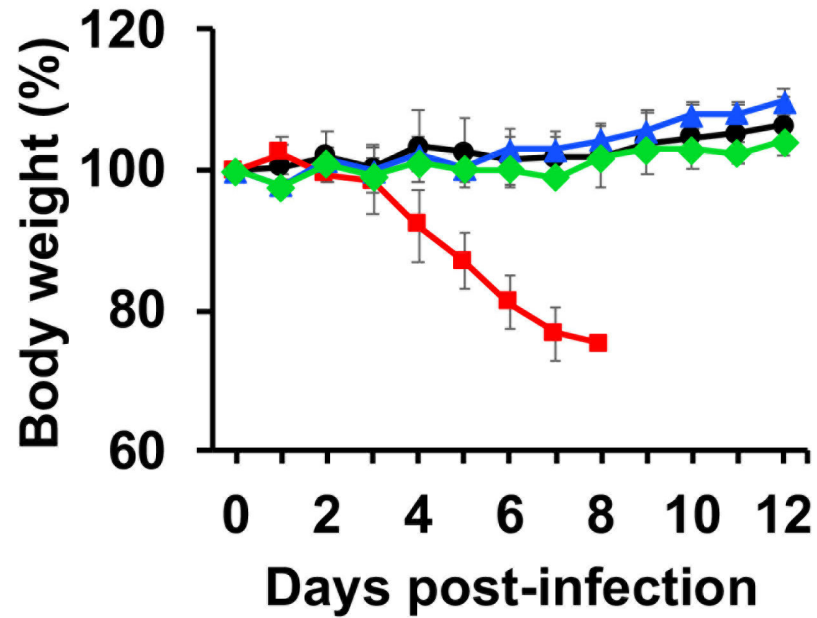

rSARS-CoV-2 mCherry SA

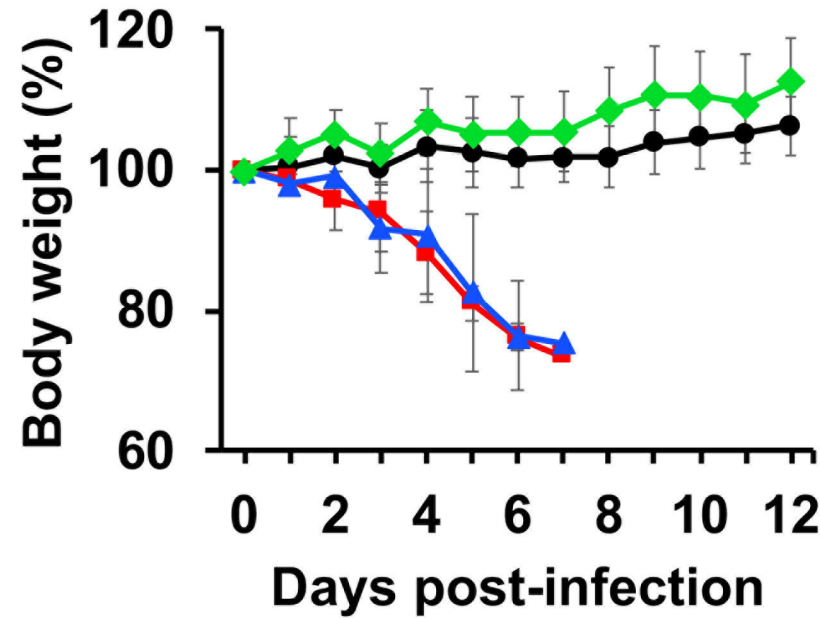rSARS-CoV-2 Venus +  
rSARS-CoV-2 mCherry SA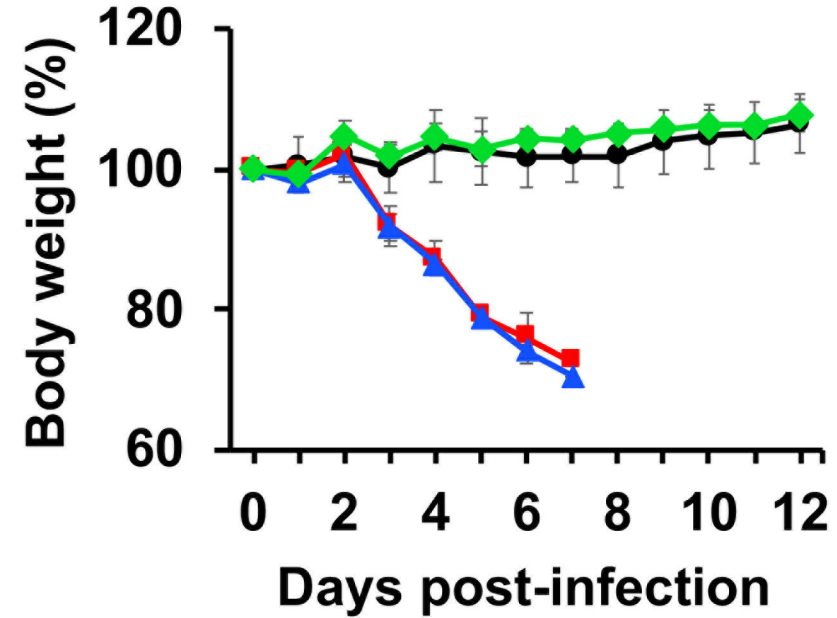

● Mock  
 ■ Isotype  
 ▲ 1212C2  
 ◆ 1213H7

**B)**

rSARS-CoV-2 Venus

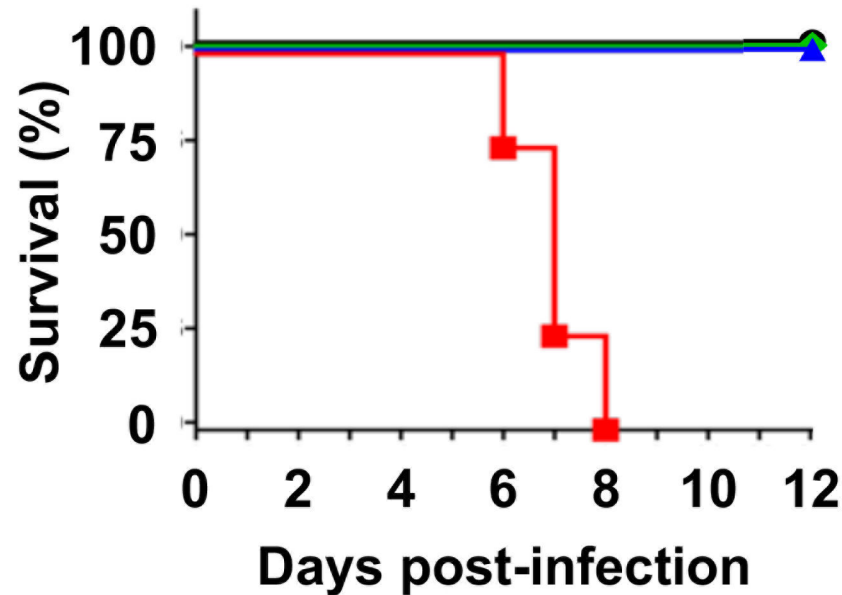

rSARS-CoV-2 mCherry SA

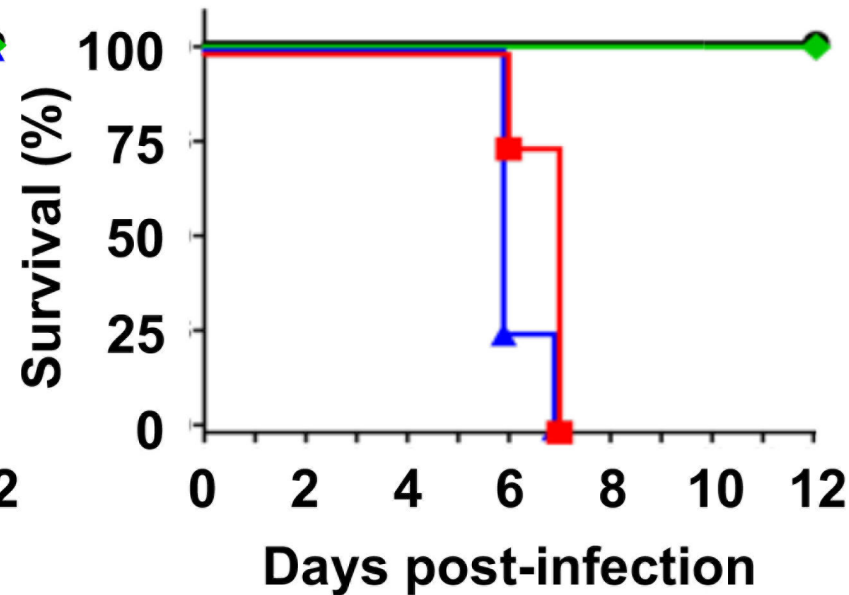rSARS-CoV-2 Venus +  
rSARS-CoV-2 mCherry SA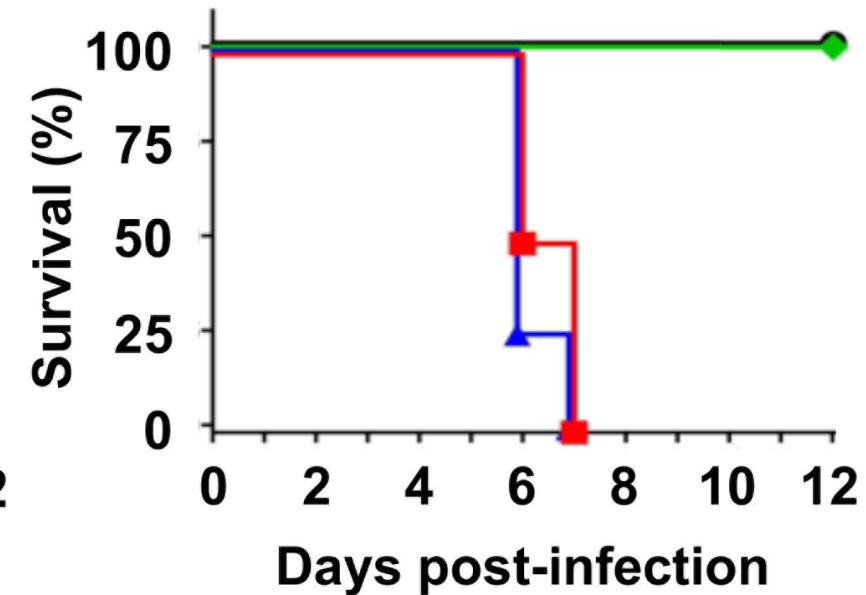

● Mock  
 ■ Isotype  
 ▲ 1212C2  
 ◆ 1213H7

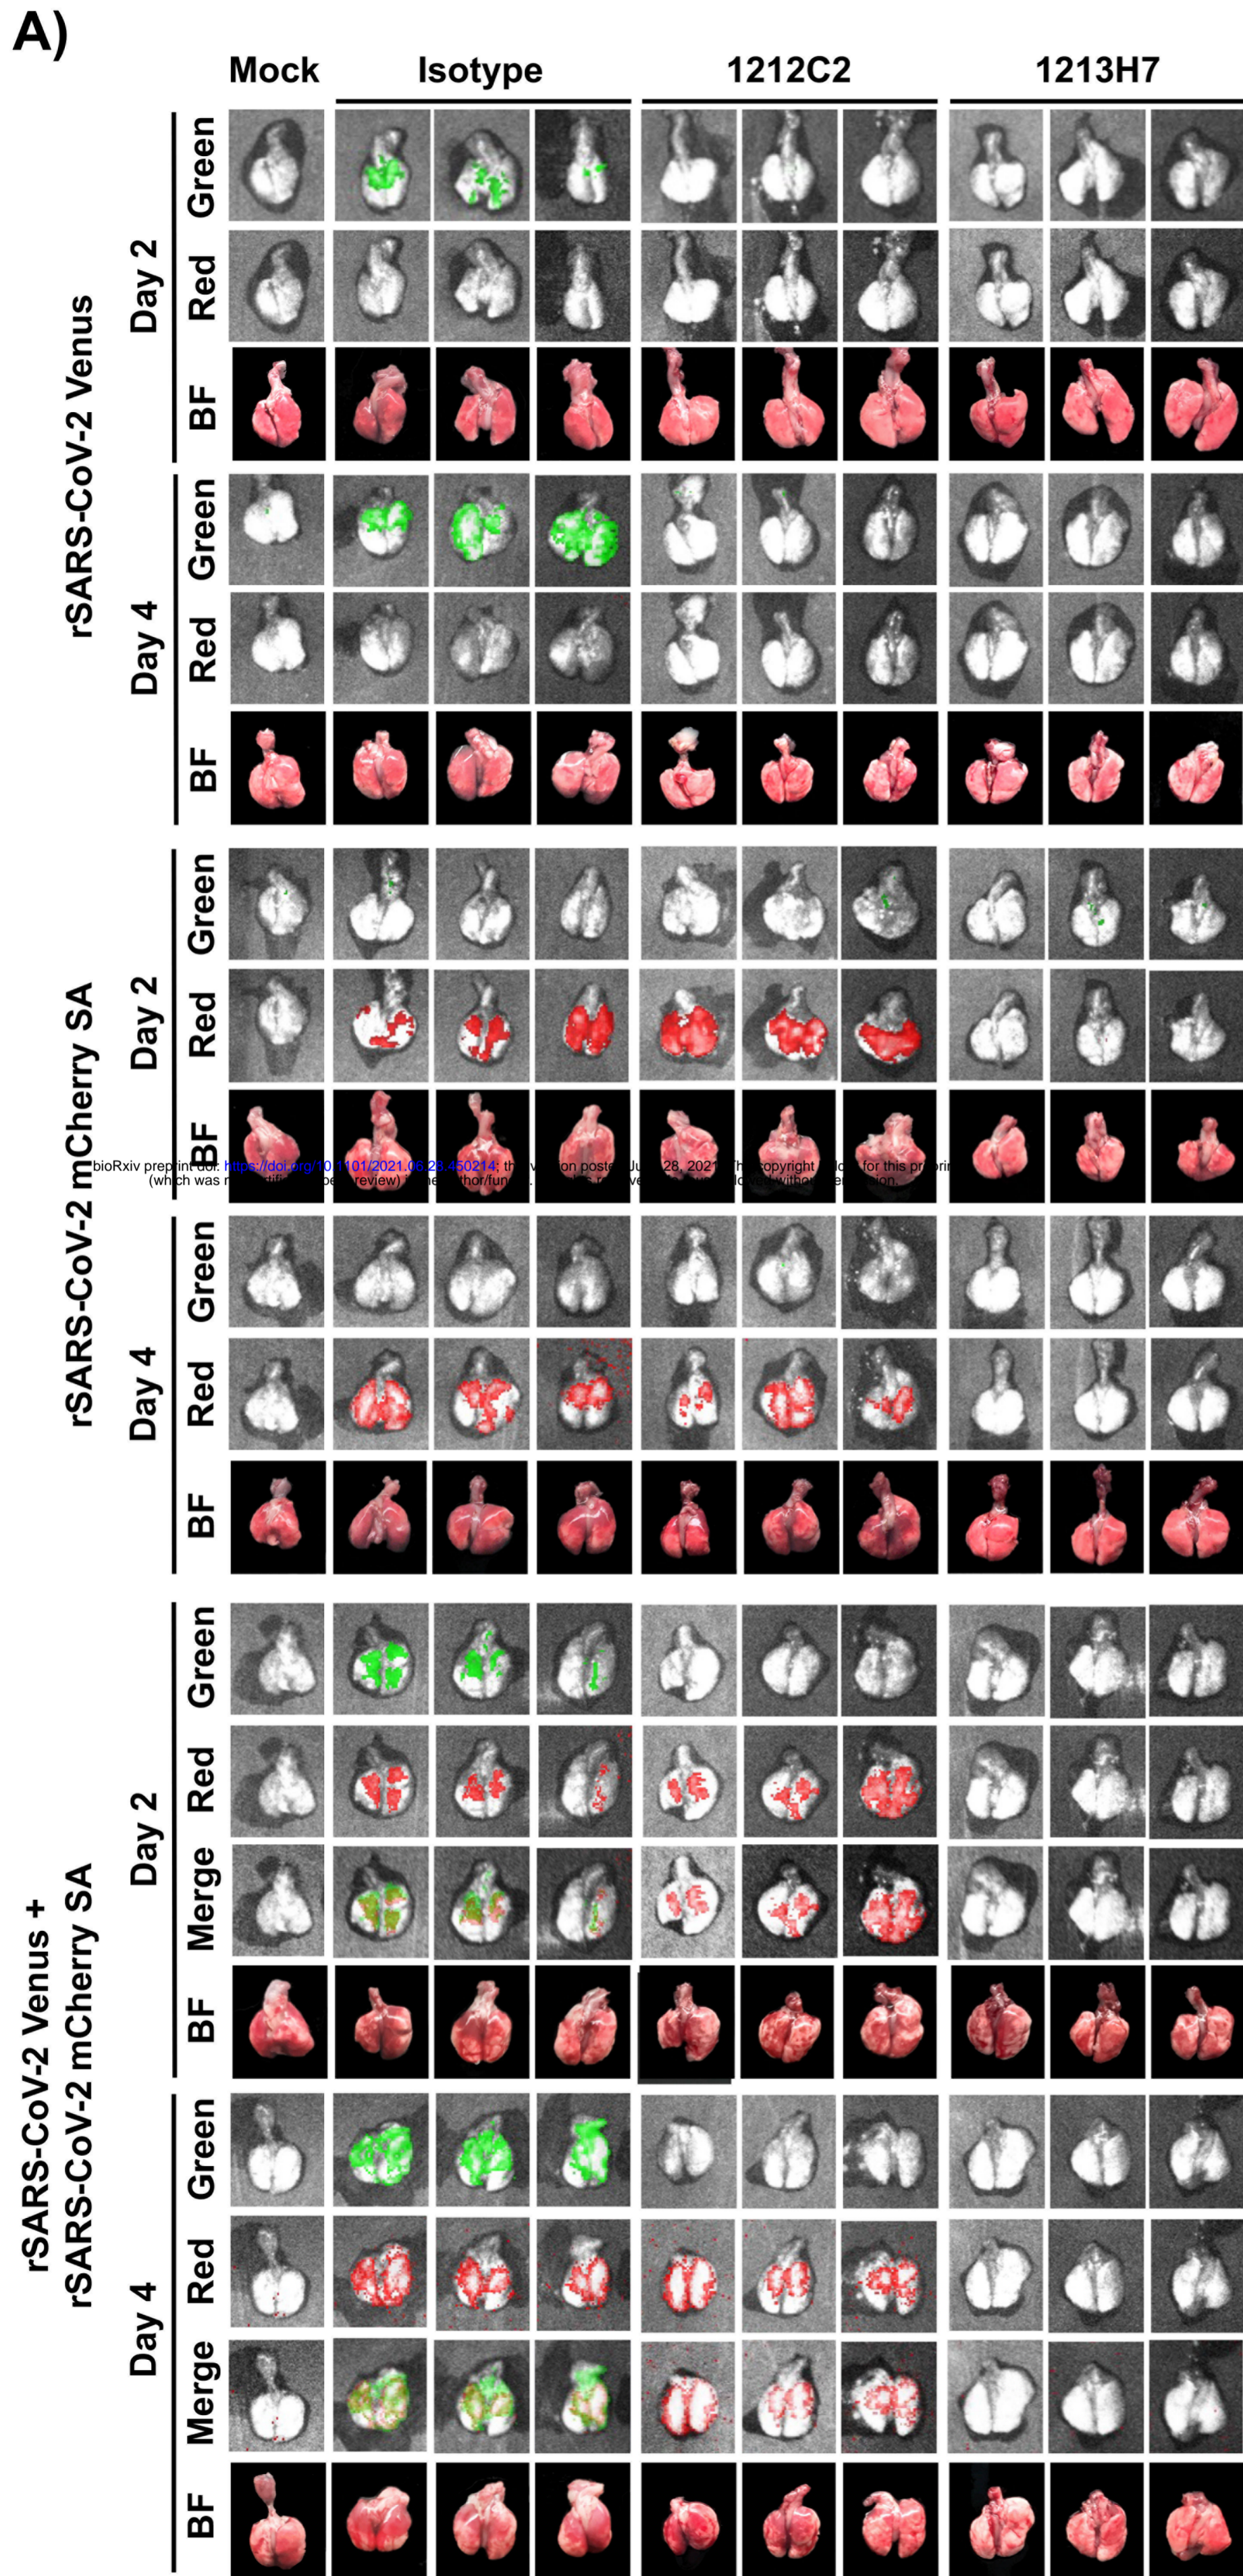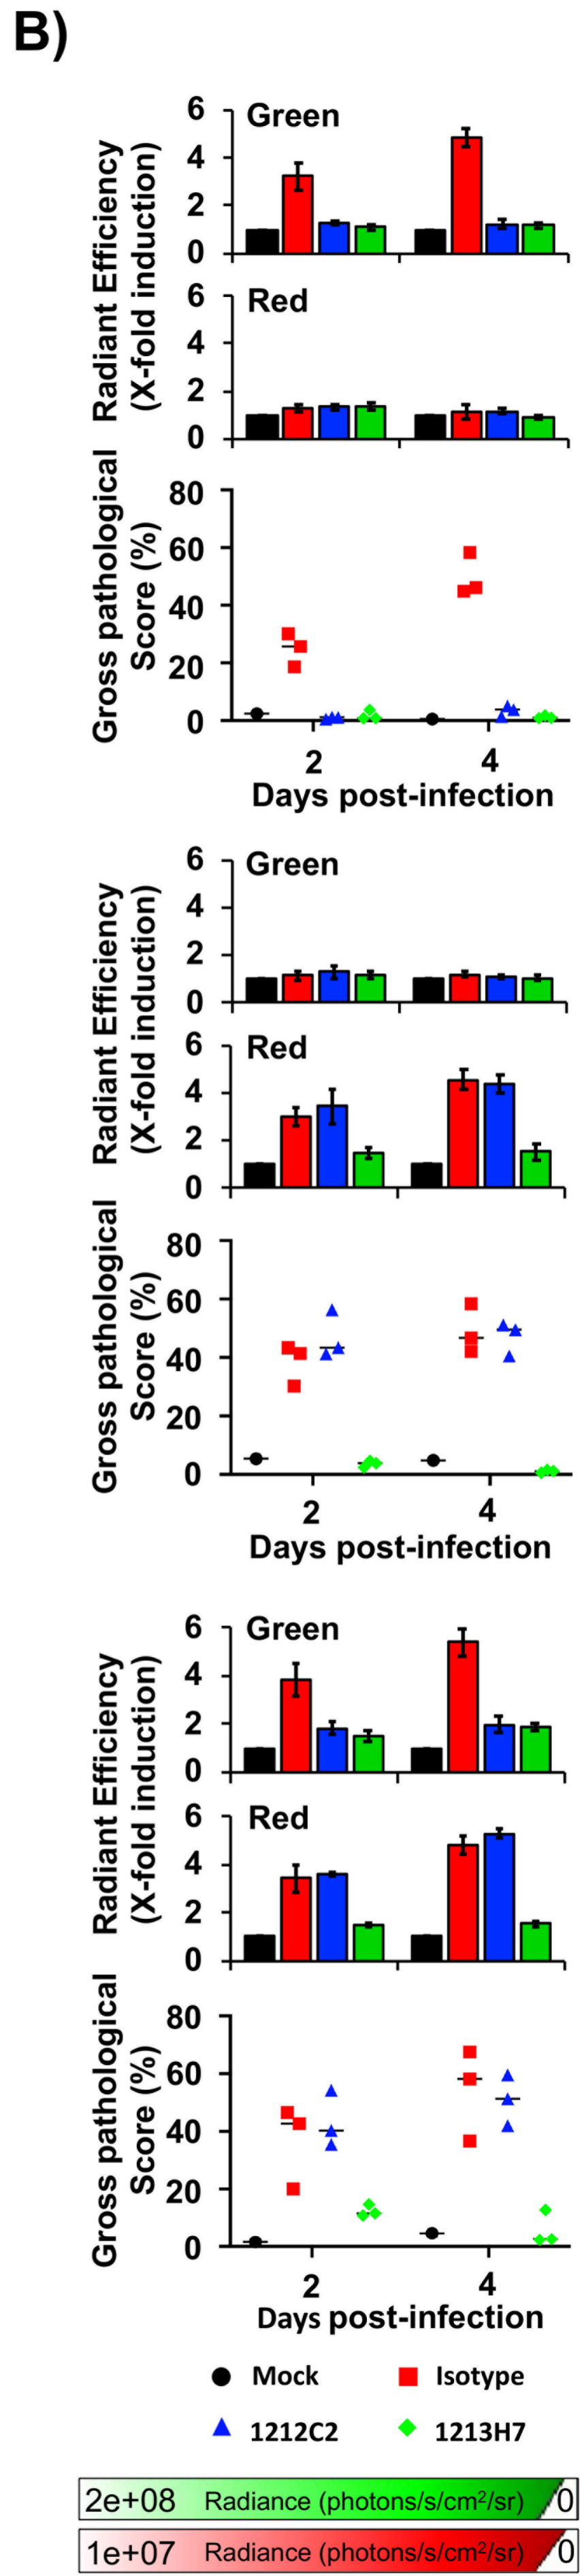

**A)**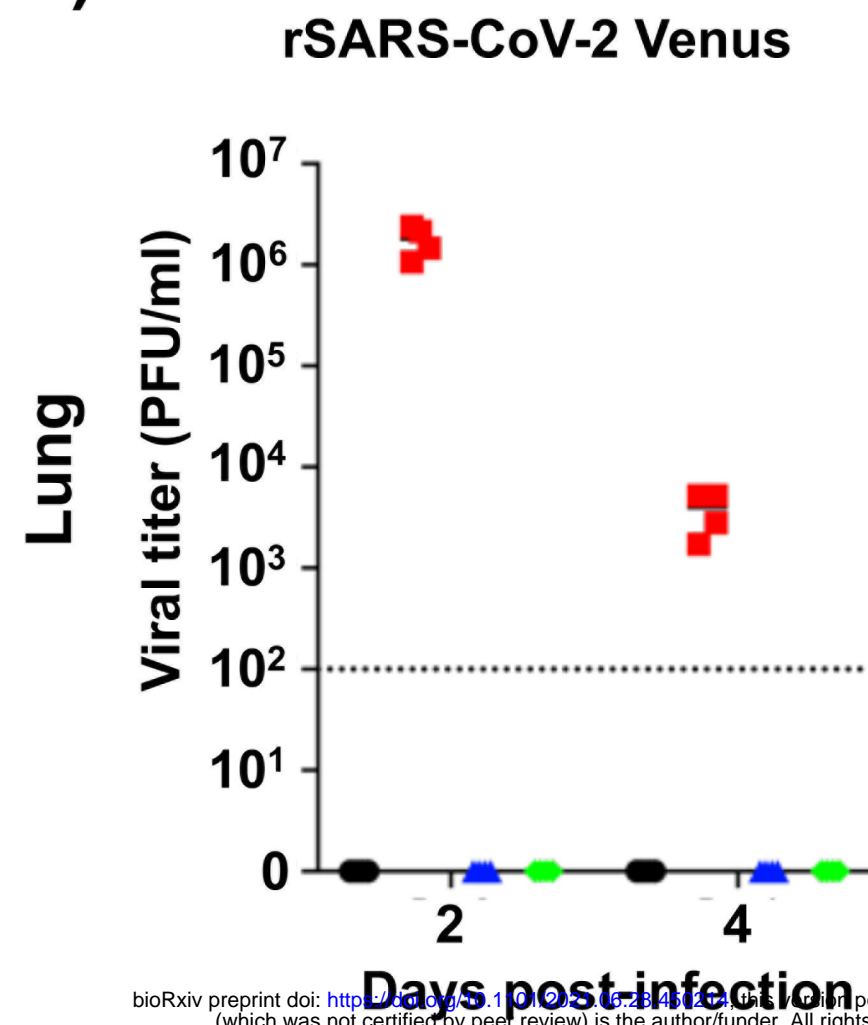**B)**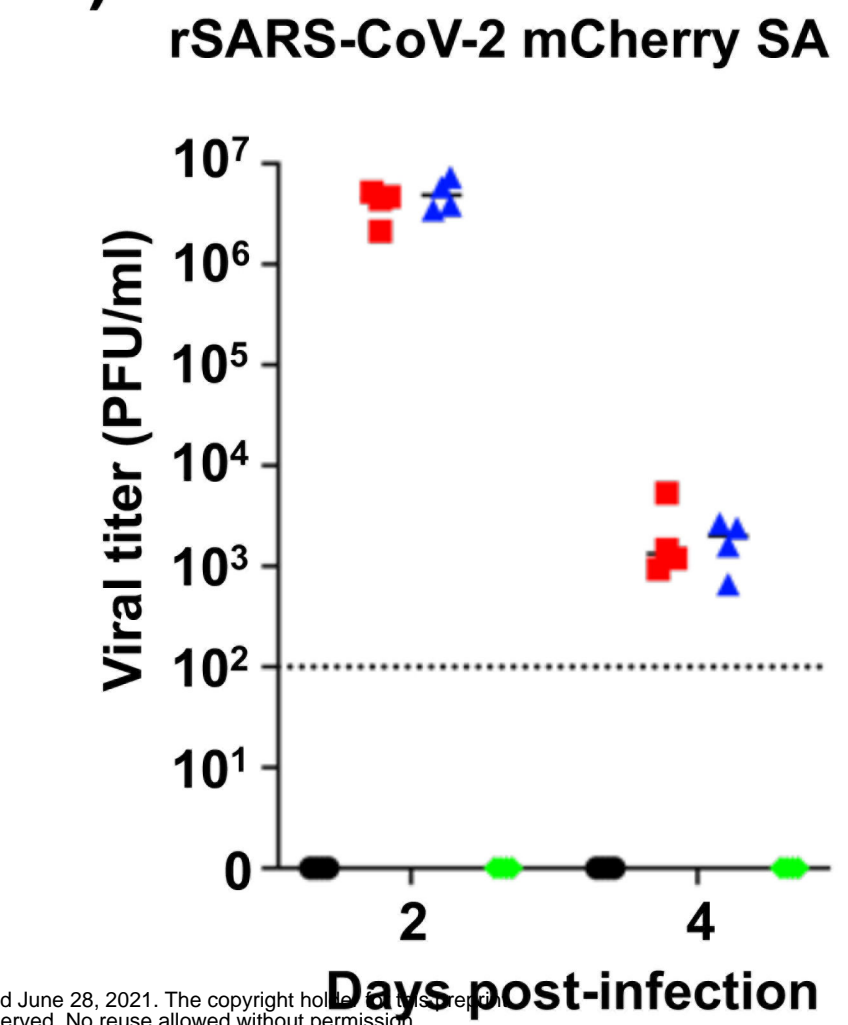**C)**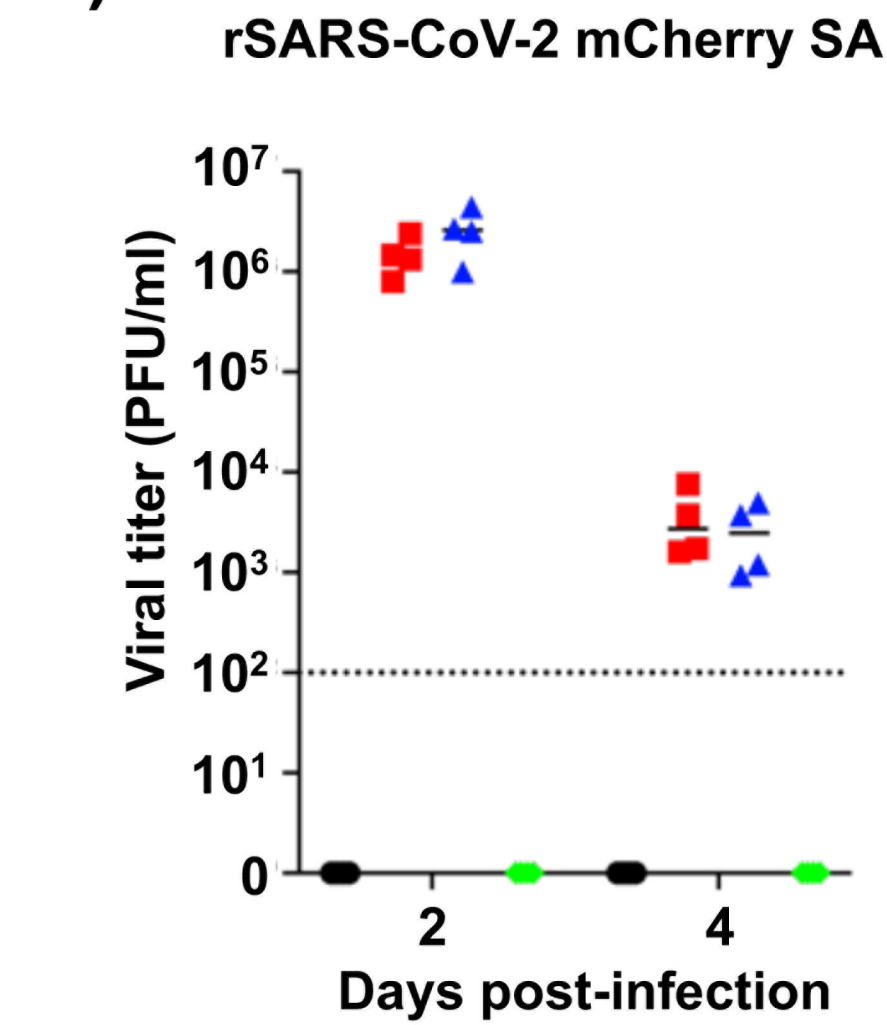**D)**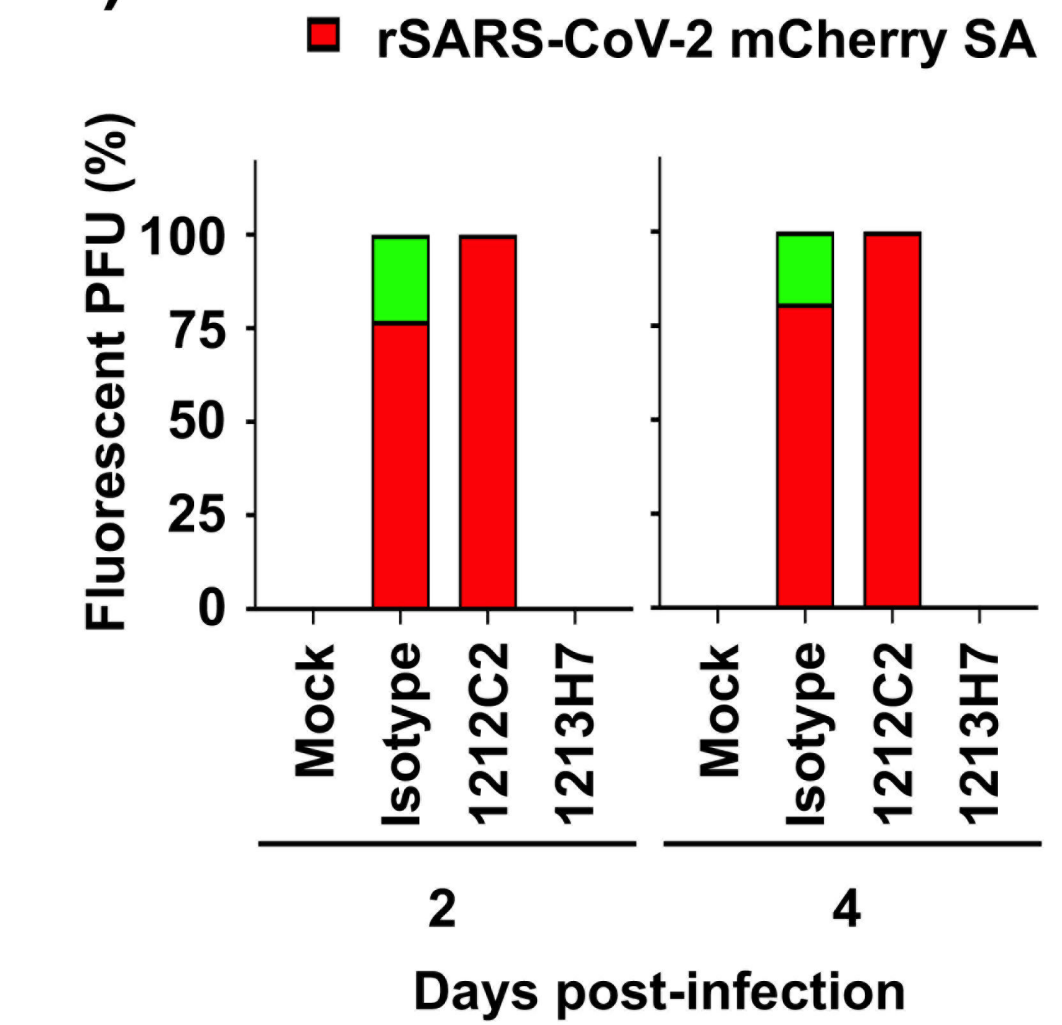

bioRxiv preprint doi: <https://doi.org/10.1101/2021.06.28.448120>; this version posted June 28, 2021. The copyright holder for this preprint (which was not certified by peer review) is the author/funder. All rights reserved. No reuse allowed without permission.

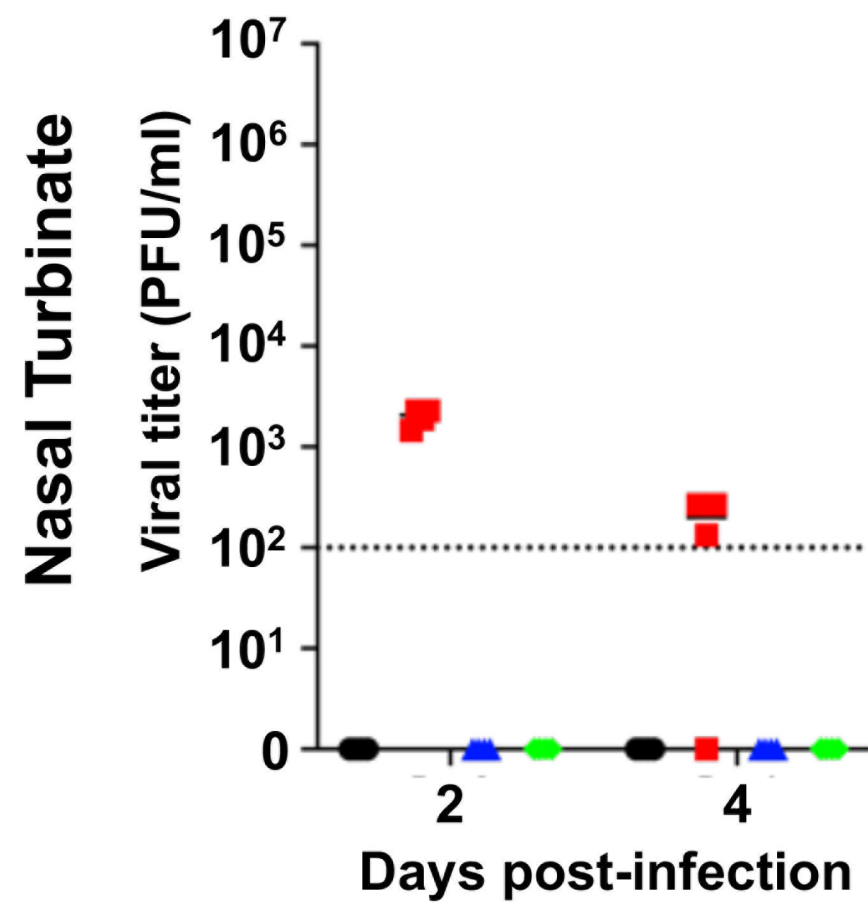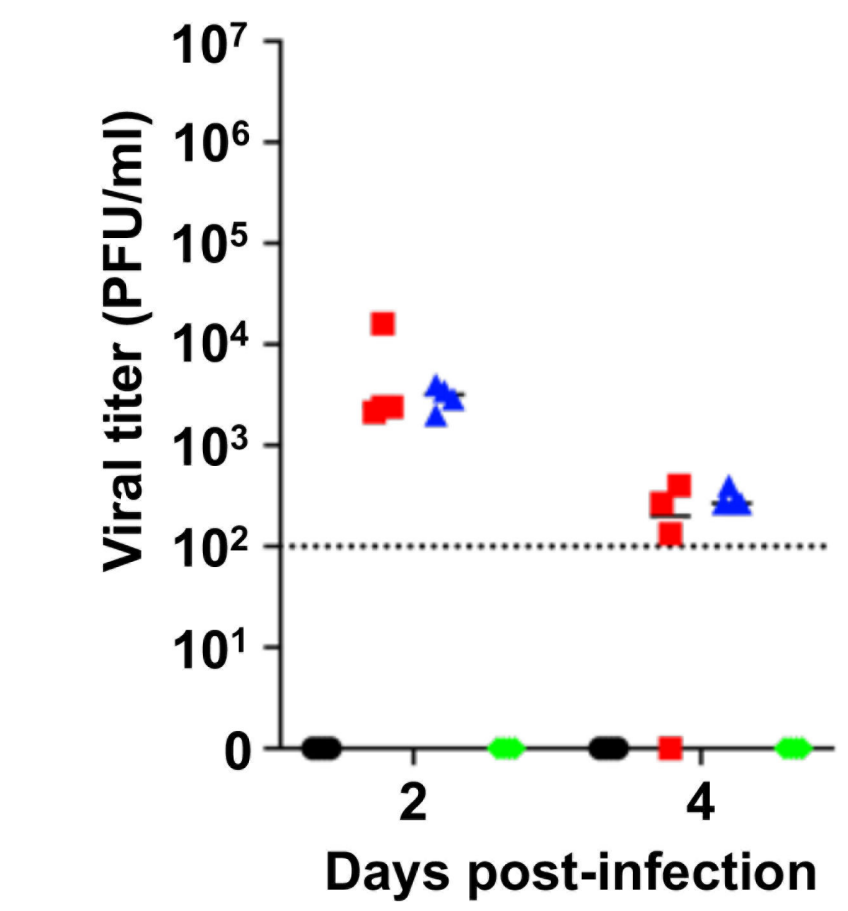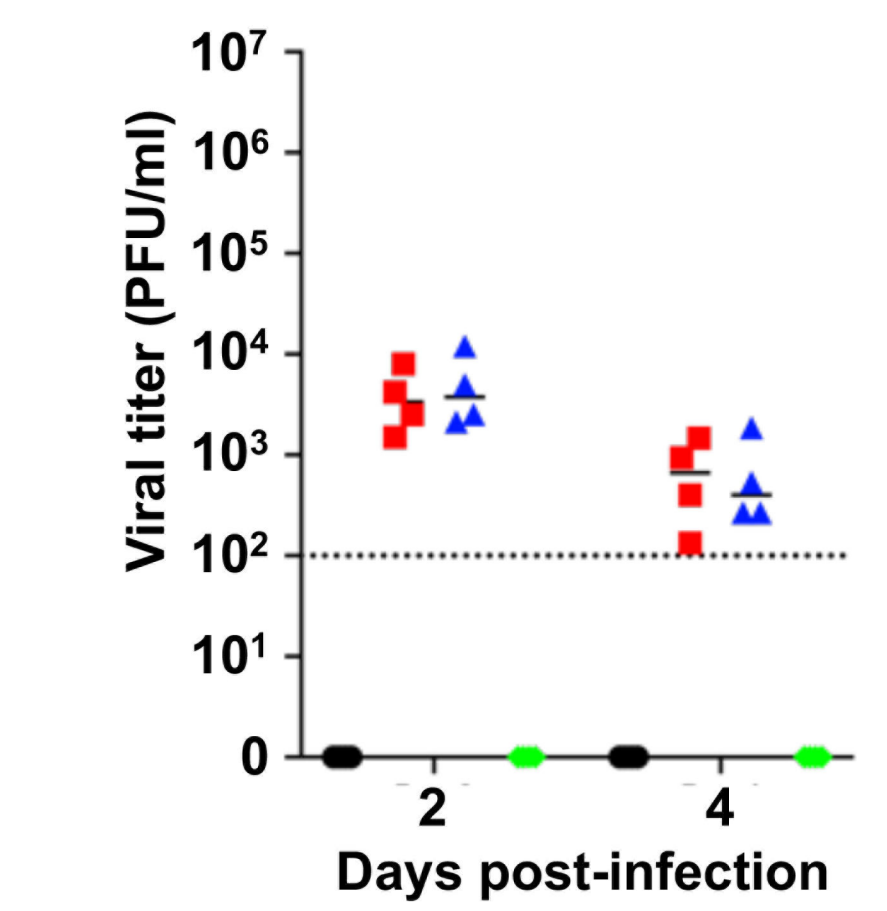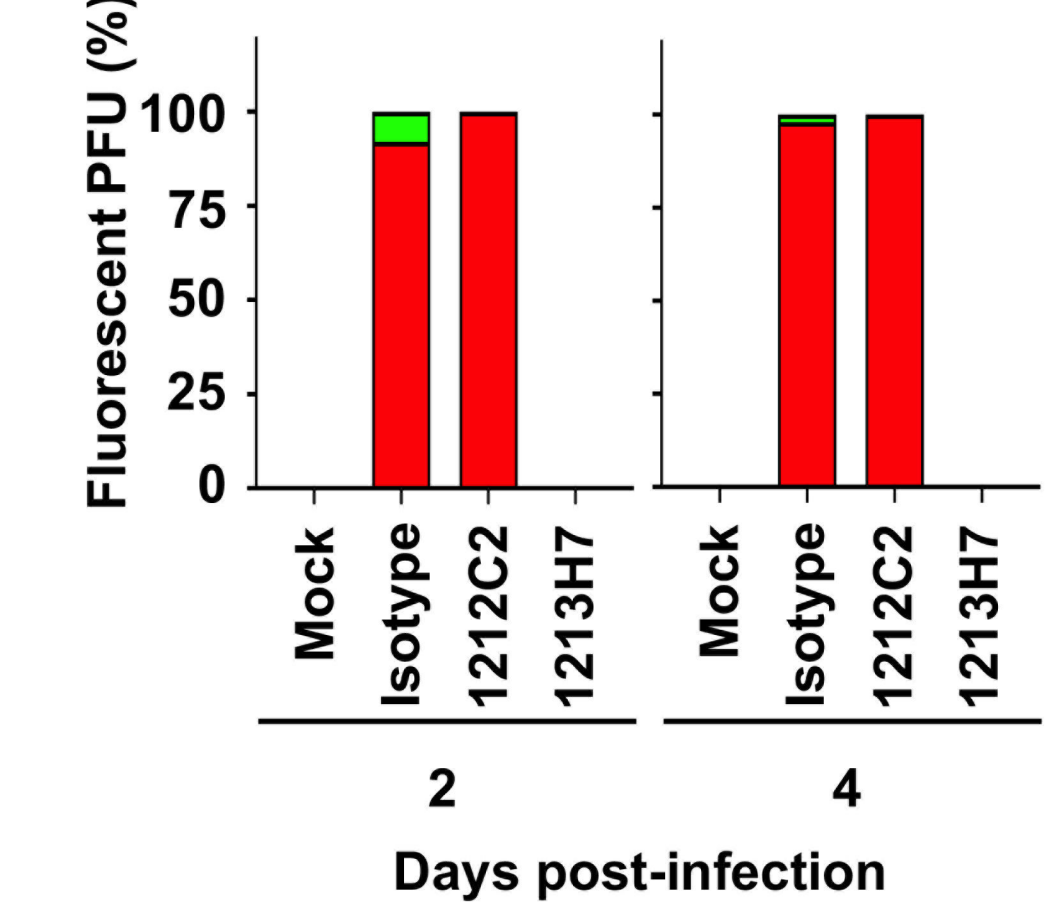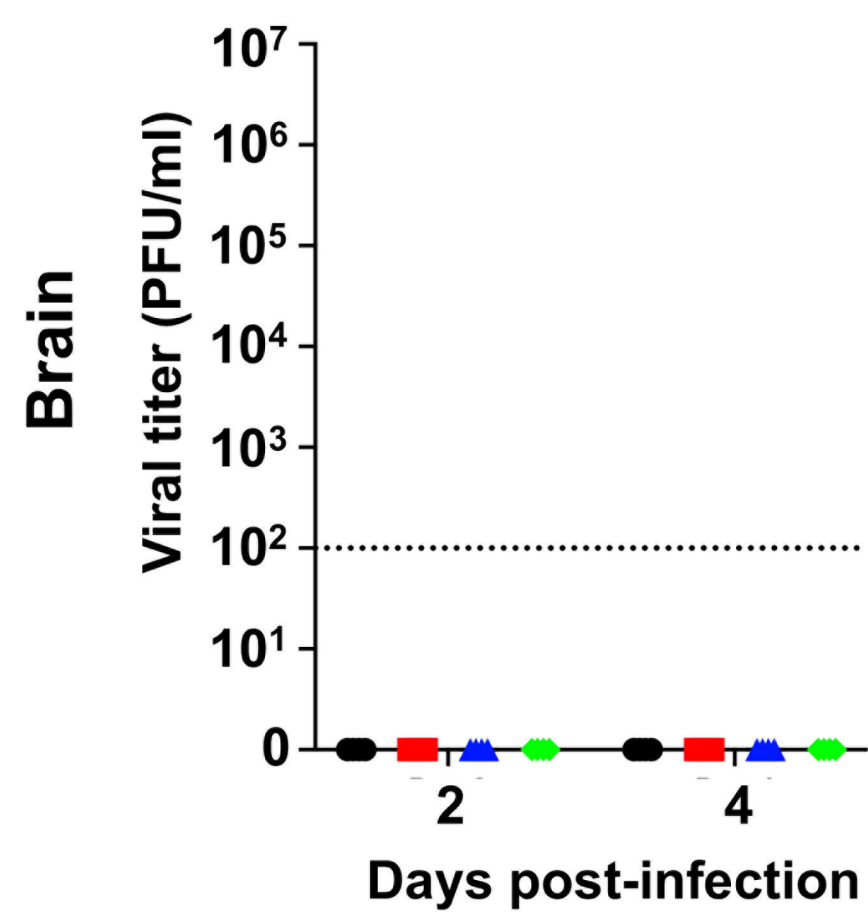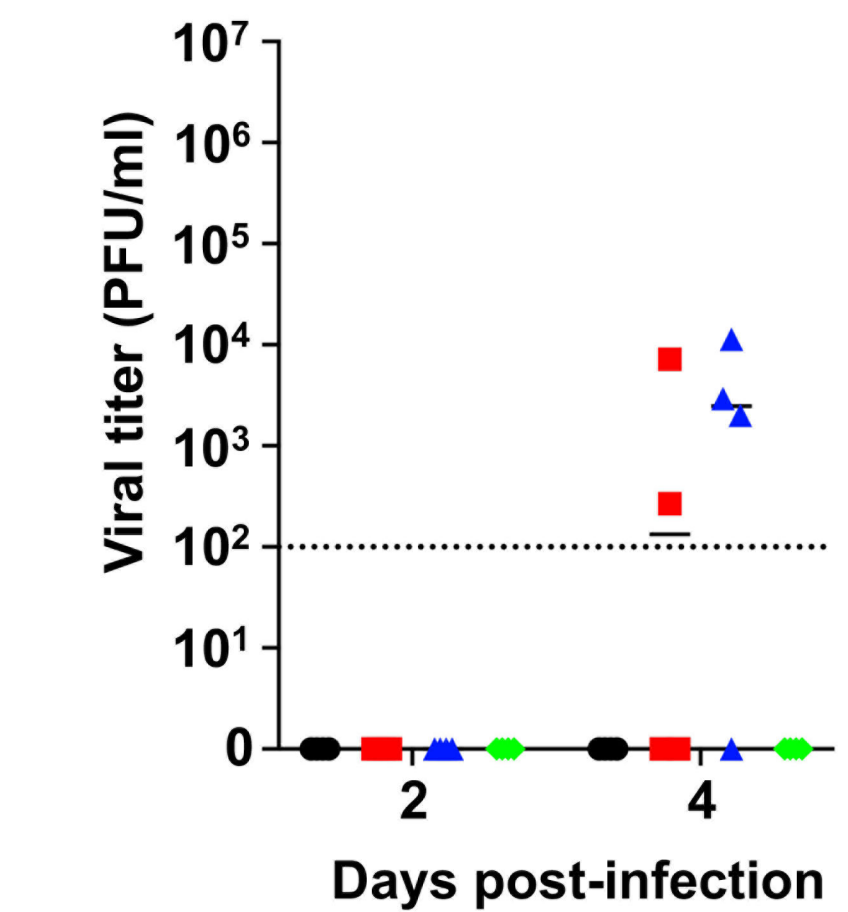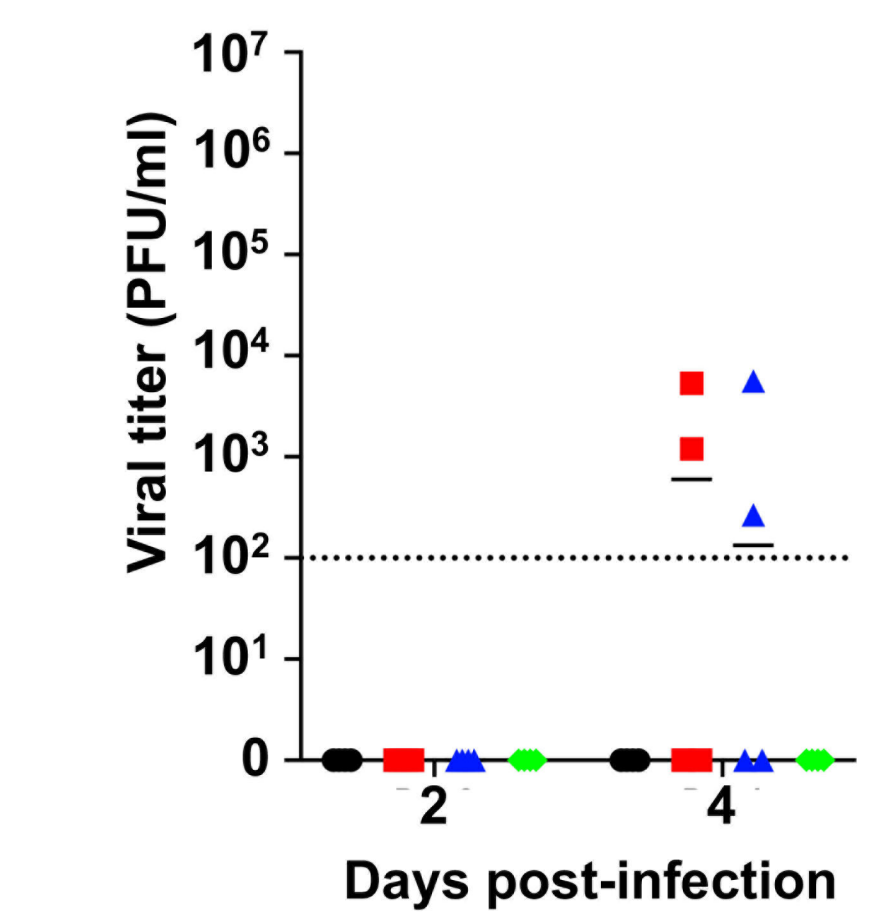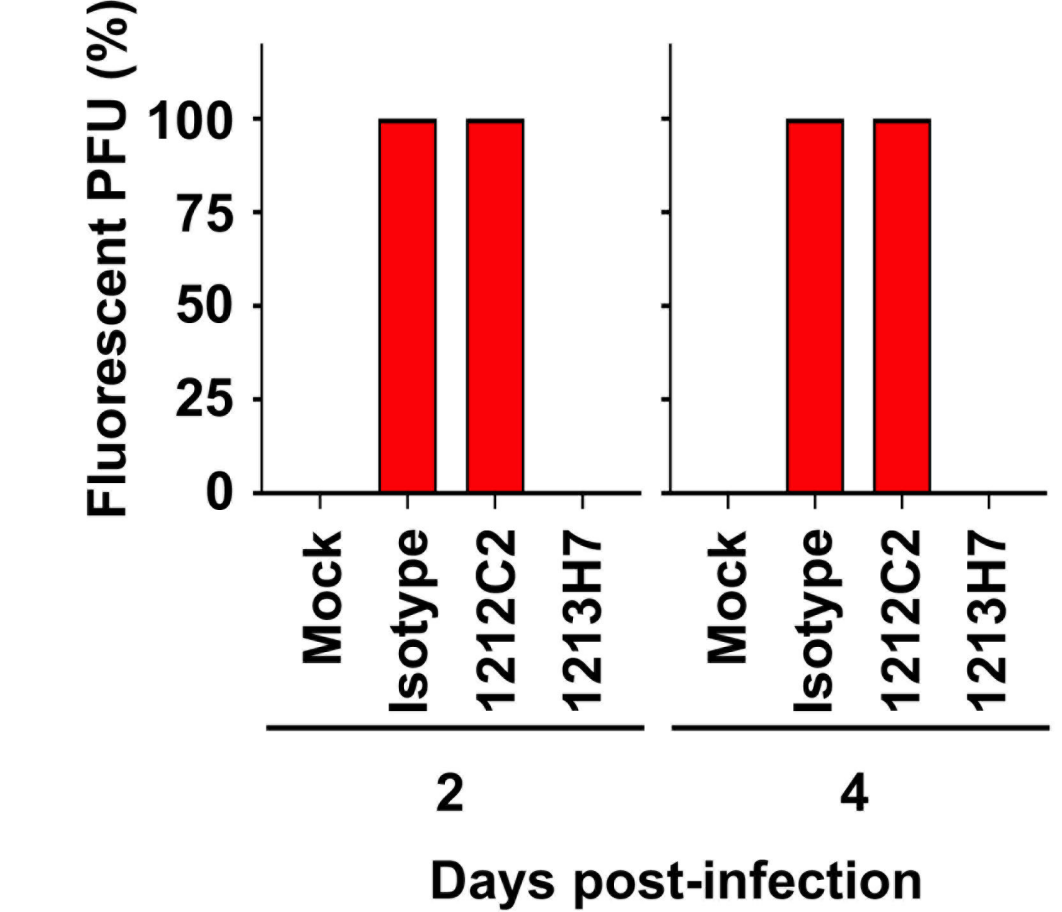

● Mock    ■ Isotype    ▲ 1212C2    ◆ 1213H7
